# Supplementary material for: Multi-method genome- and epigenome-wide studies of inflammatory protein levels in healthy older adults
Source: PubMed Central journal article supplement (PMC7346642; doi:10.1186/s13073-020-00754-1), 2020-07-08

Pre-adjusted ADA Distribution

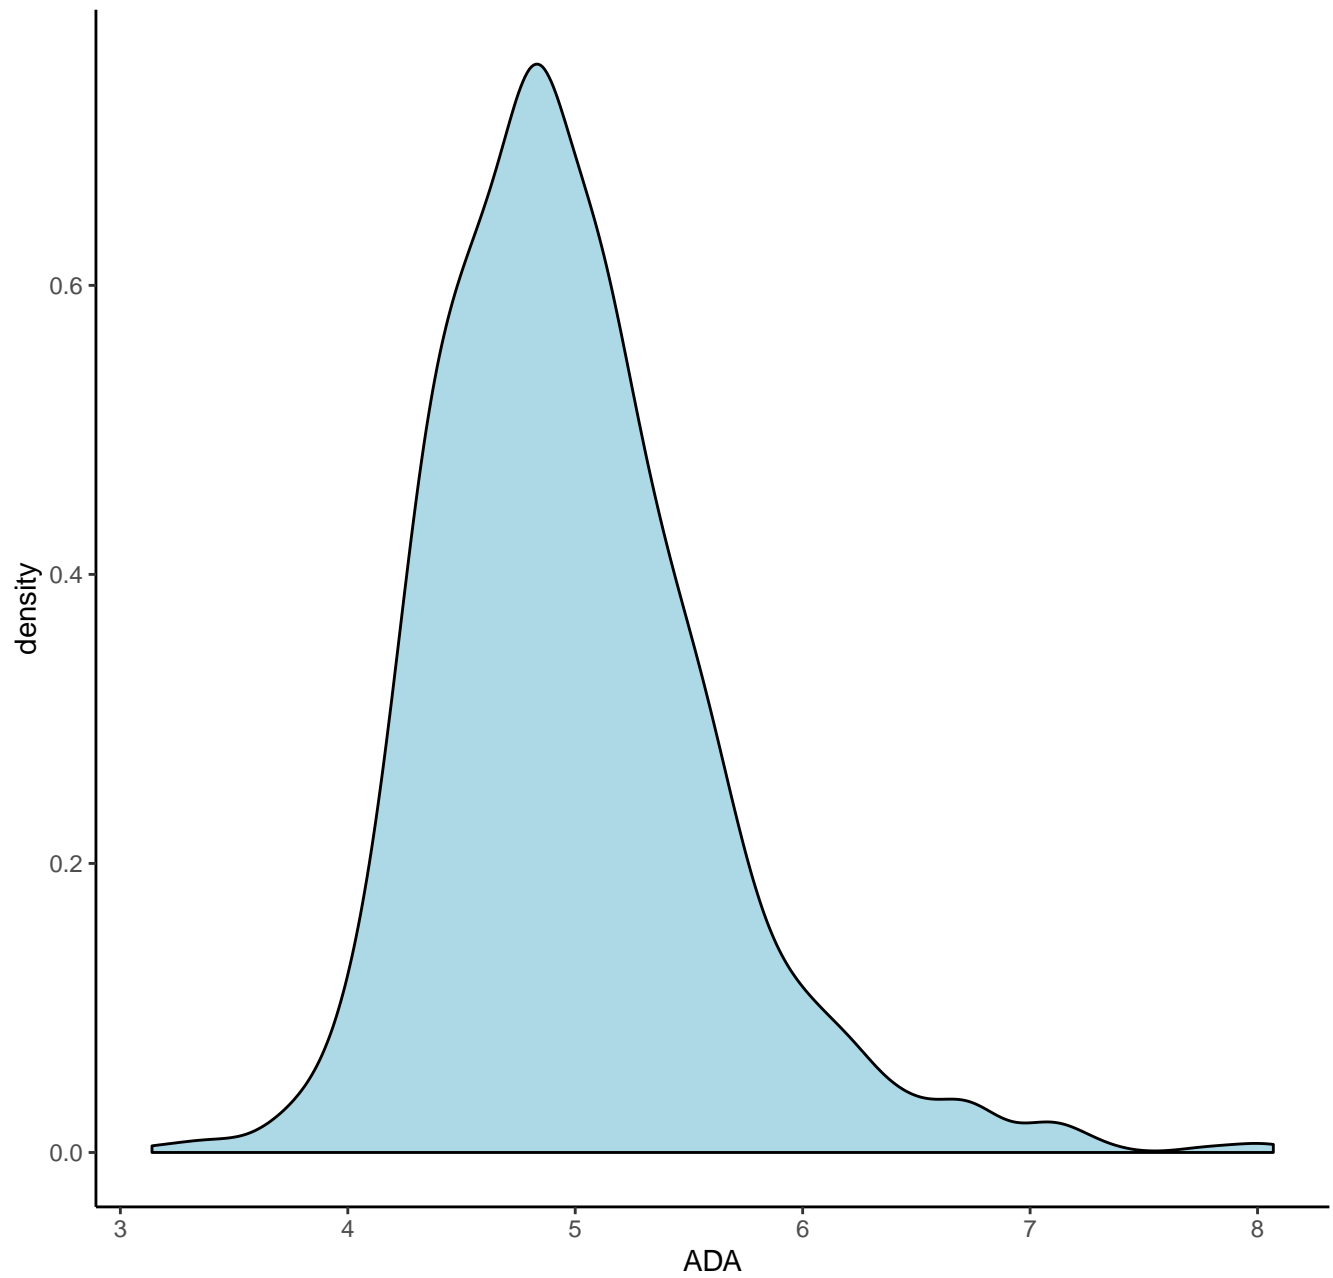

Pre-adjusted AXIN1 Distribution

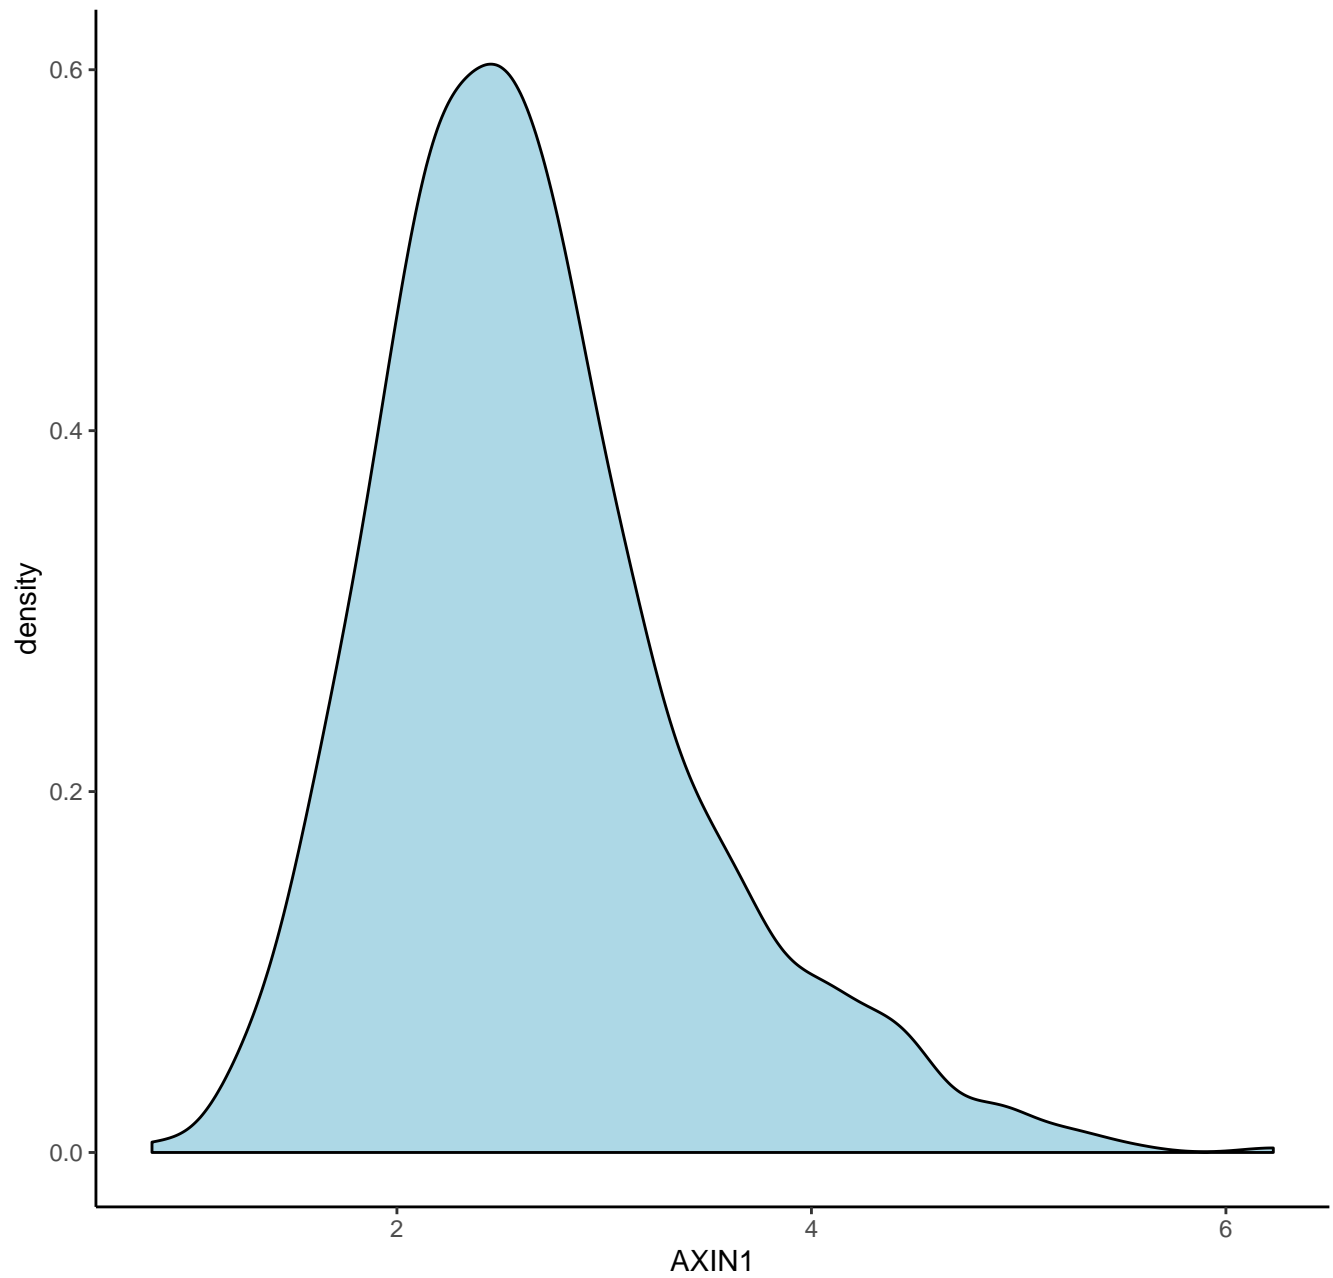

Pre-adjusted Beta.NGF Distribution

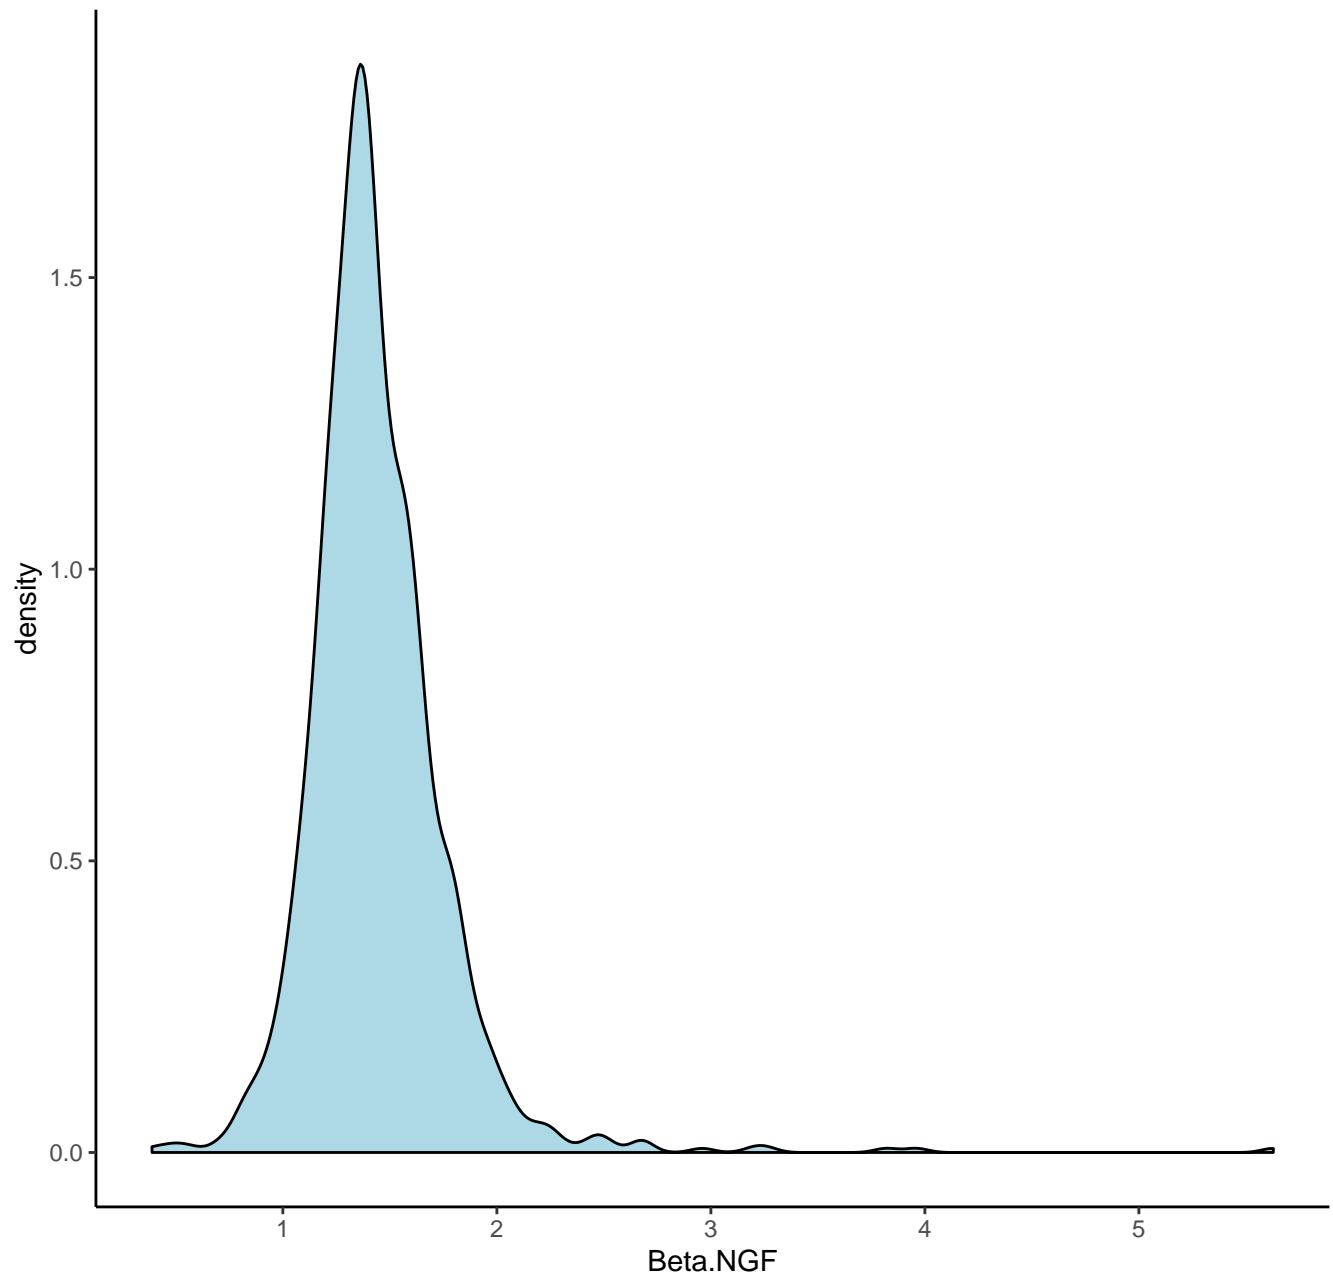

Pre-adjusted CASP.8 Distribution

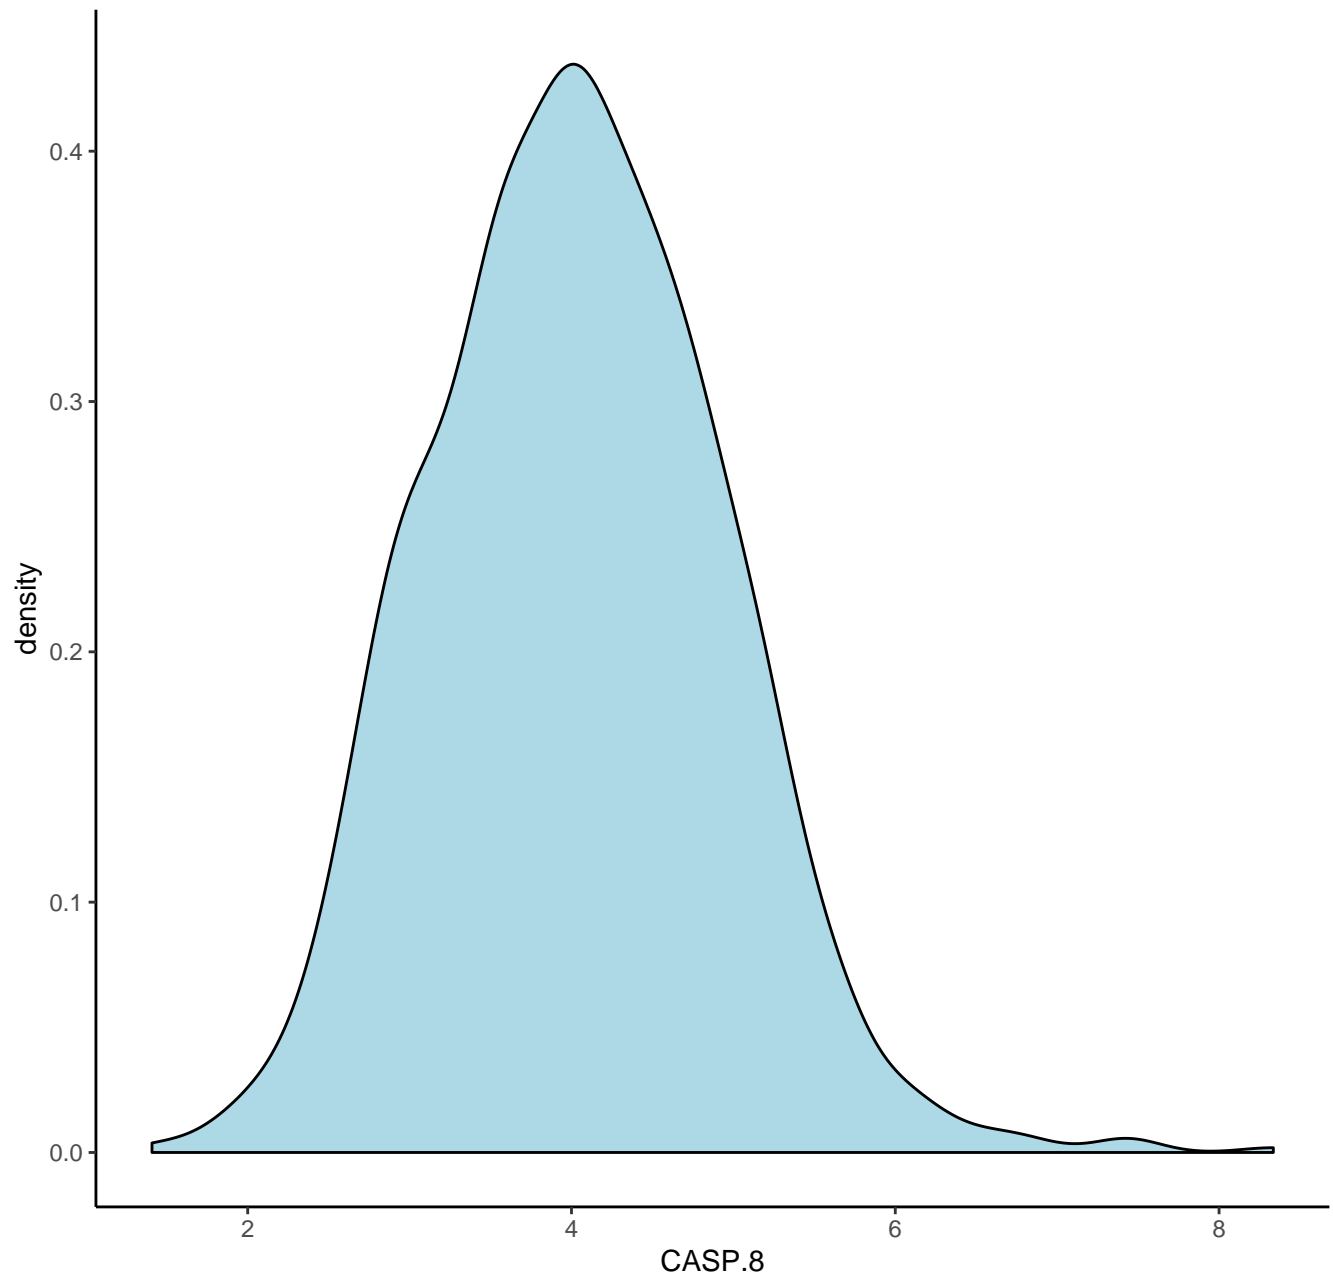

Pre-adjusted CCL11 Distribution

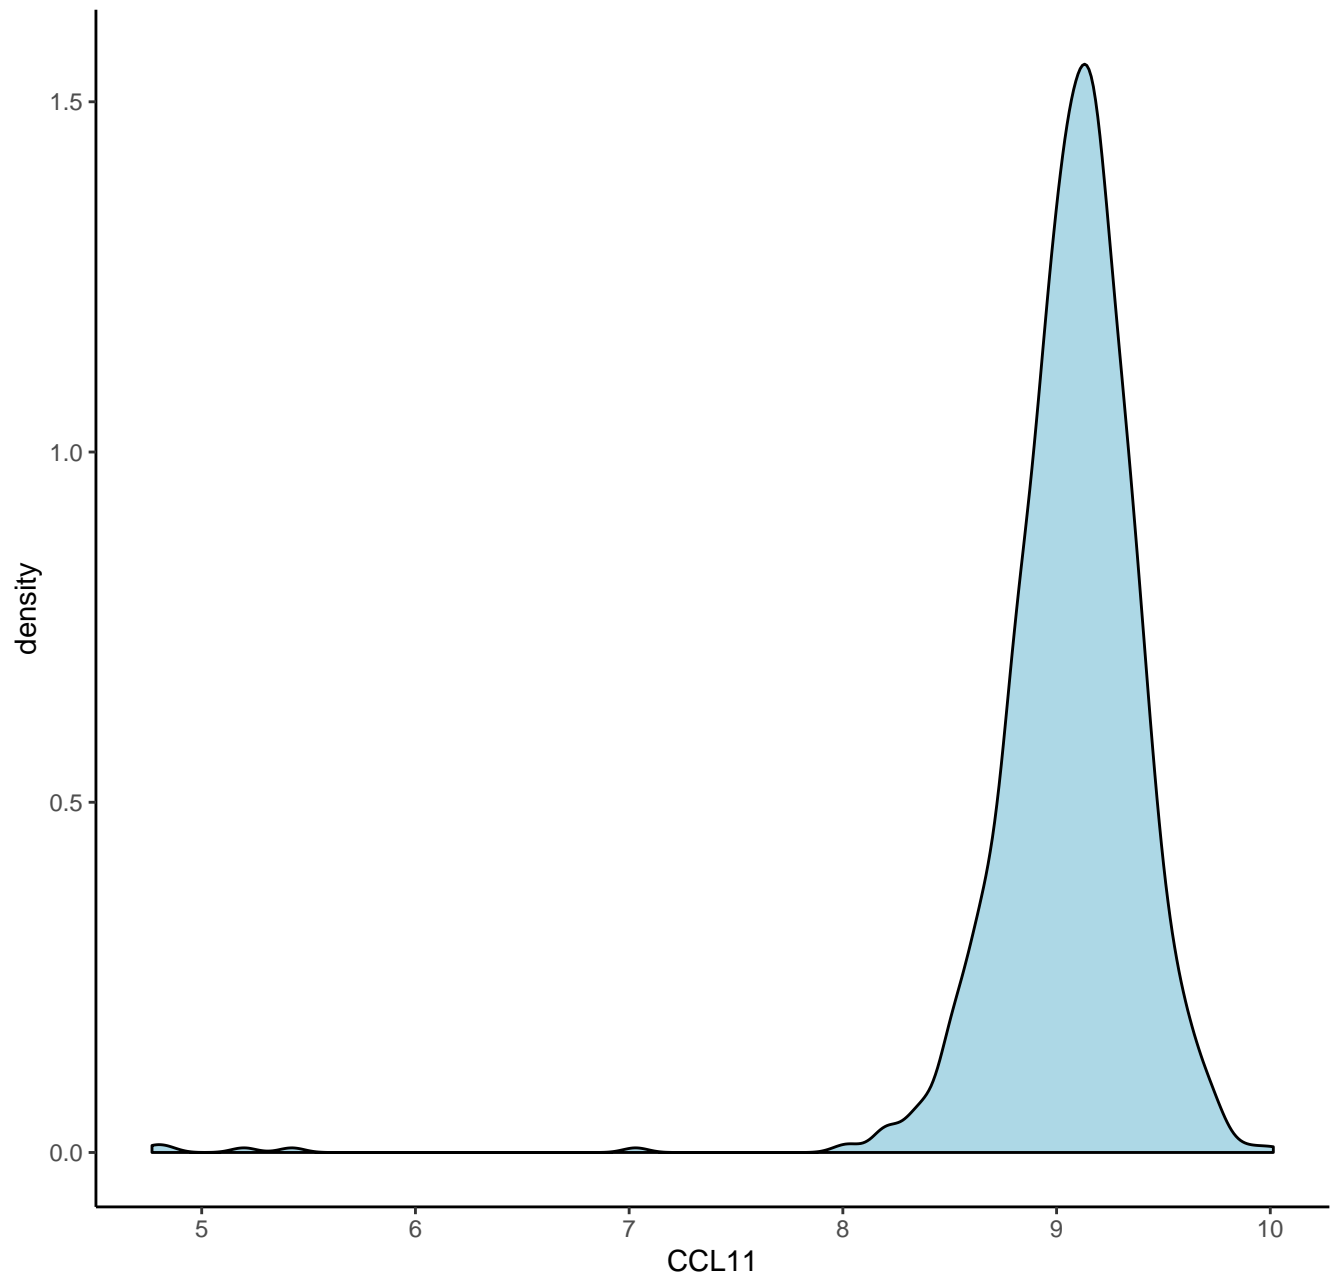

Pre-adjusted CCL19 Distribution

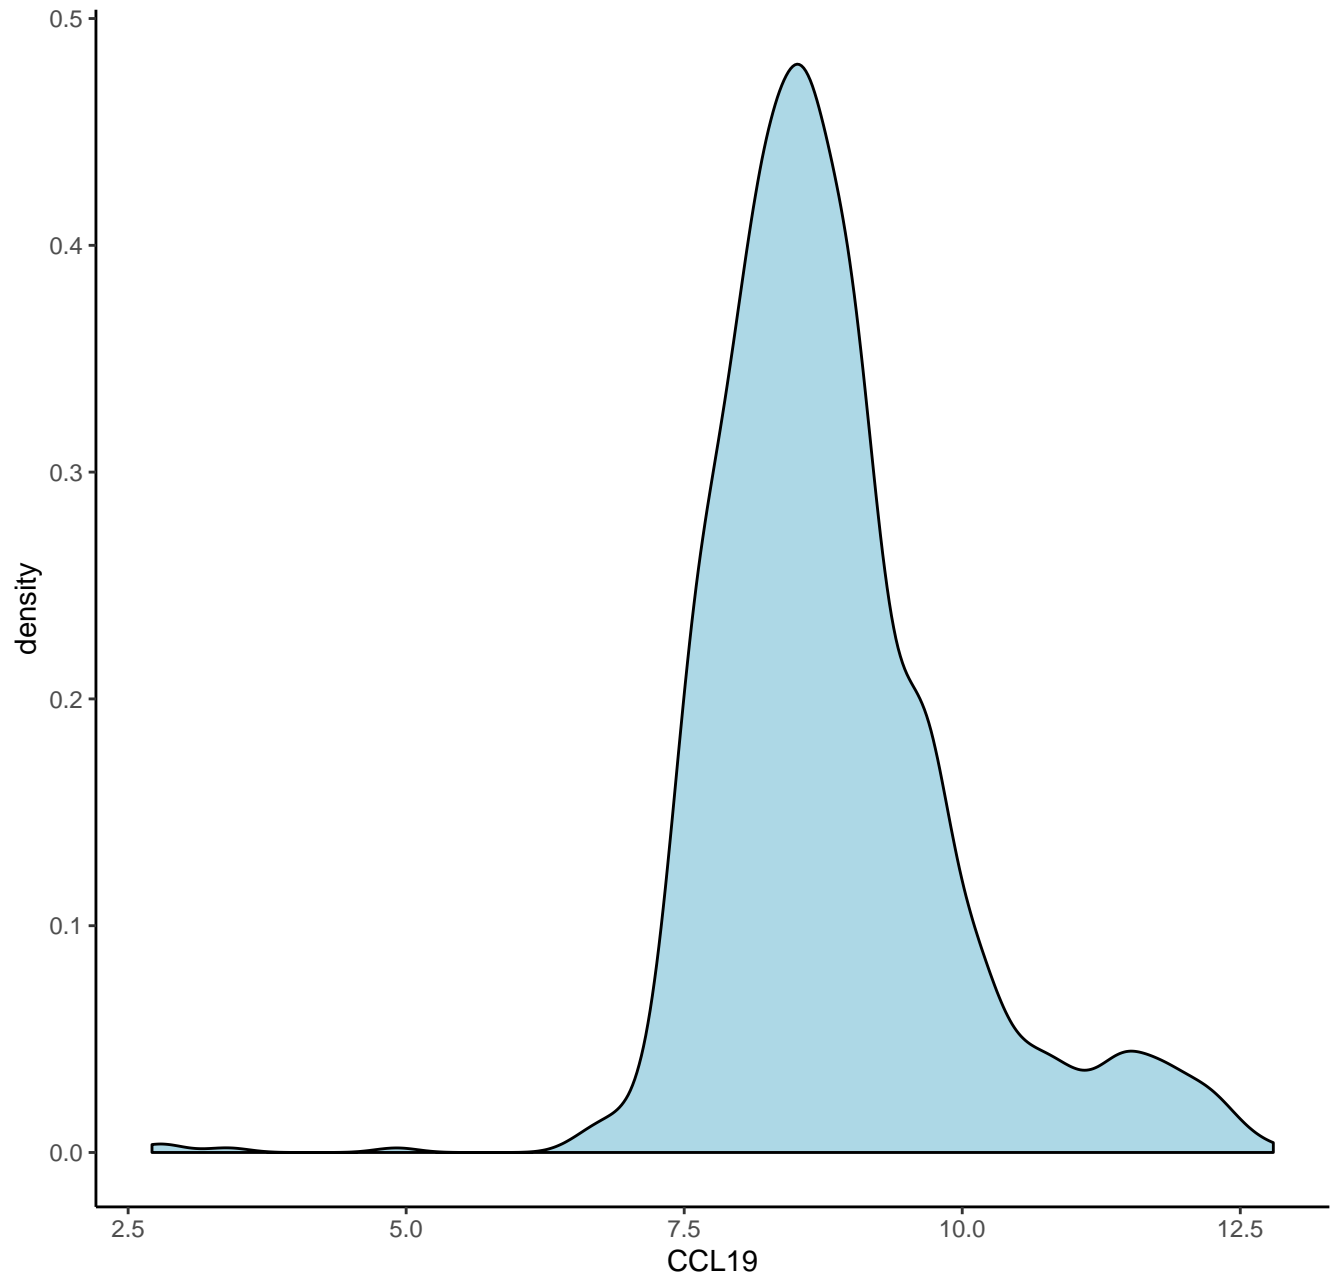

Pre-adjusted CCL20 Distribution

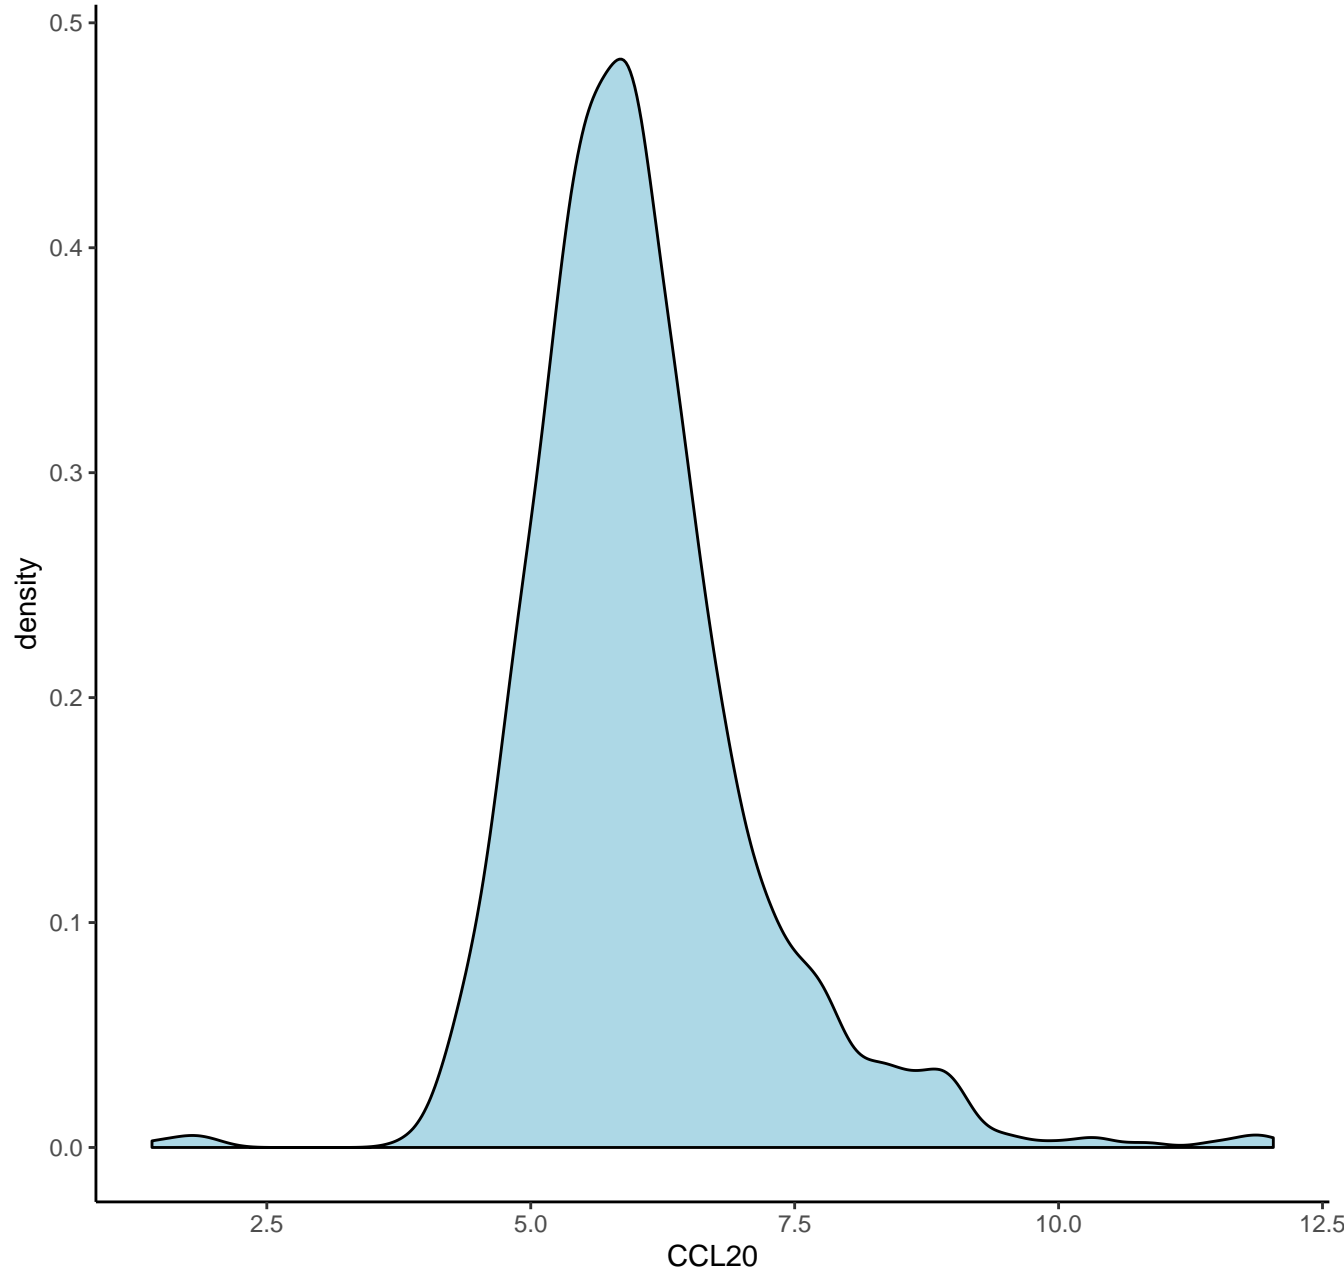

Pre-adjusted CCL23 Distribution

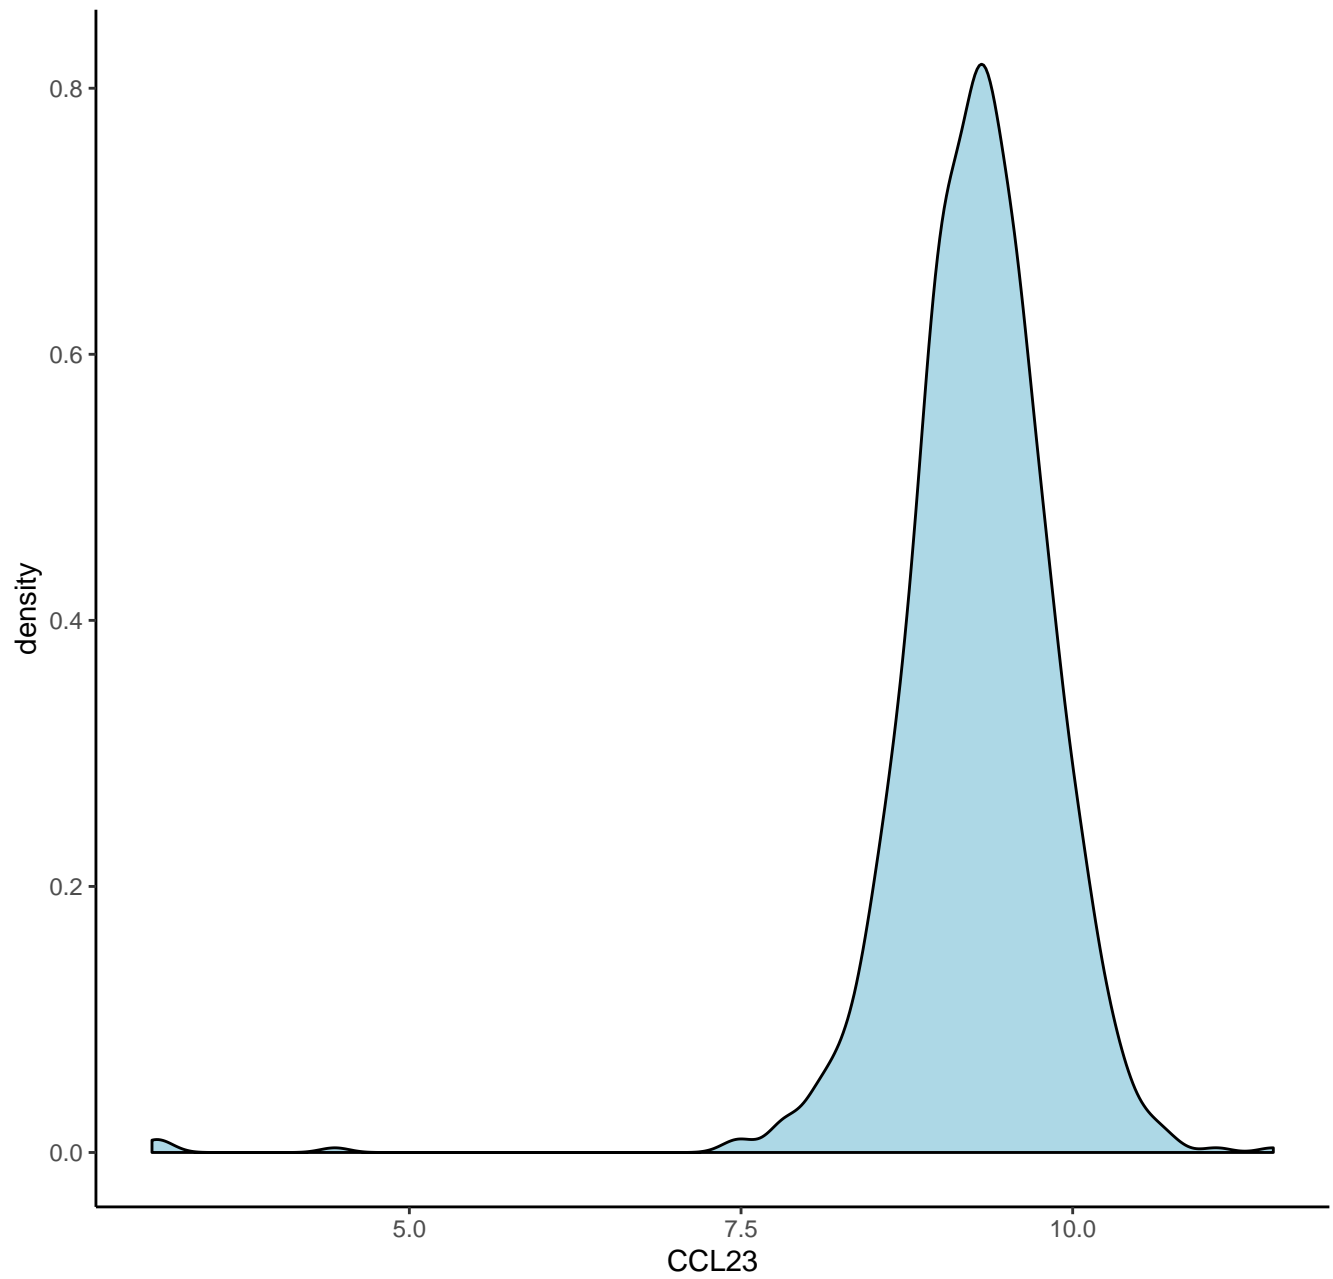



Pre-adjusted CCL25 Distribution

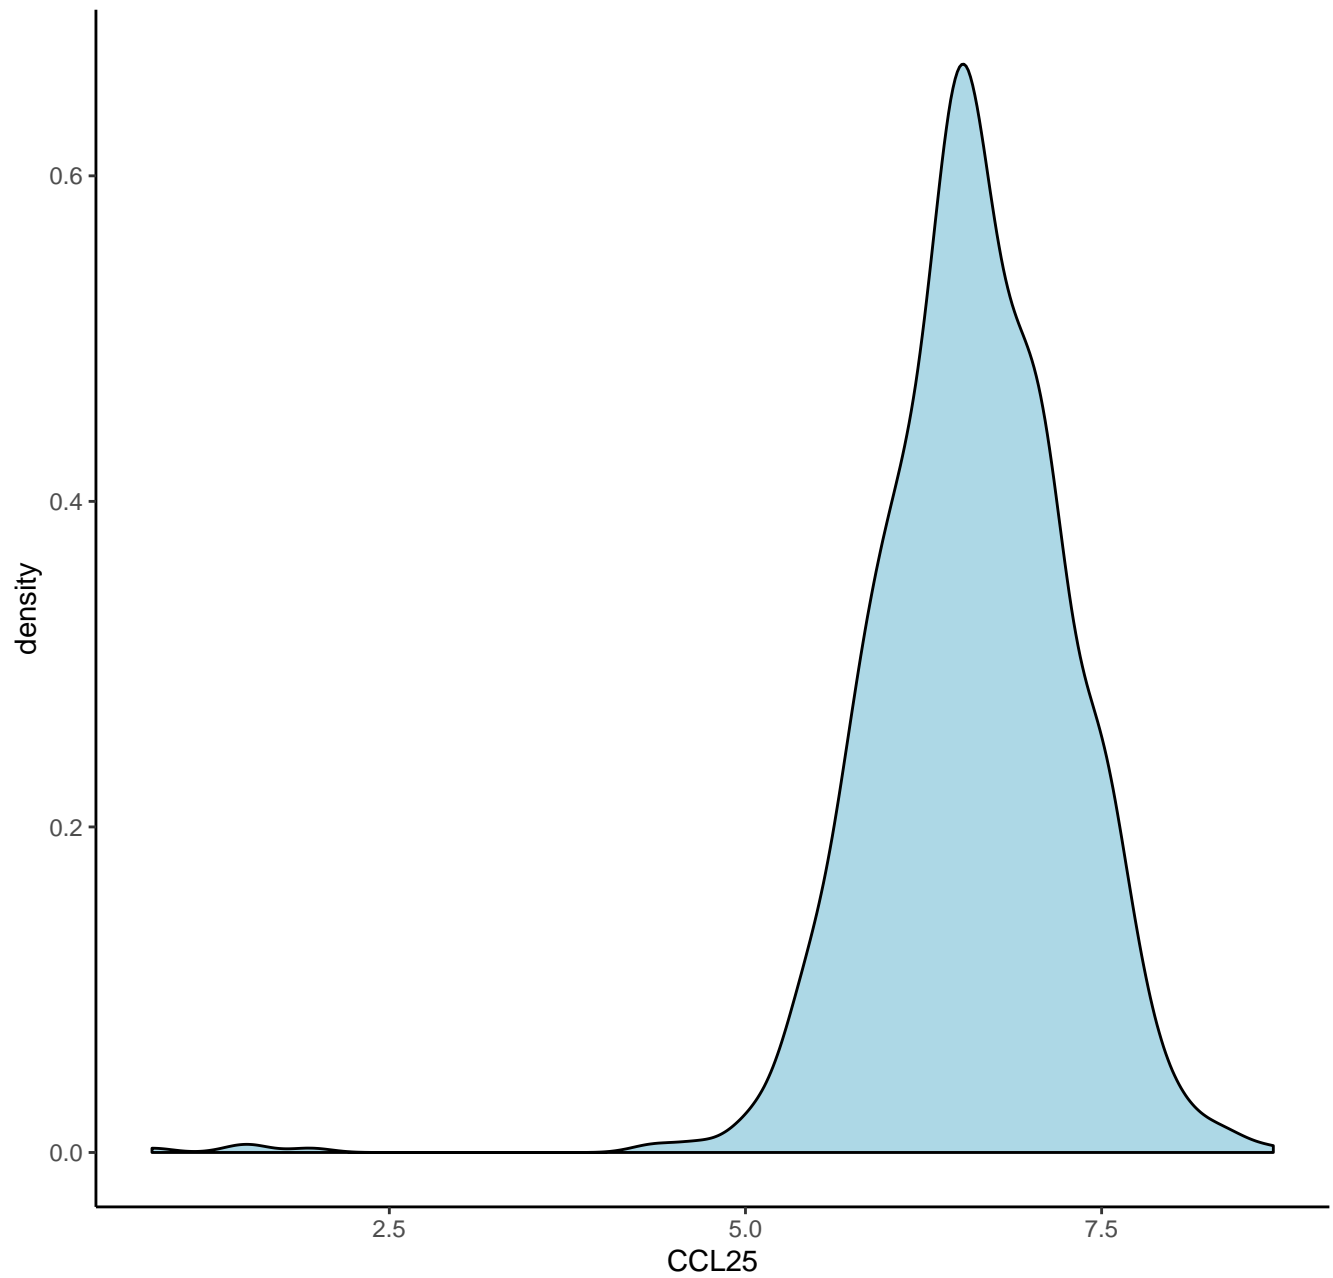

Pre-adjusted CCL28 Distribution

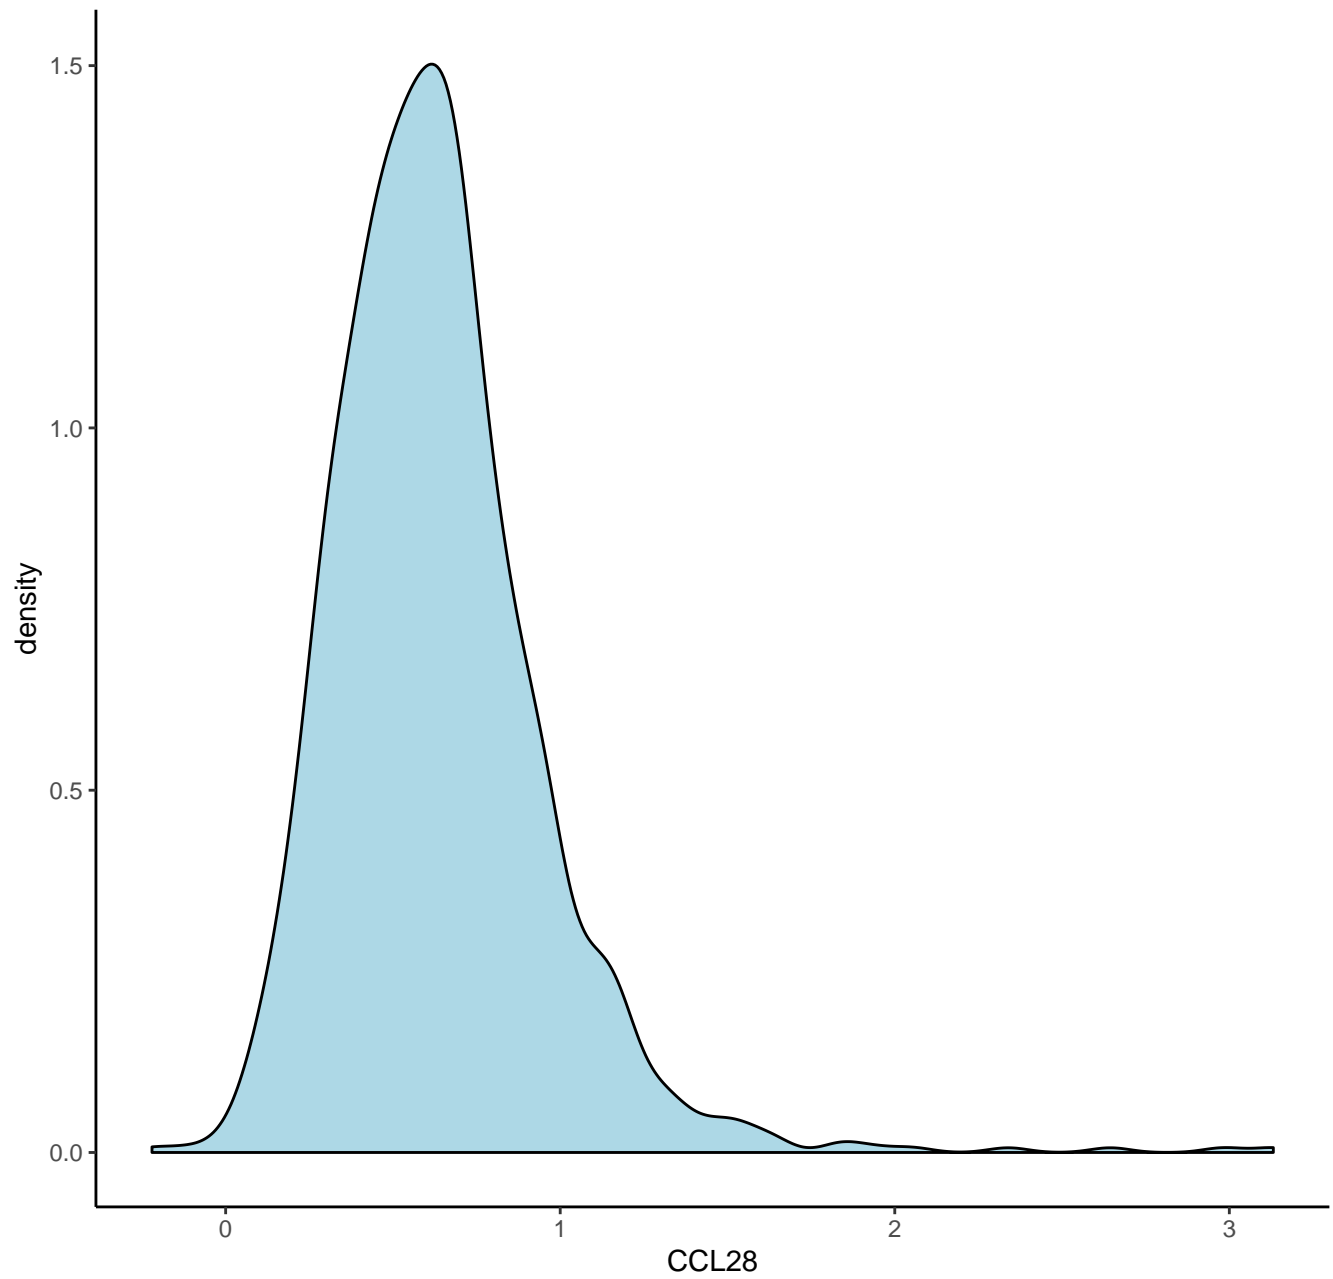

Pre-adjusted CCL3 Distribution

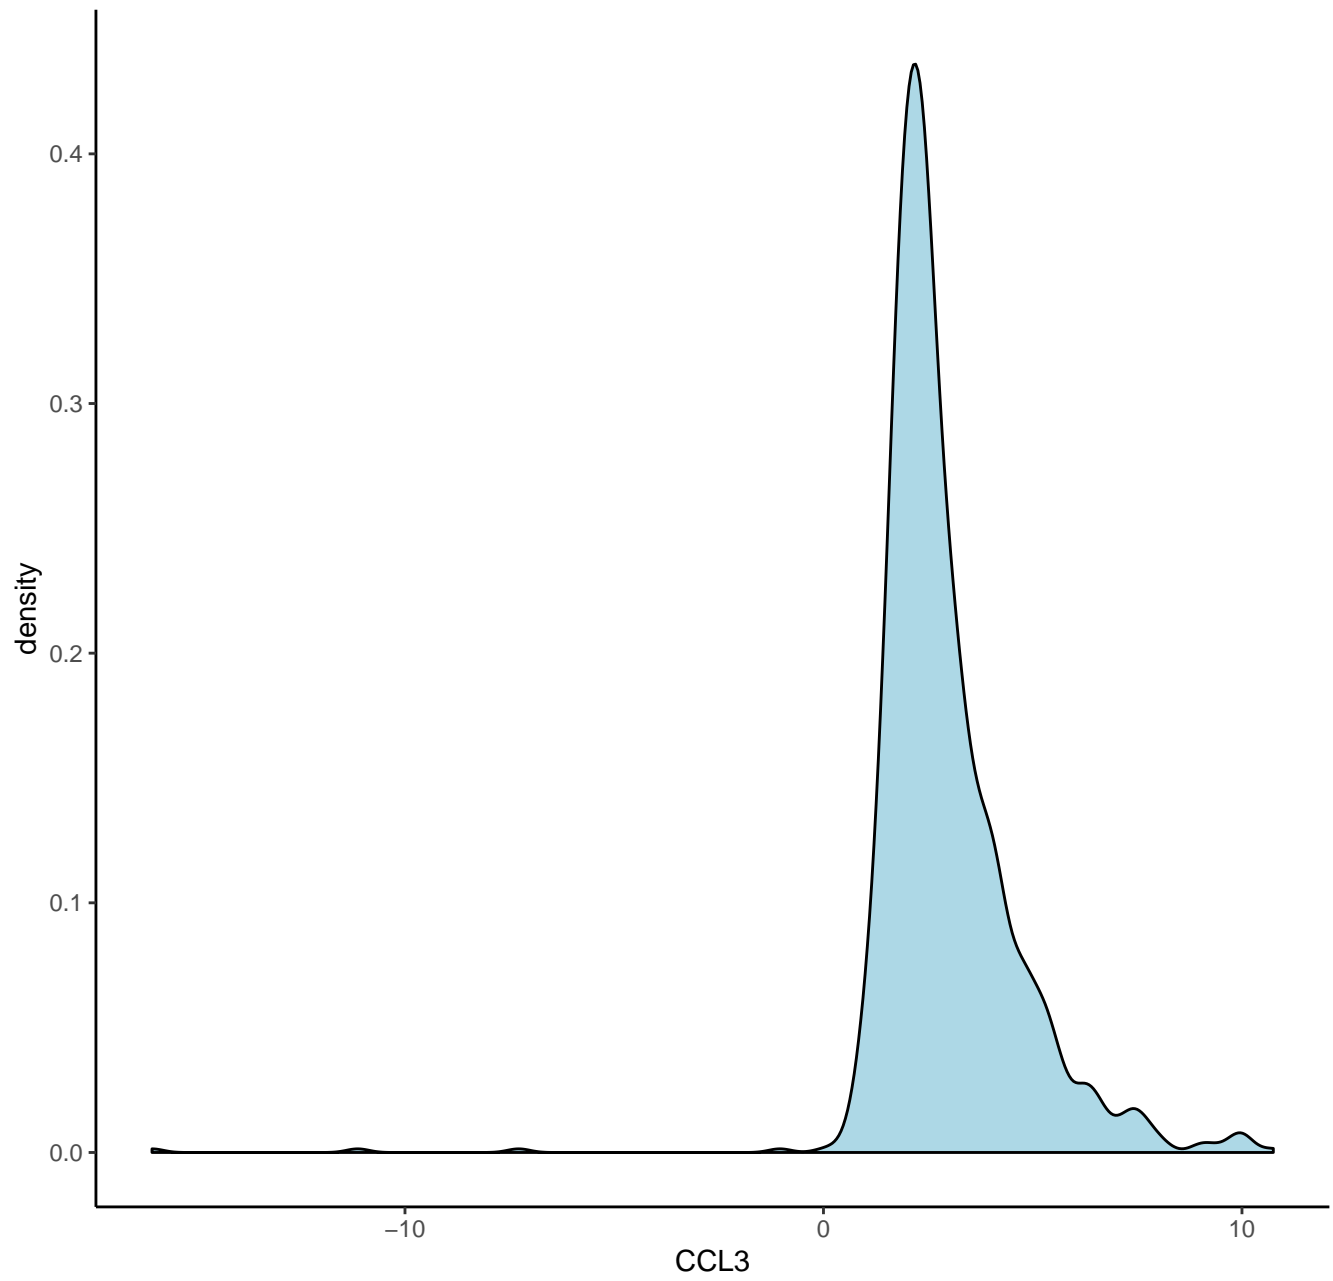

Pre-adjusted CCL4 Distribution

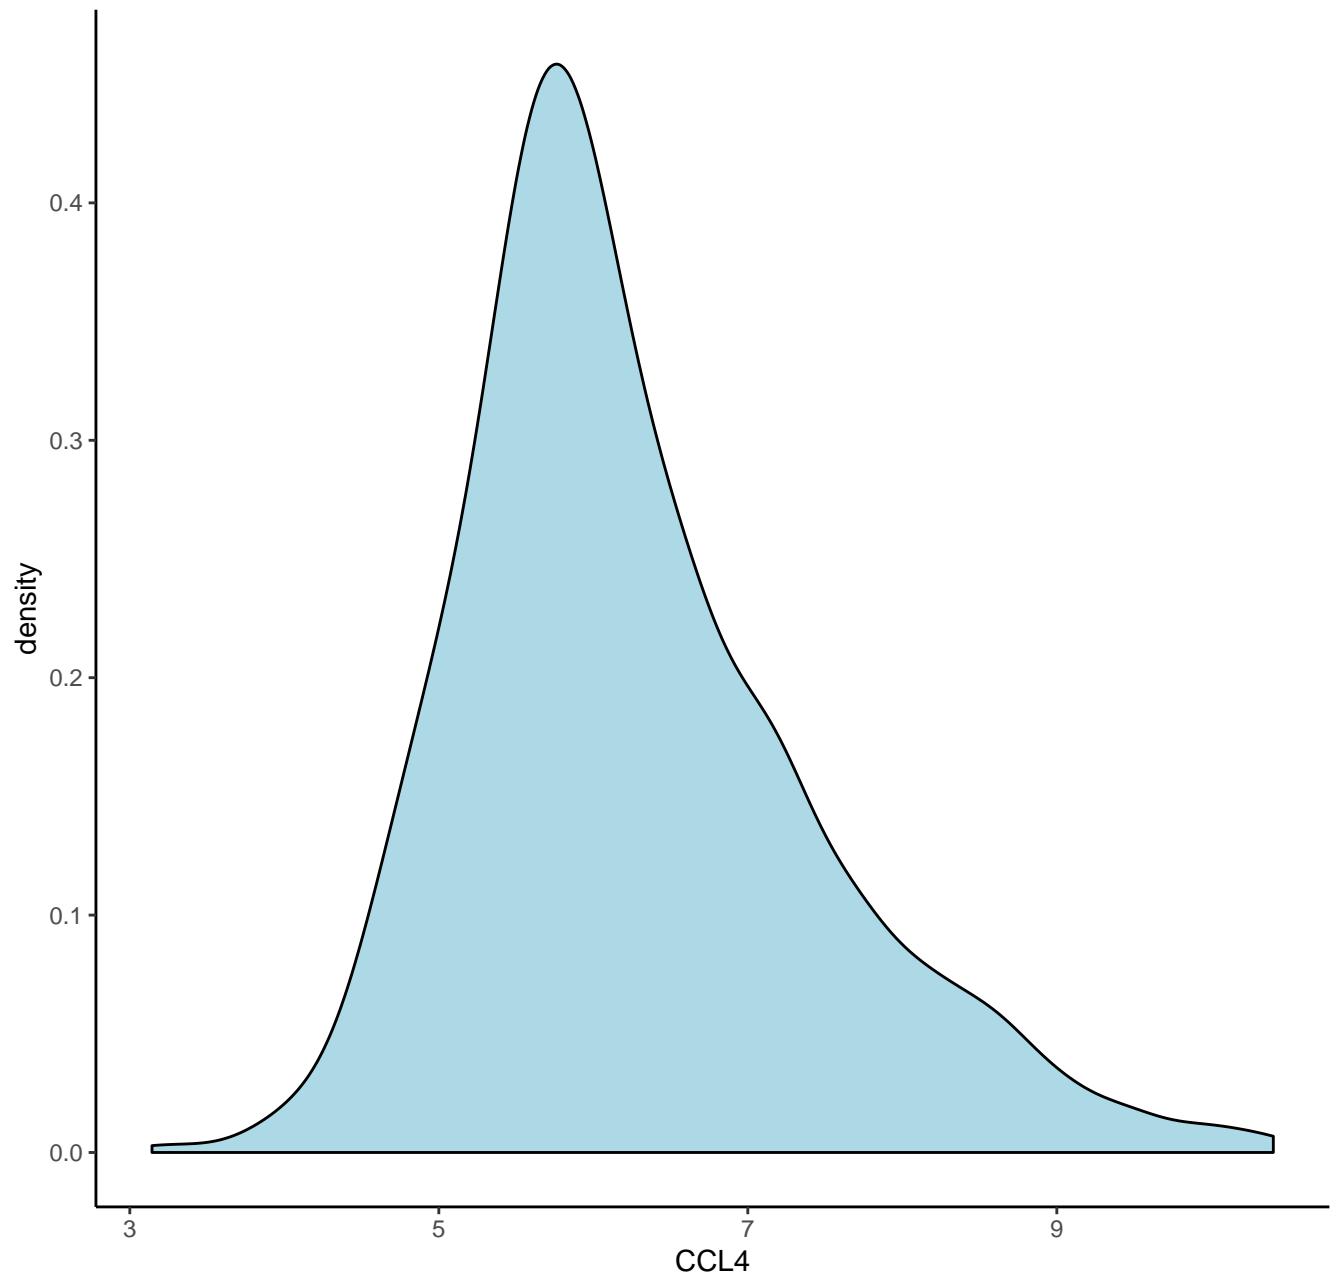

Pre-adjusted CD244 Distribution

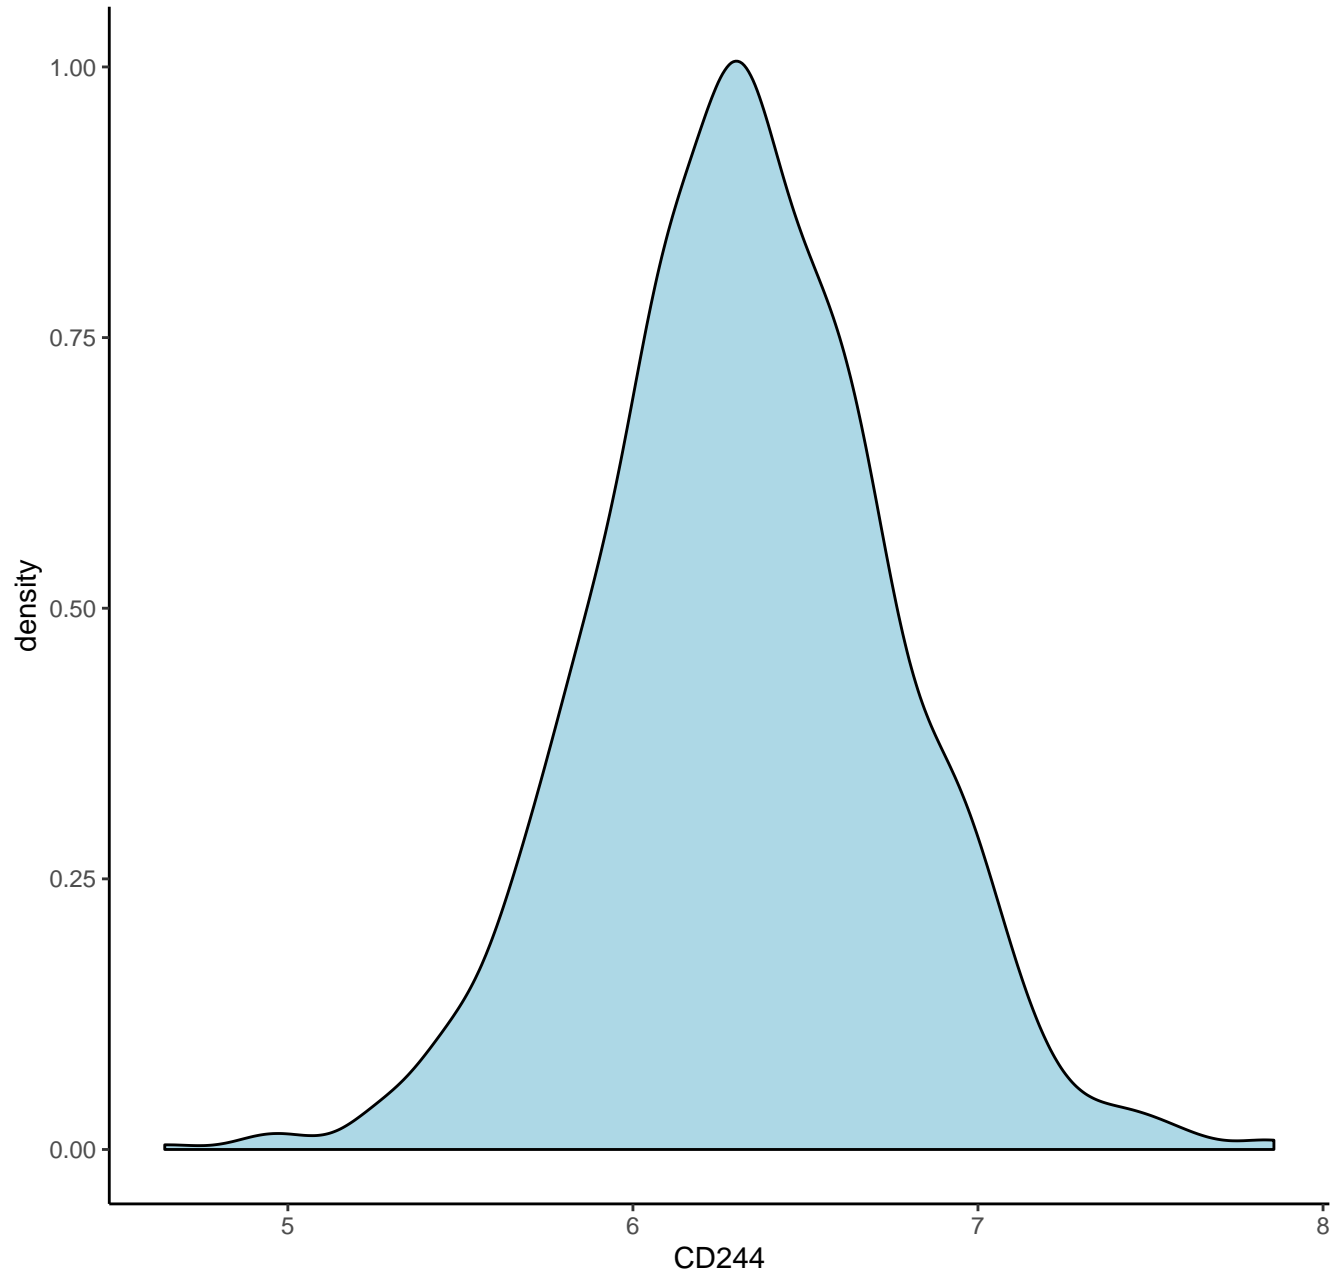

Pre-adjusted CD40 Distribution

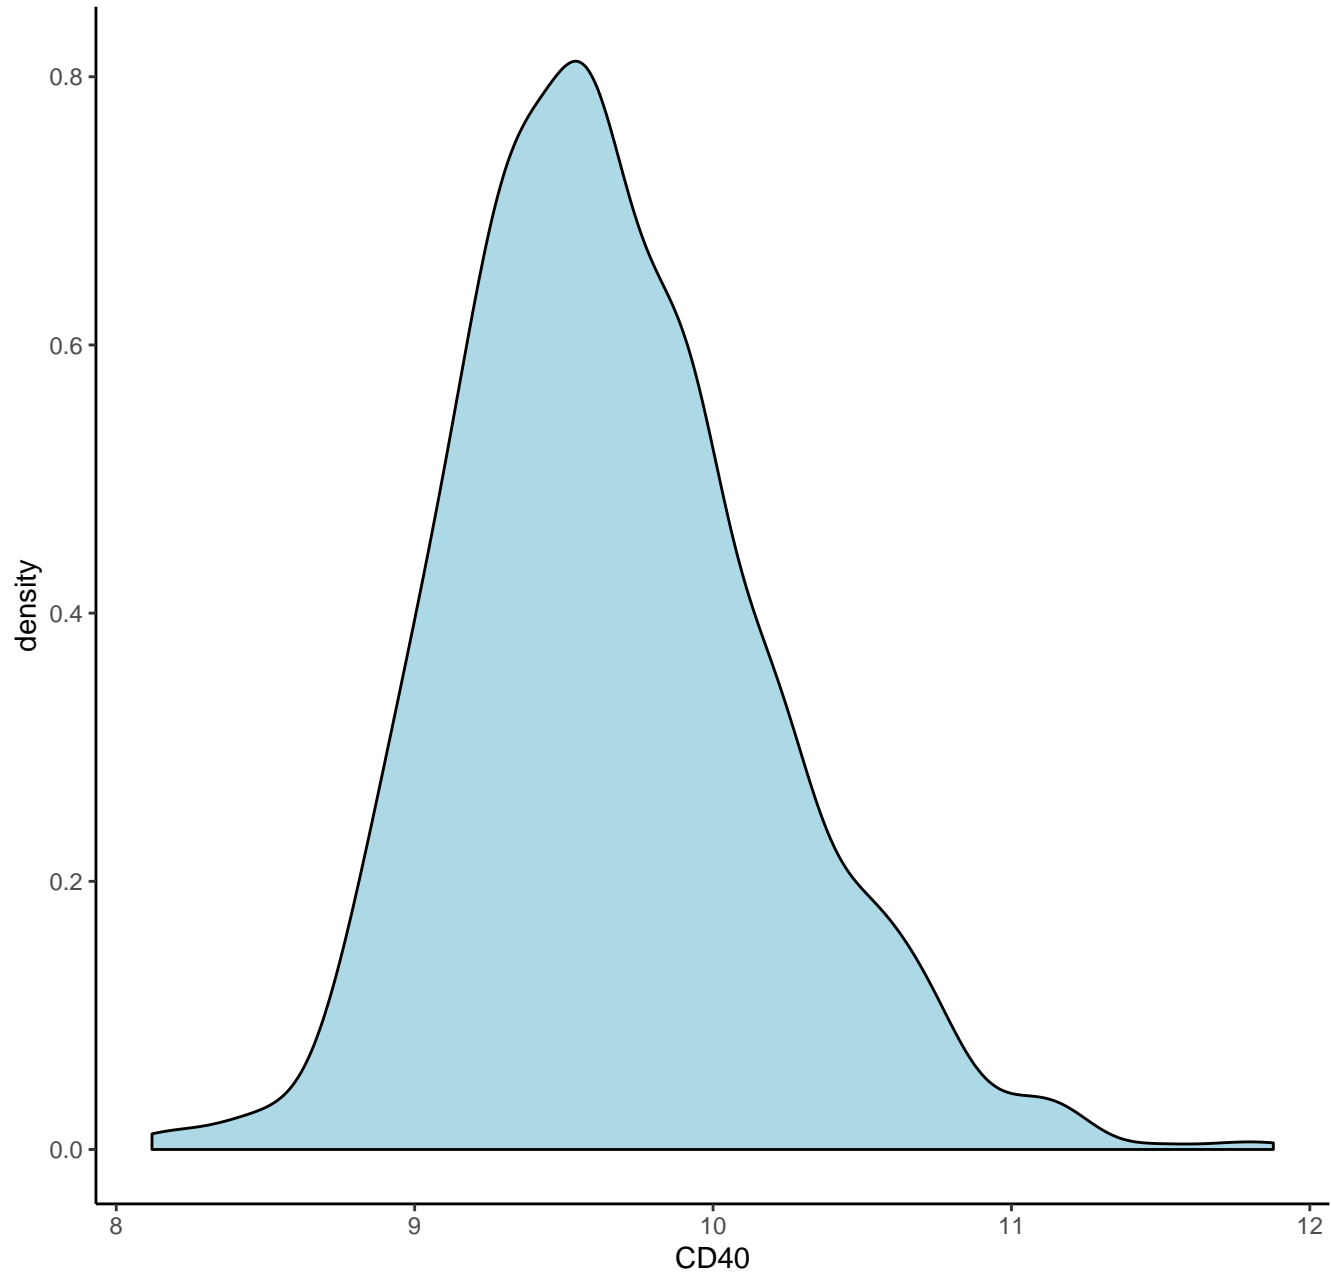

Pre-adjusted CD5 Distribution

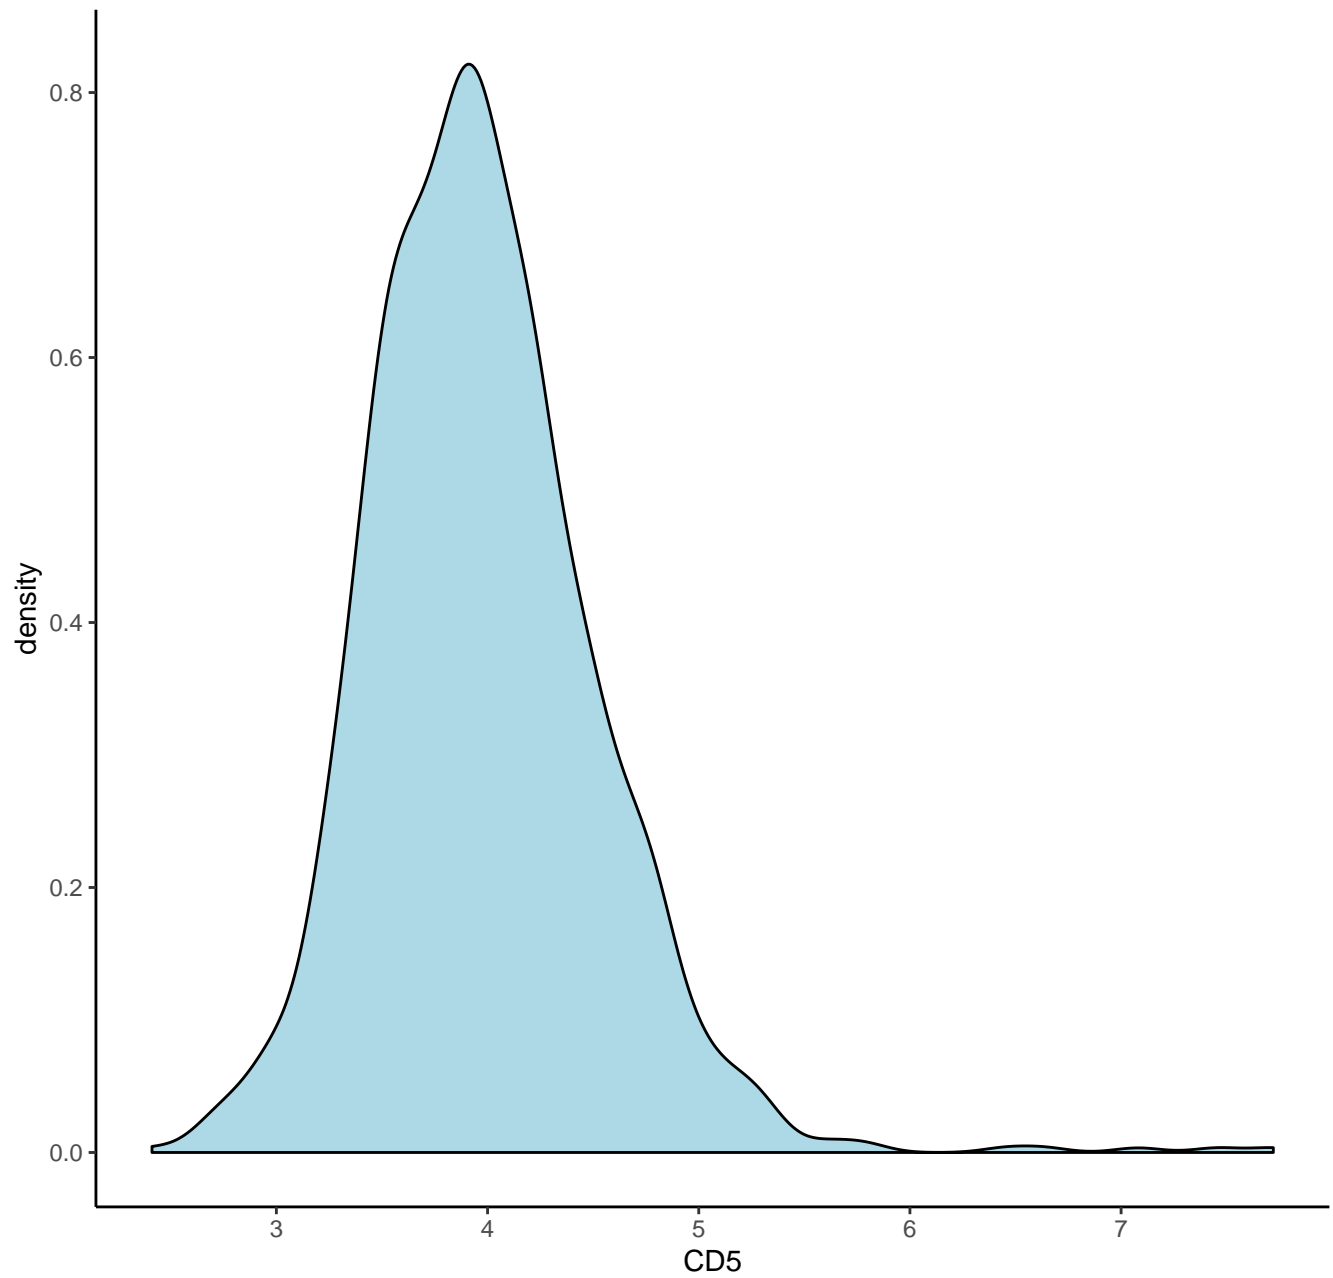

Pre-adjusted CD6 Distribution

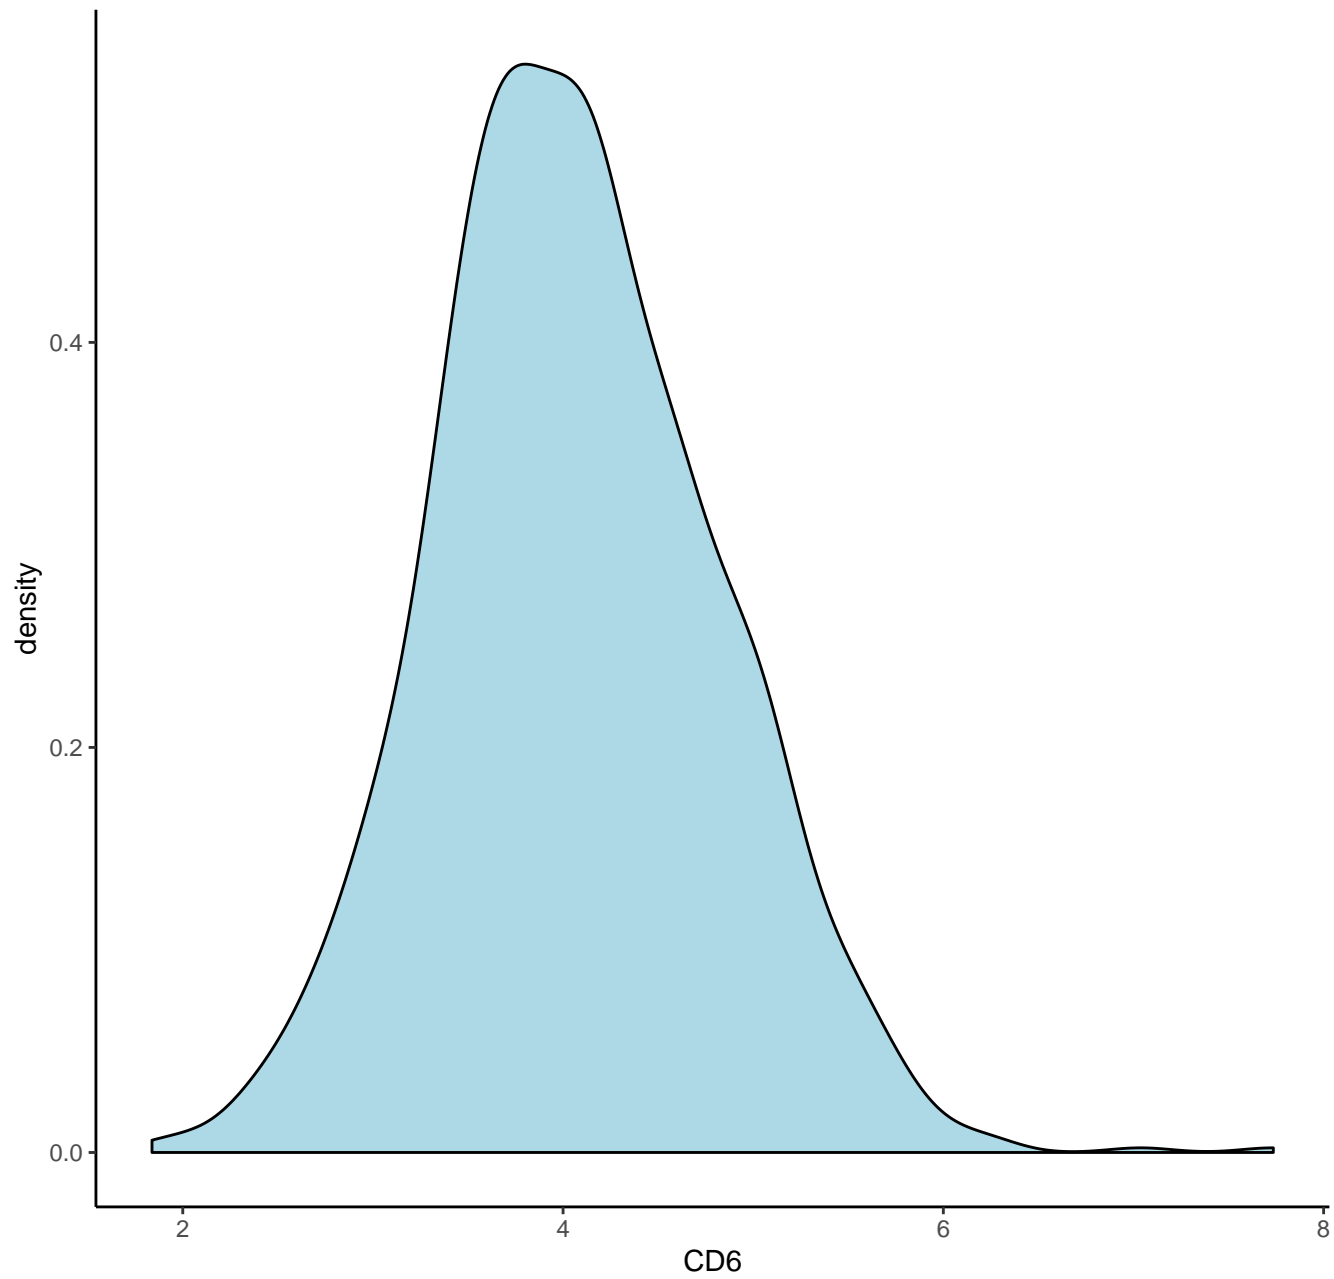



Pre-adjusted CDCP1 Distribution

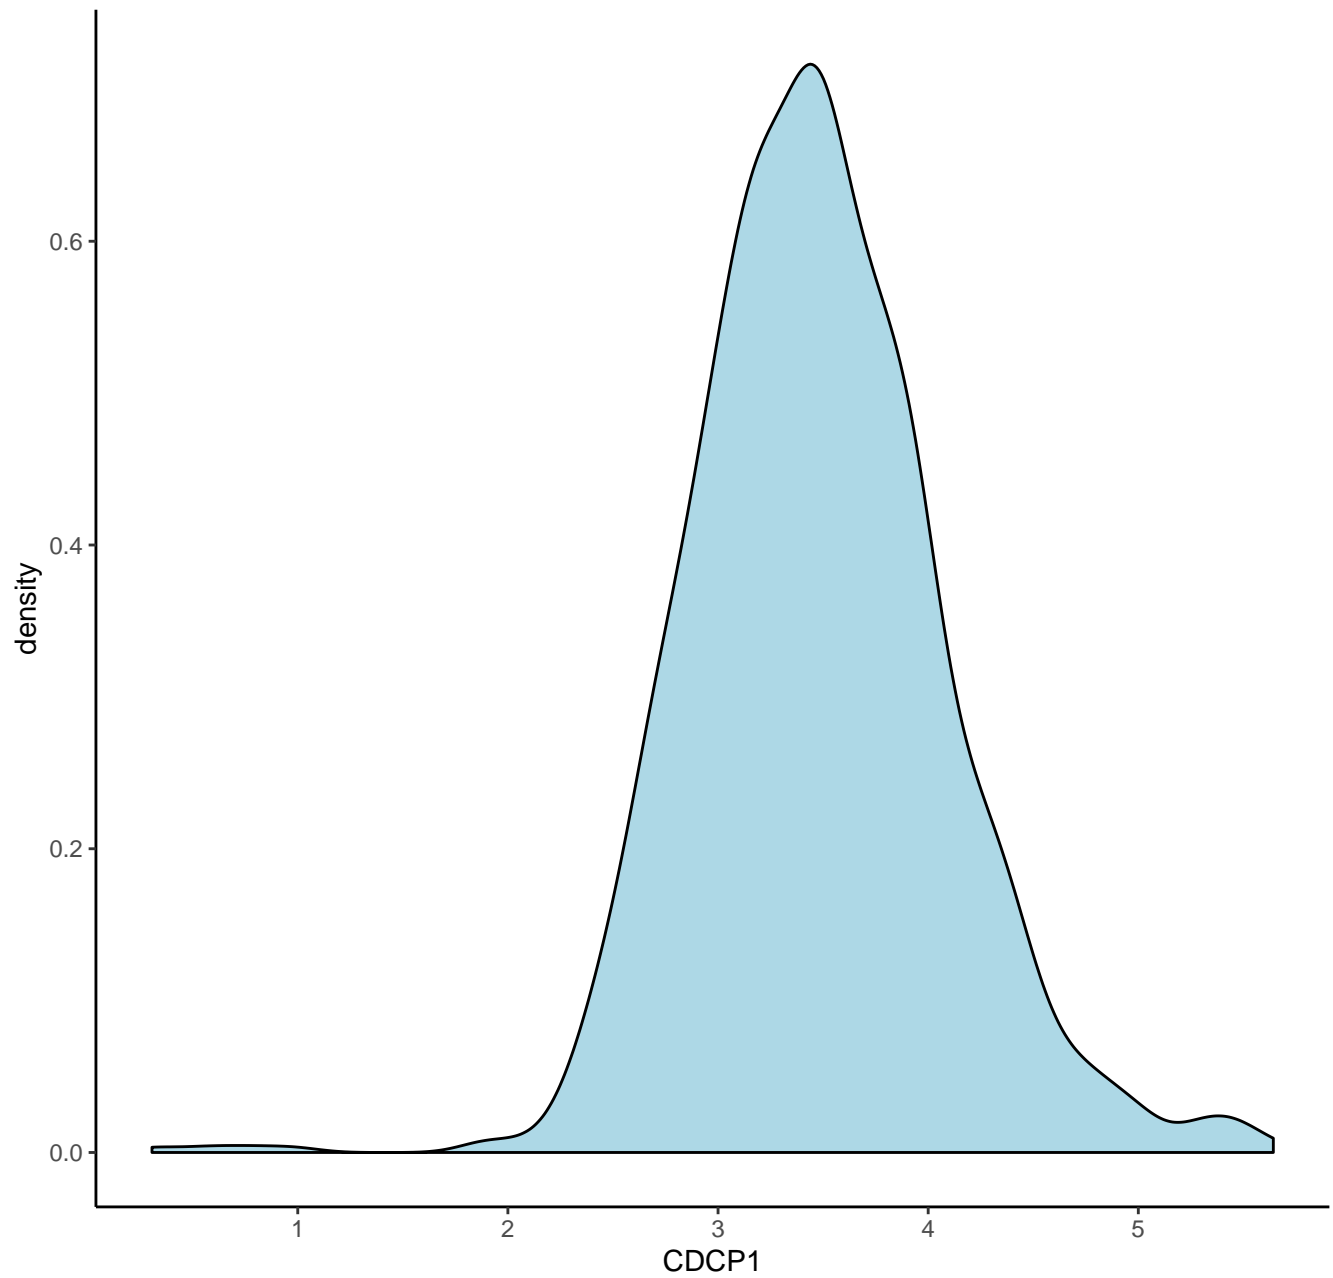

Pre-adjusted CSF.1 Distribution

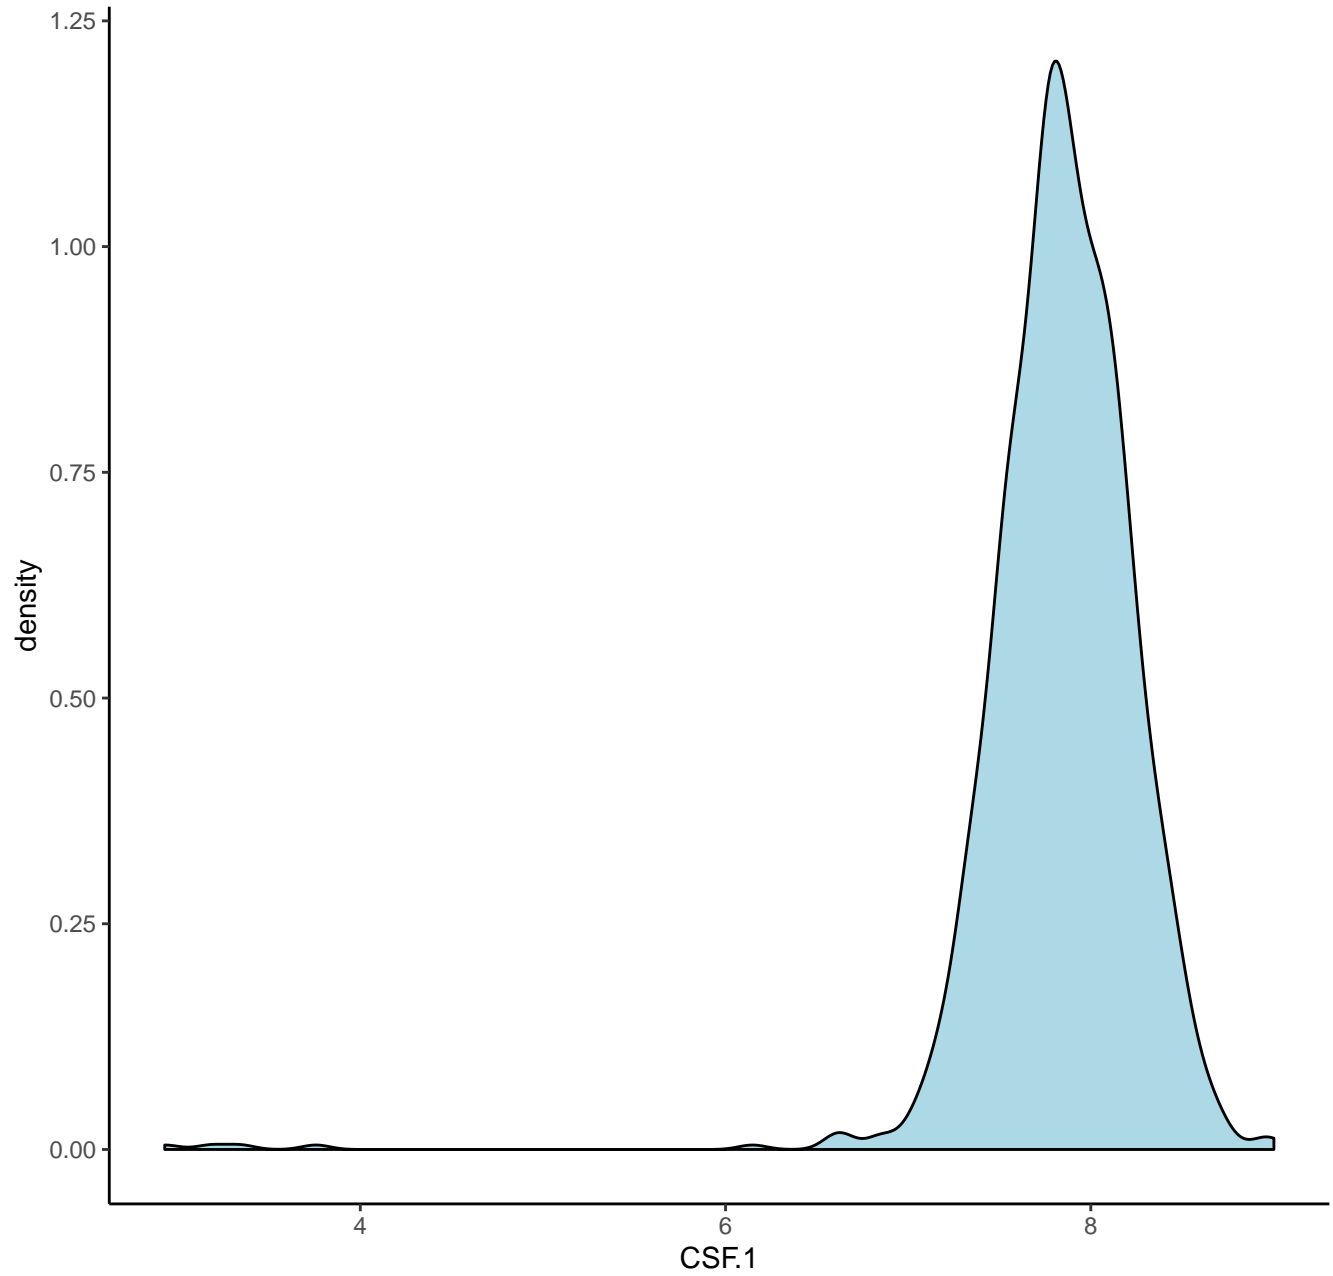

Pre-adjusted CST5 Distribution

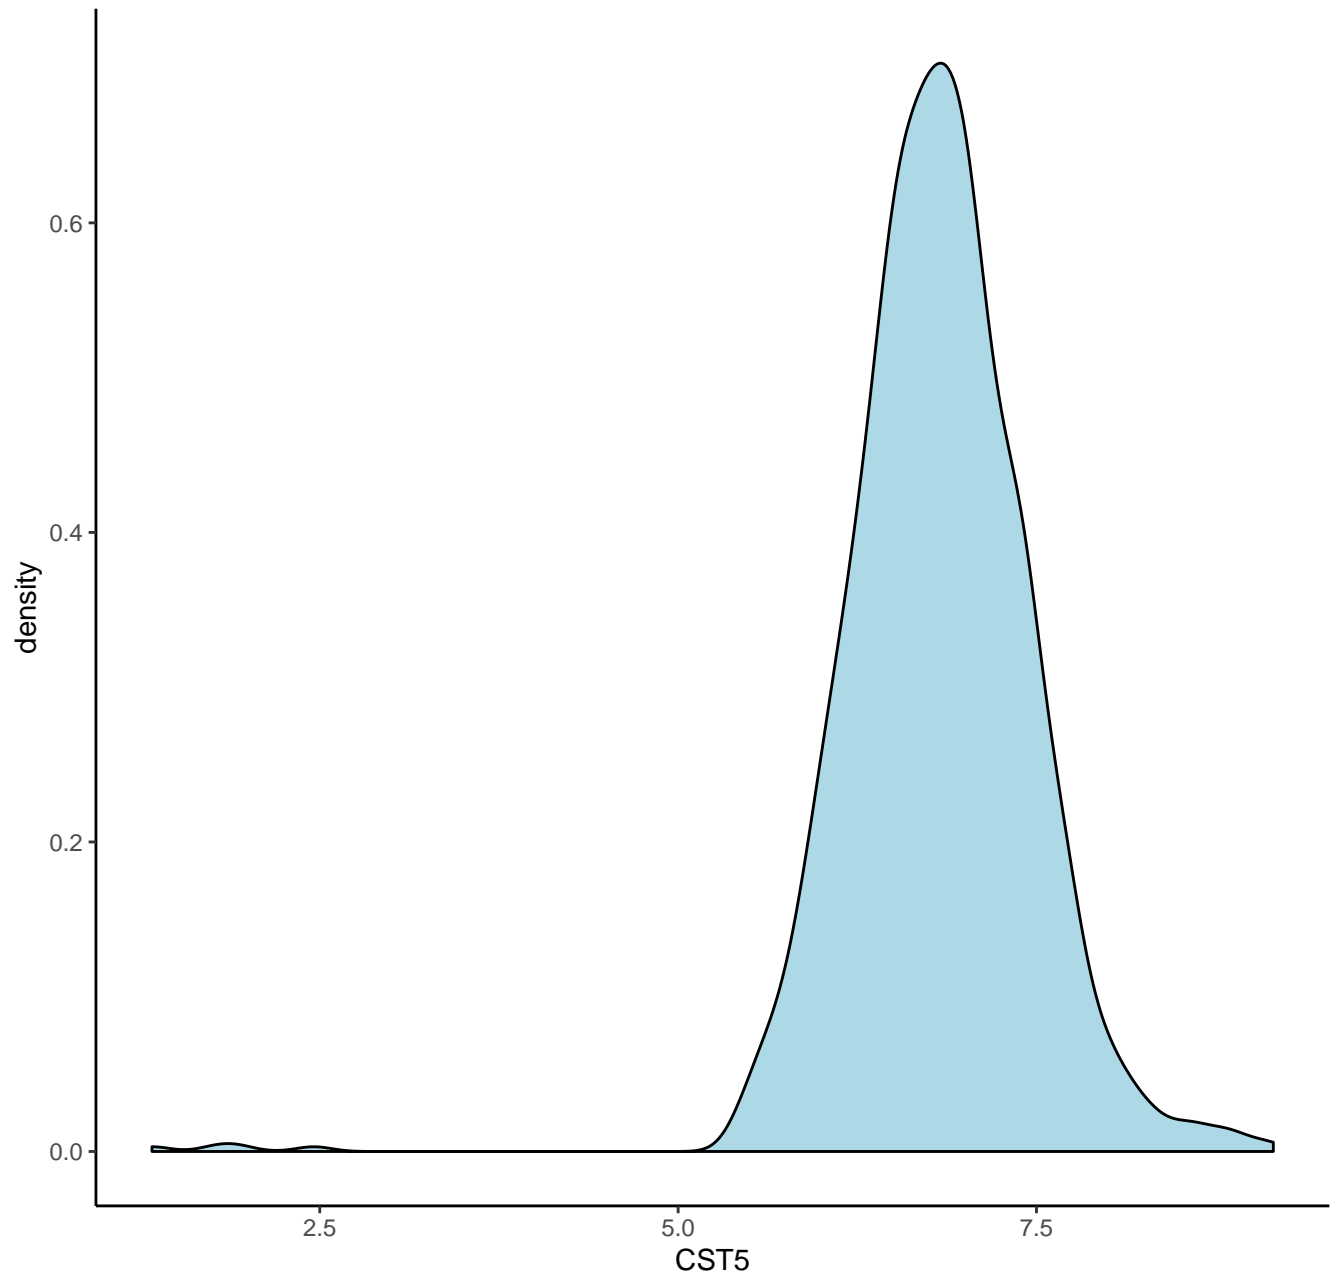

Pre-adjusted CX3CL1 Distribution

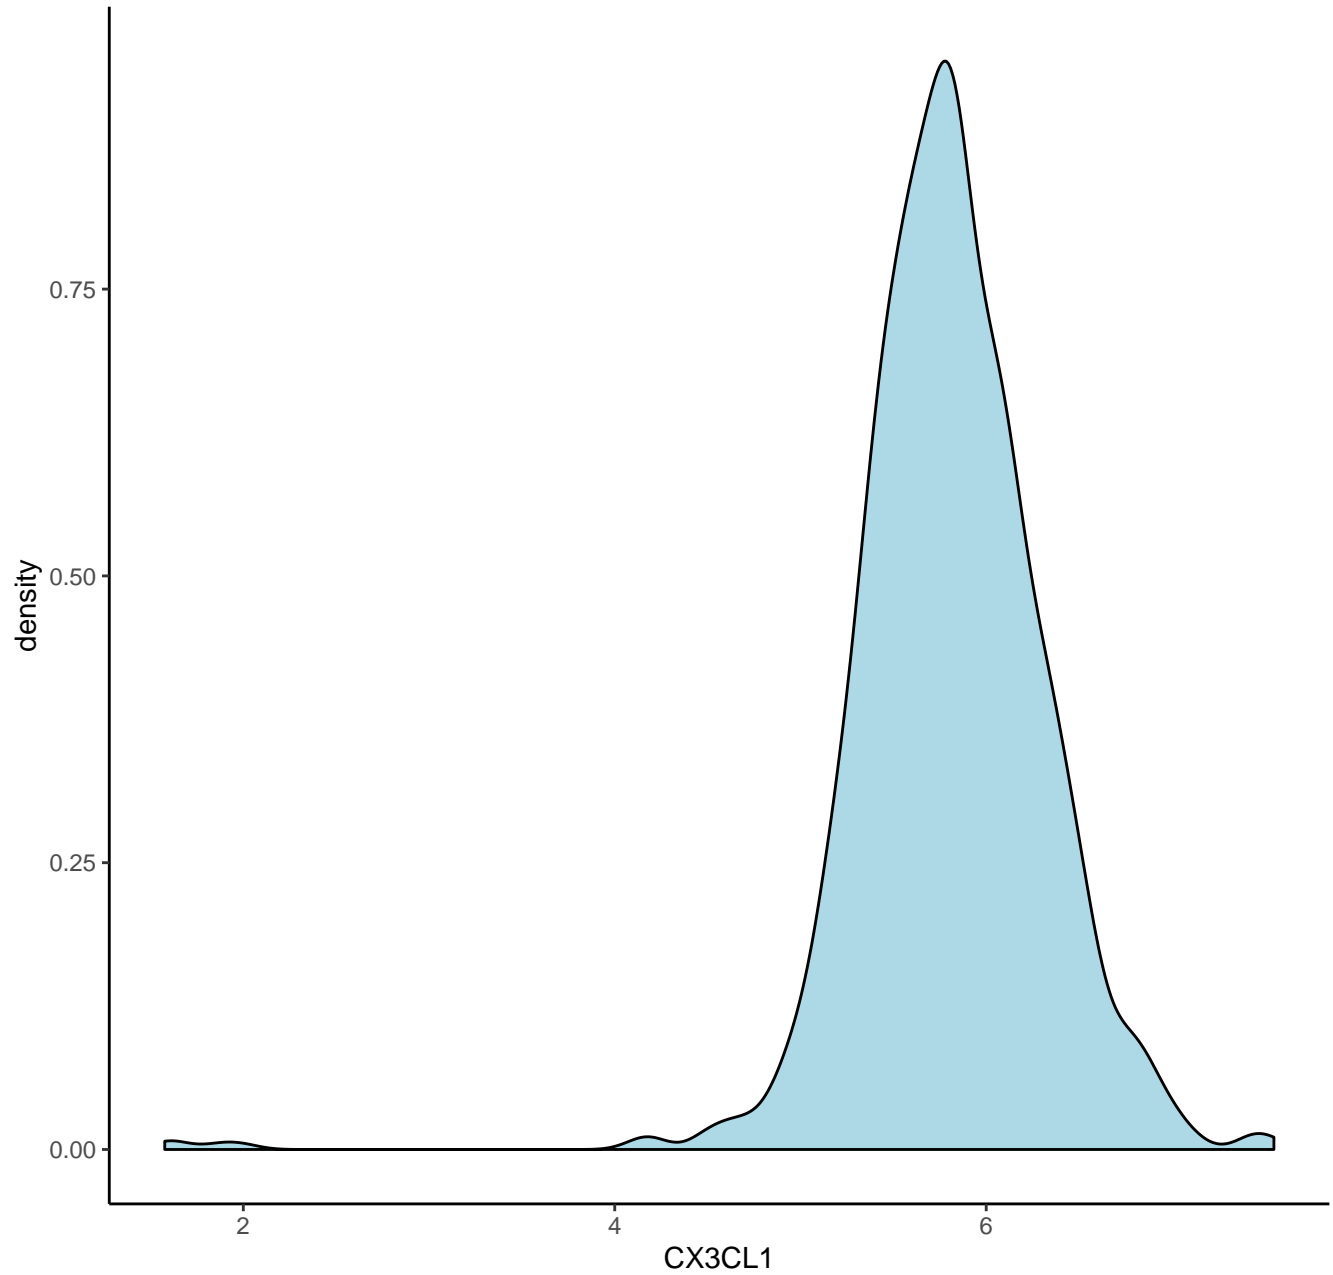

Pre-adjusted CXCL1 Distribution

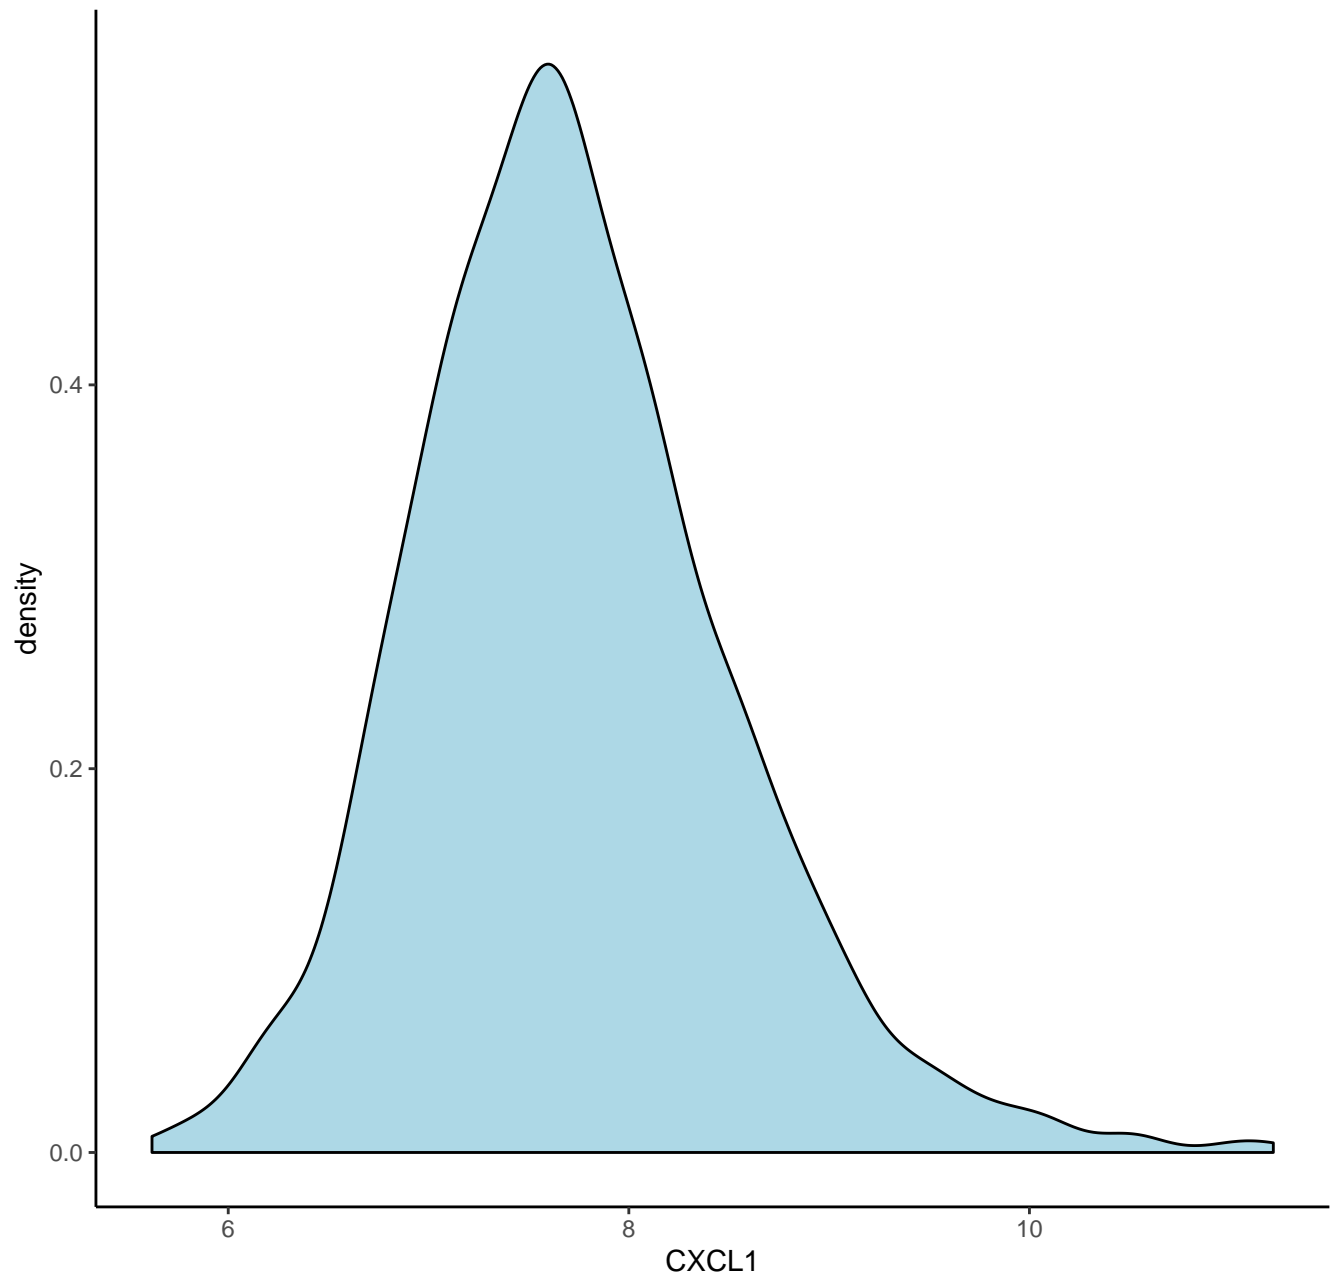

Pre-adjusted CXCL10 Distribution

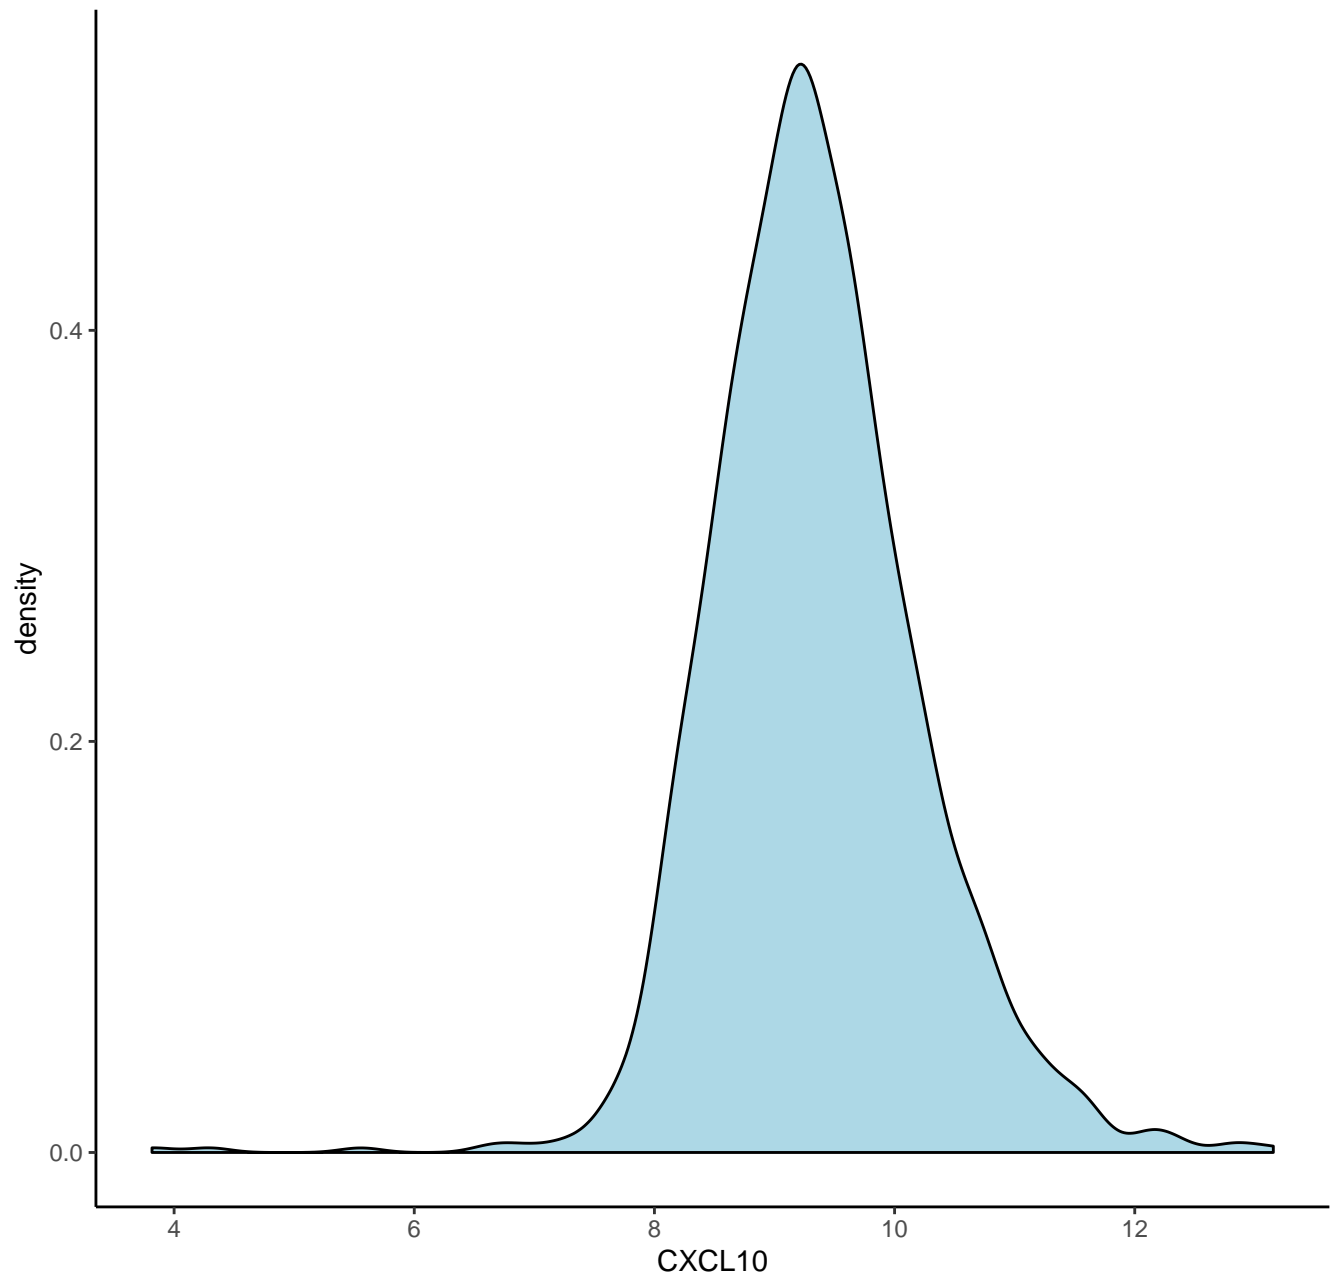

Pre-adjusted CXCL11 Distribution

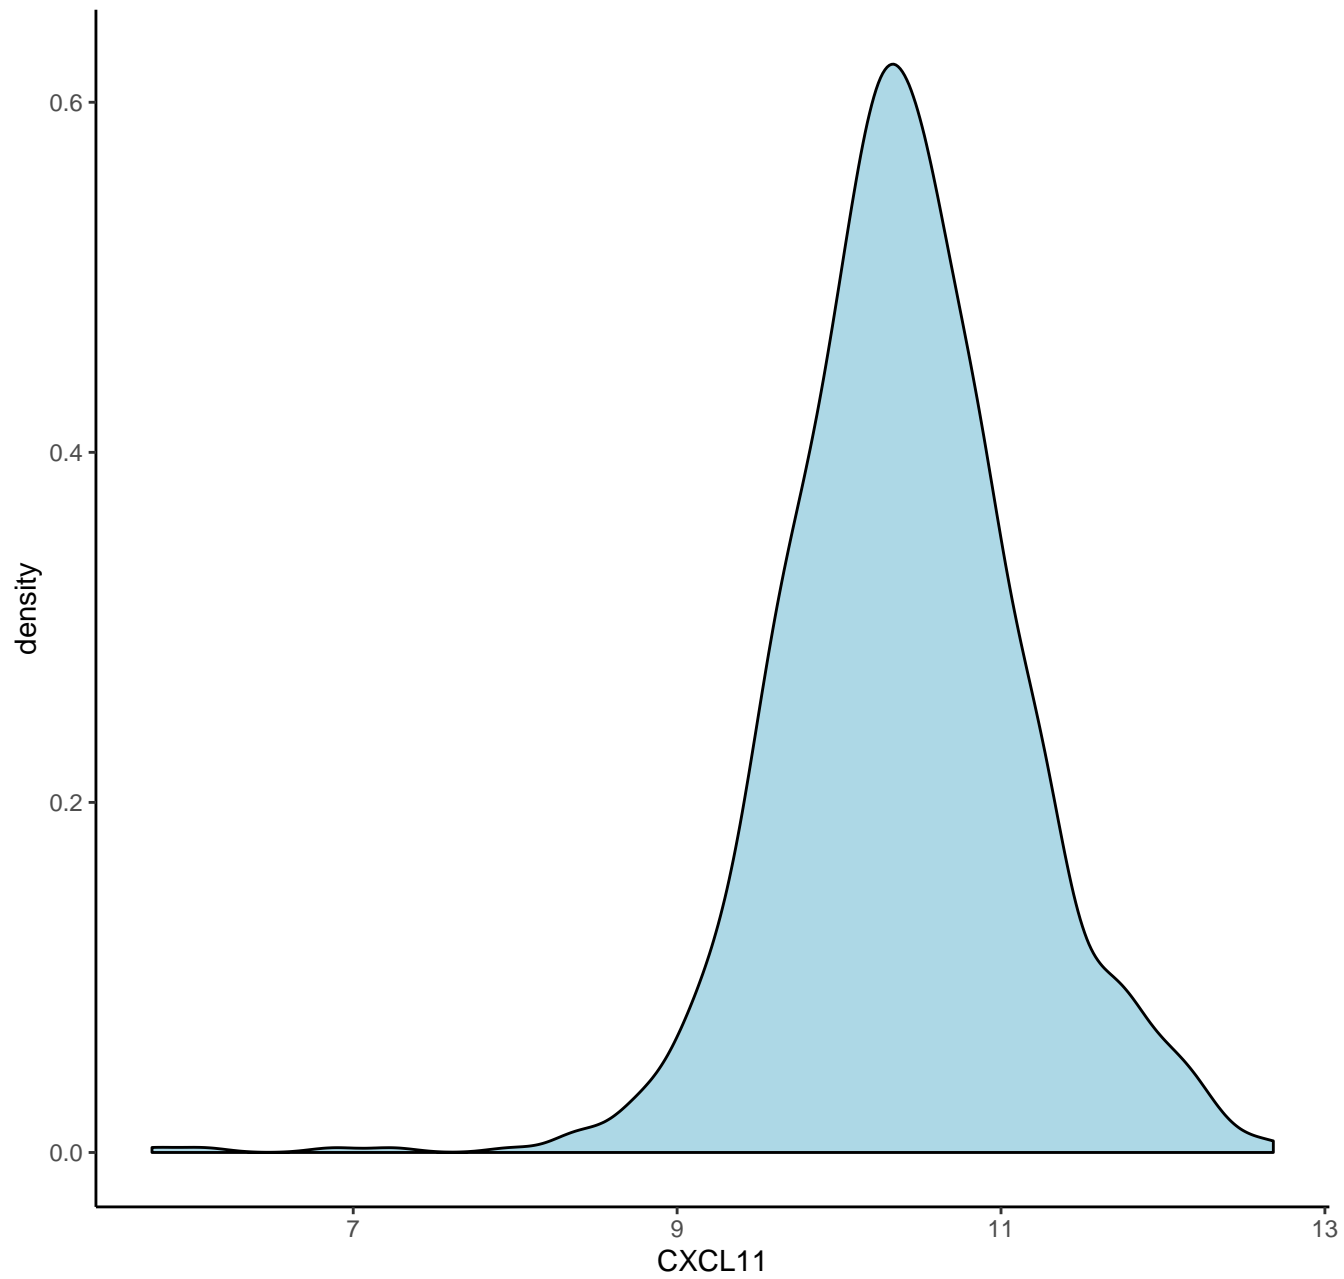

Pre-adjusted CXCL5 Distribution

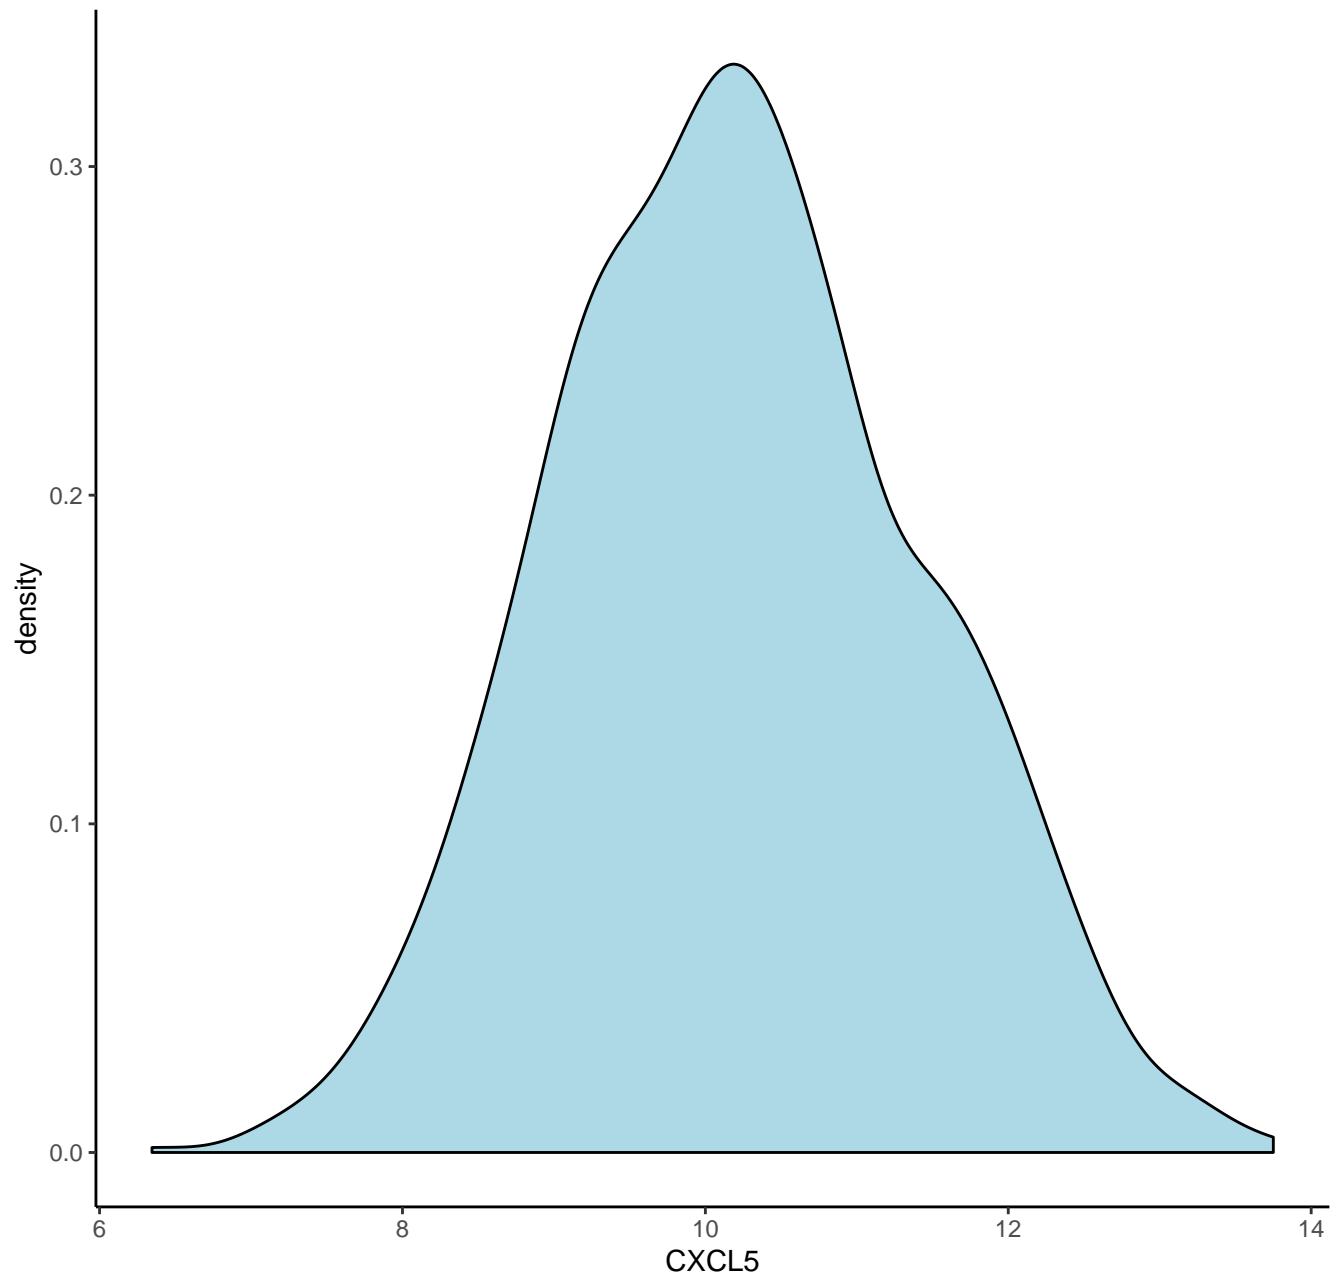



Pre-adjusted CXCL6 Distribution

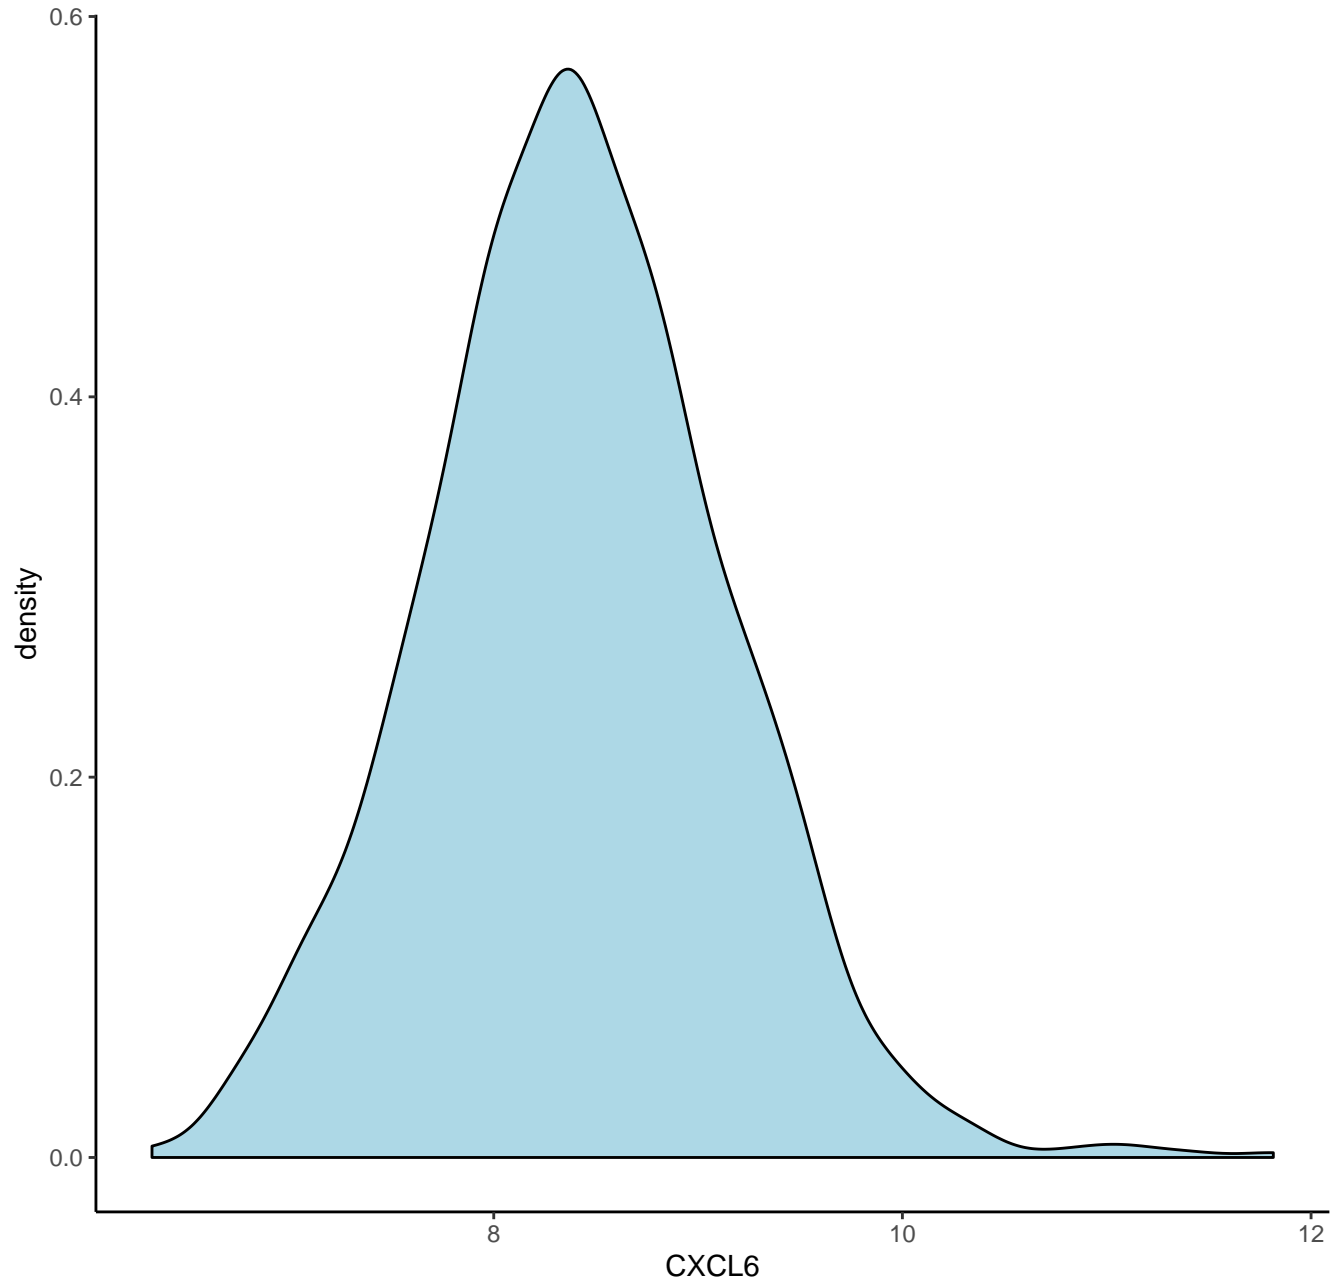

Pre-adjusted CXCL9 Distribution

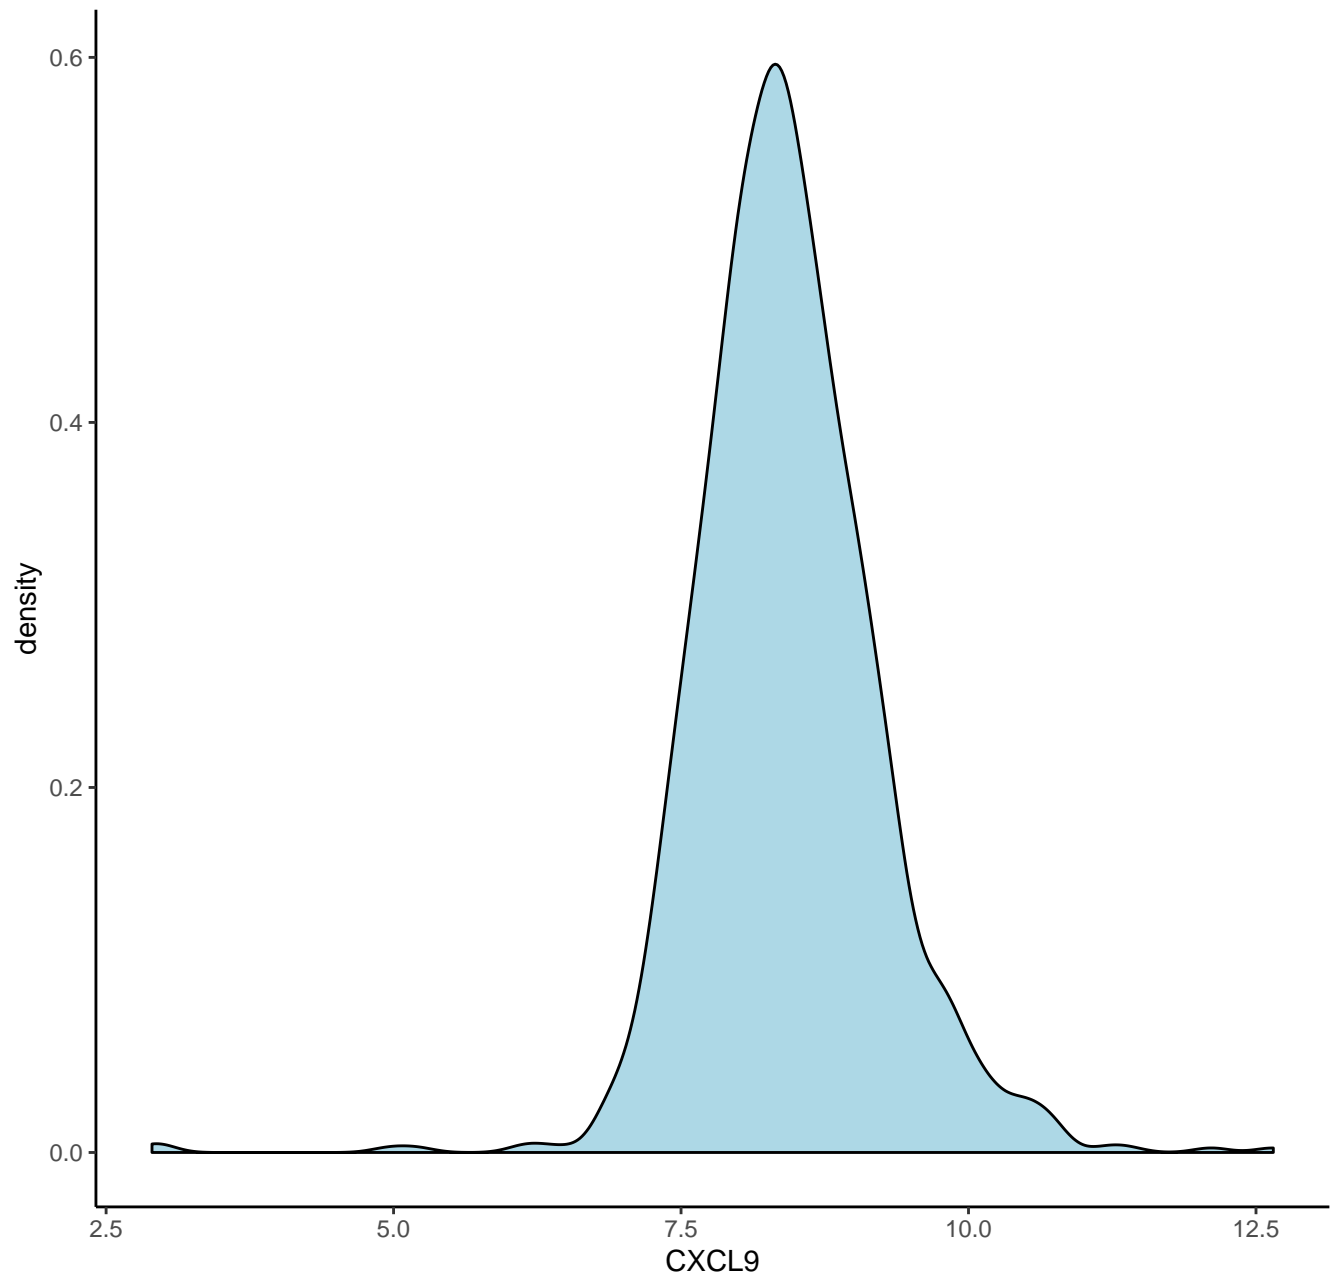

Pre-adjusted DNER Distribution

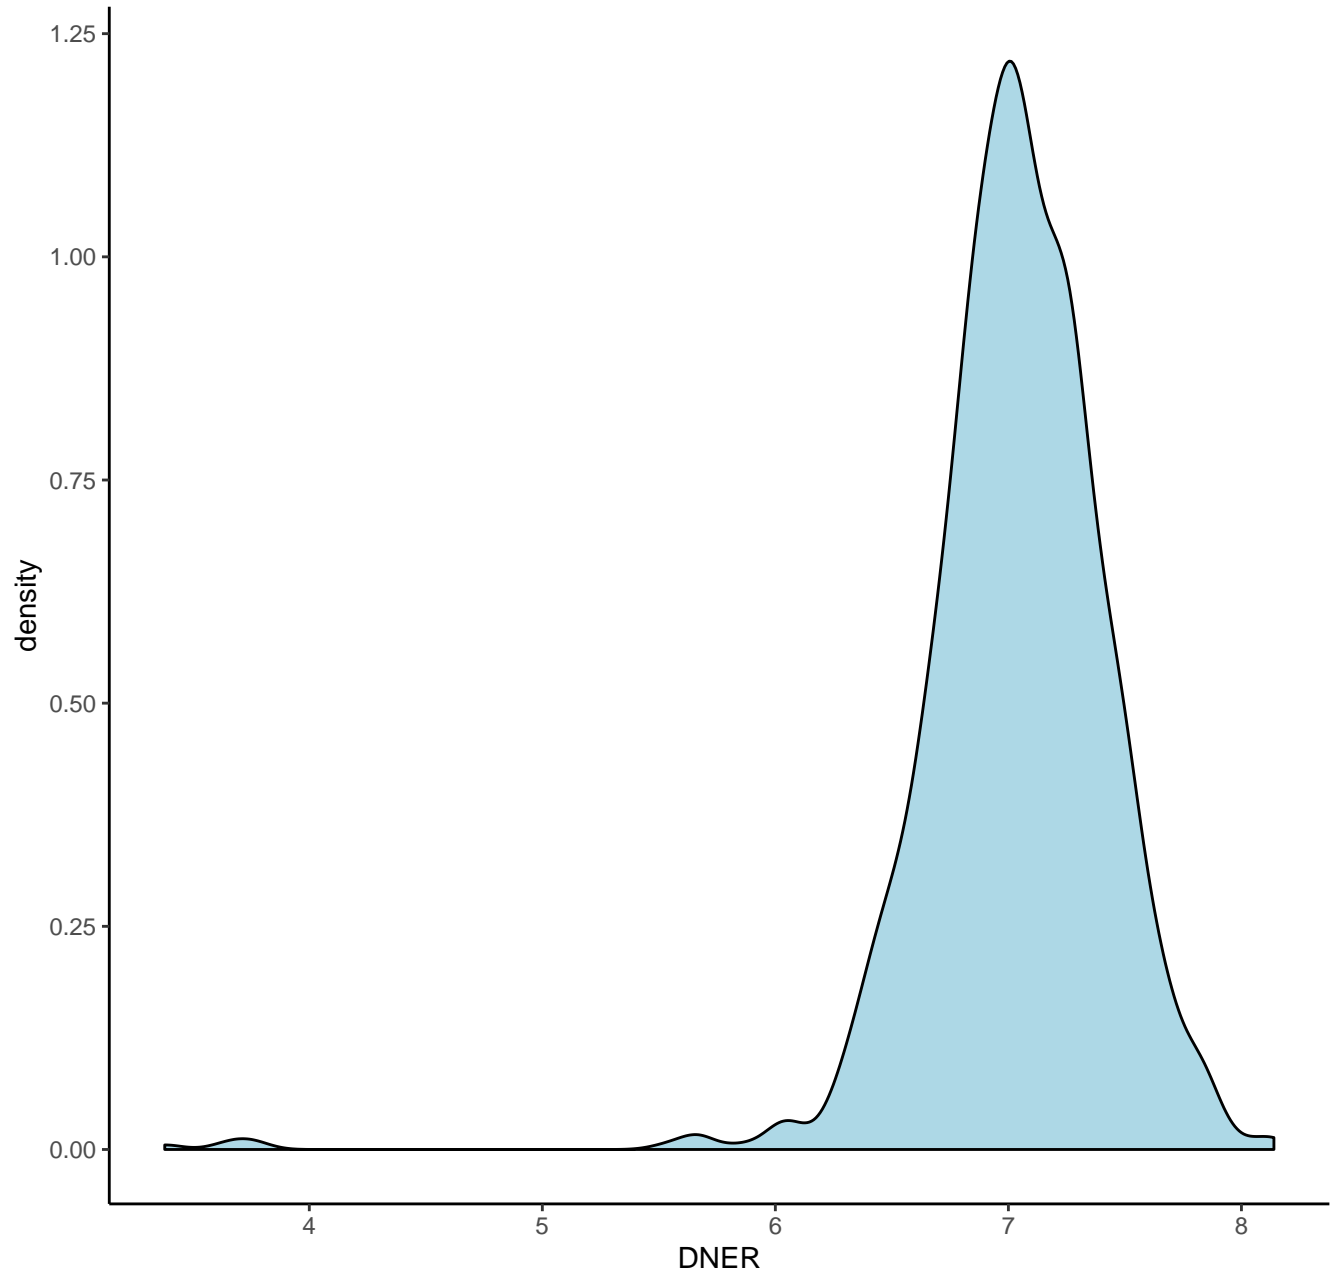

Pre-adjusted EN.RAGE Distribution

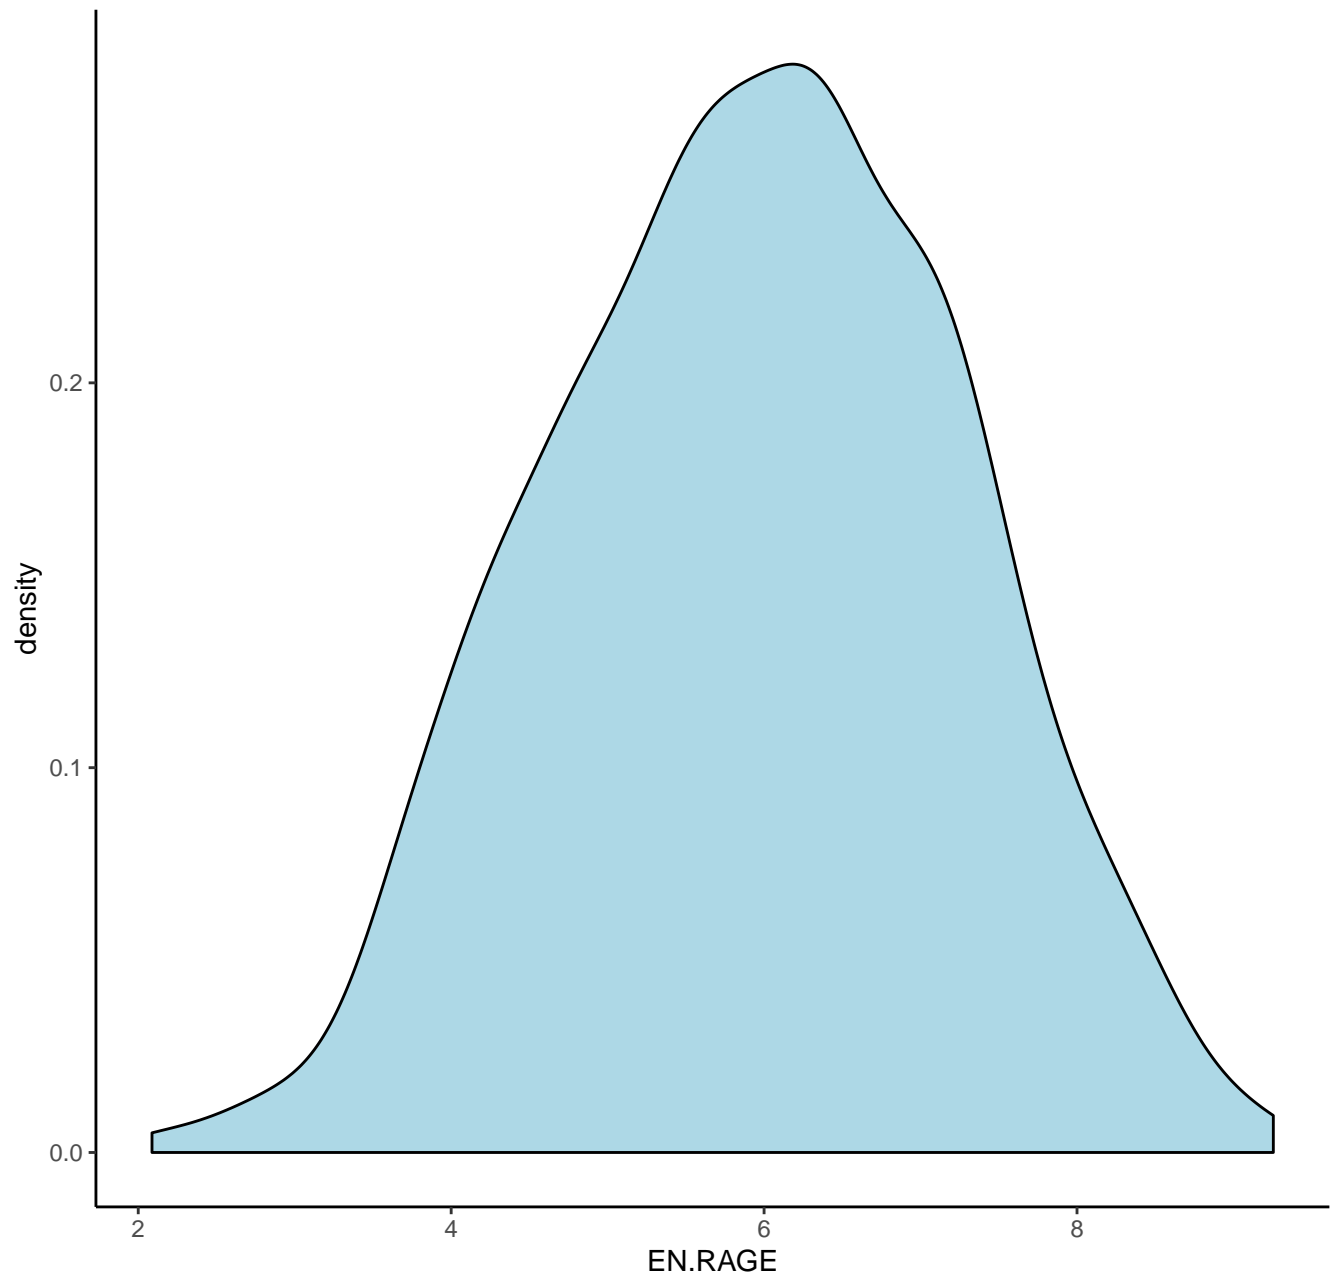

Pre-adjusted FGF.19 Distribution

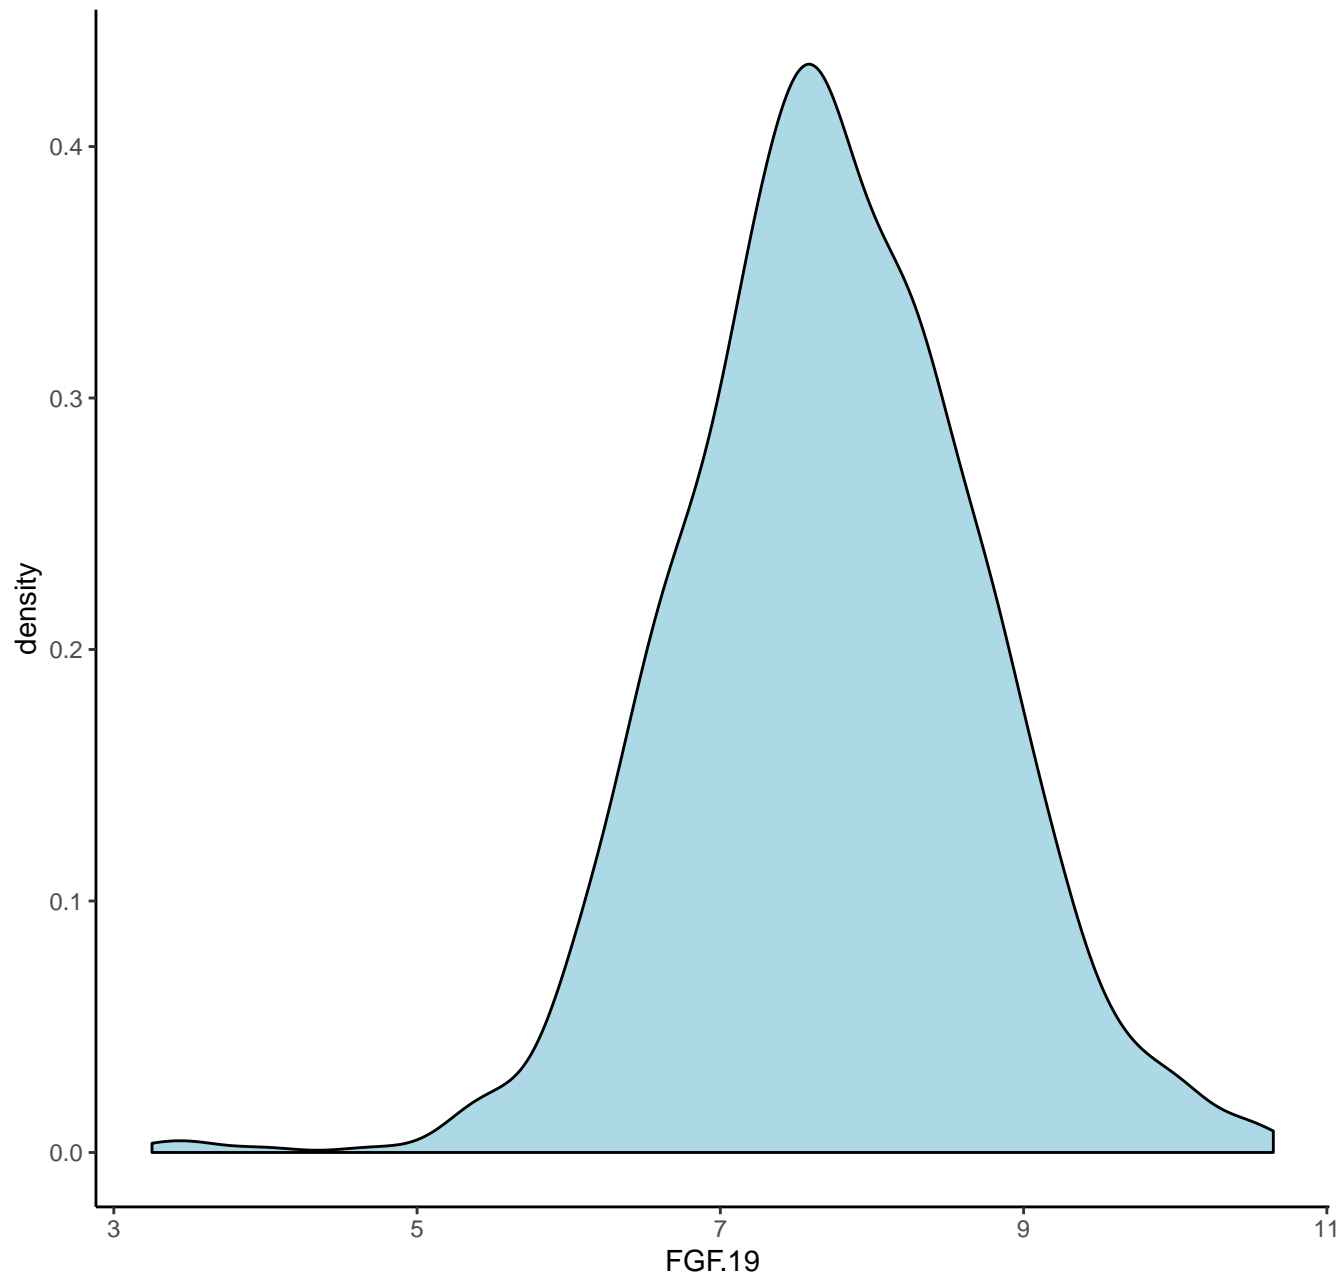

Pre-adjusted FGF.21 Distribution

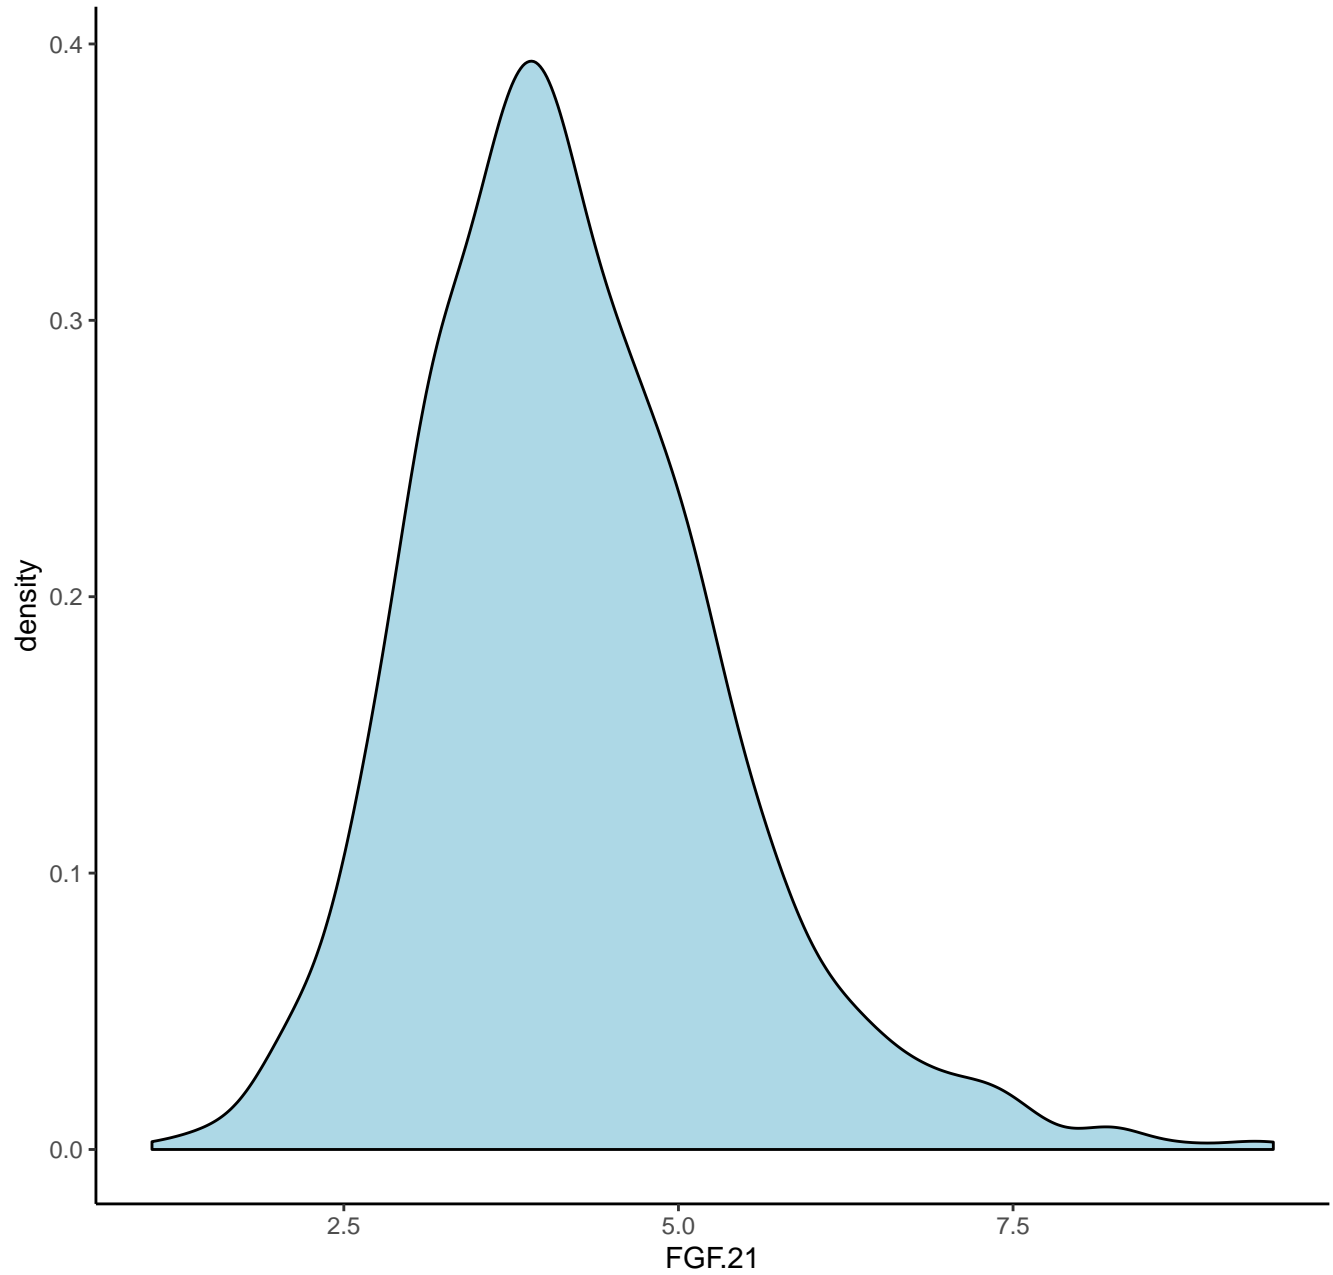

Pre-adjusted FGF.23 Distribution

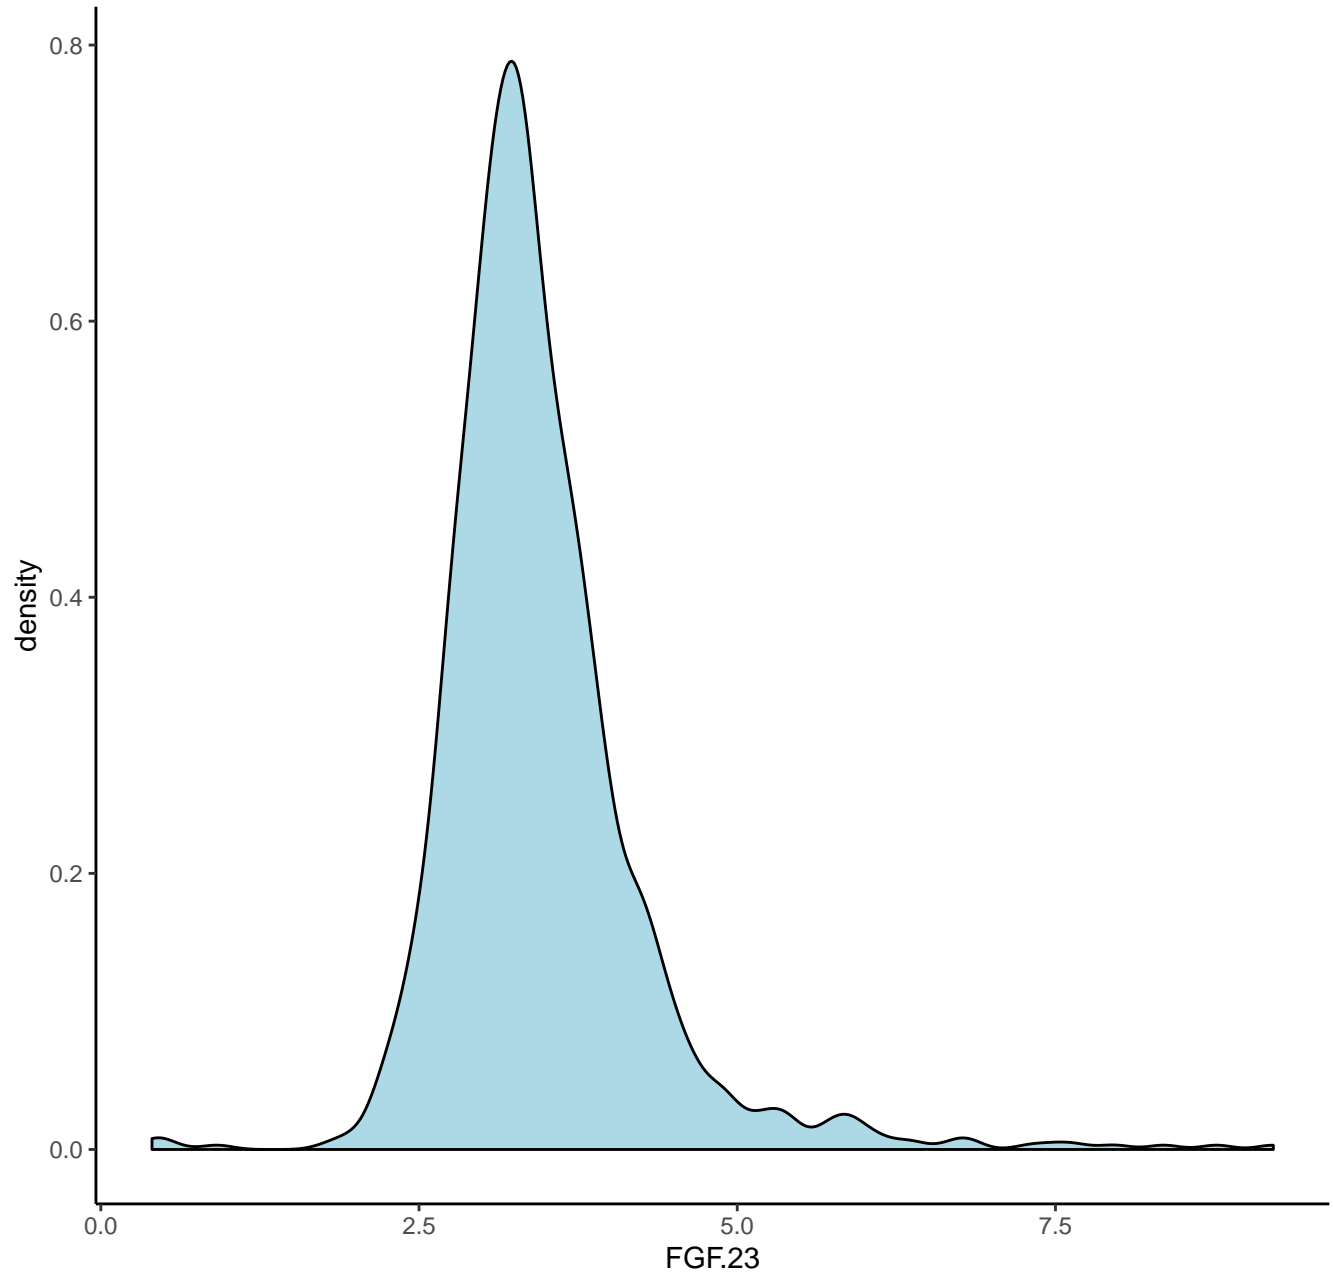

Pre-adjusted FGF.5 Distribution

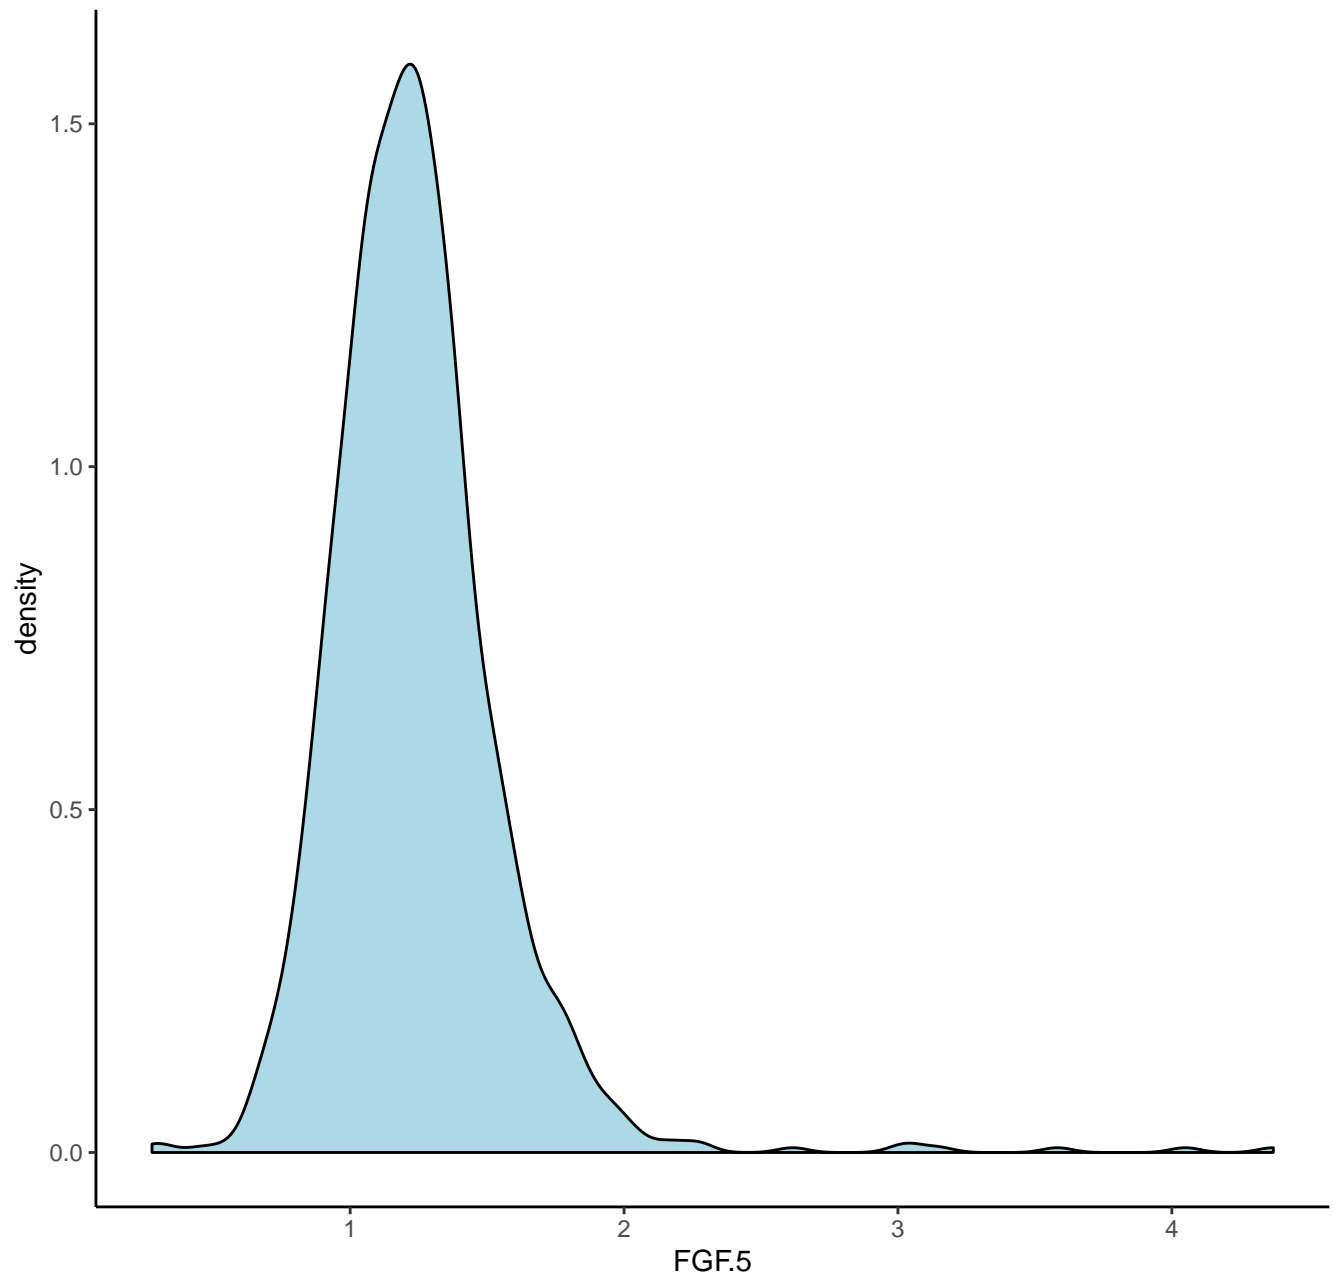



Pre-adjusted Flt3L Distribution

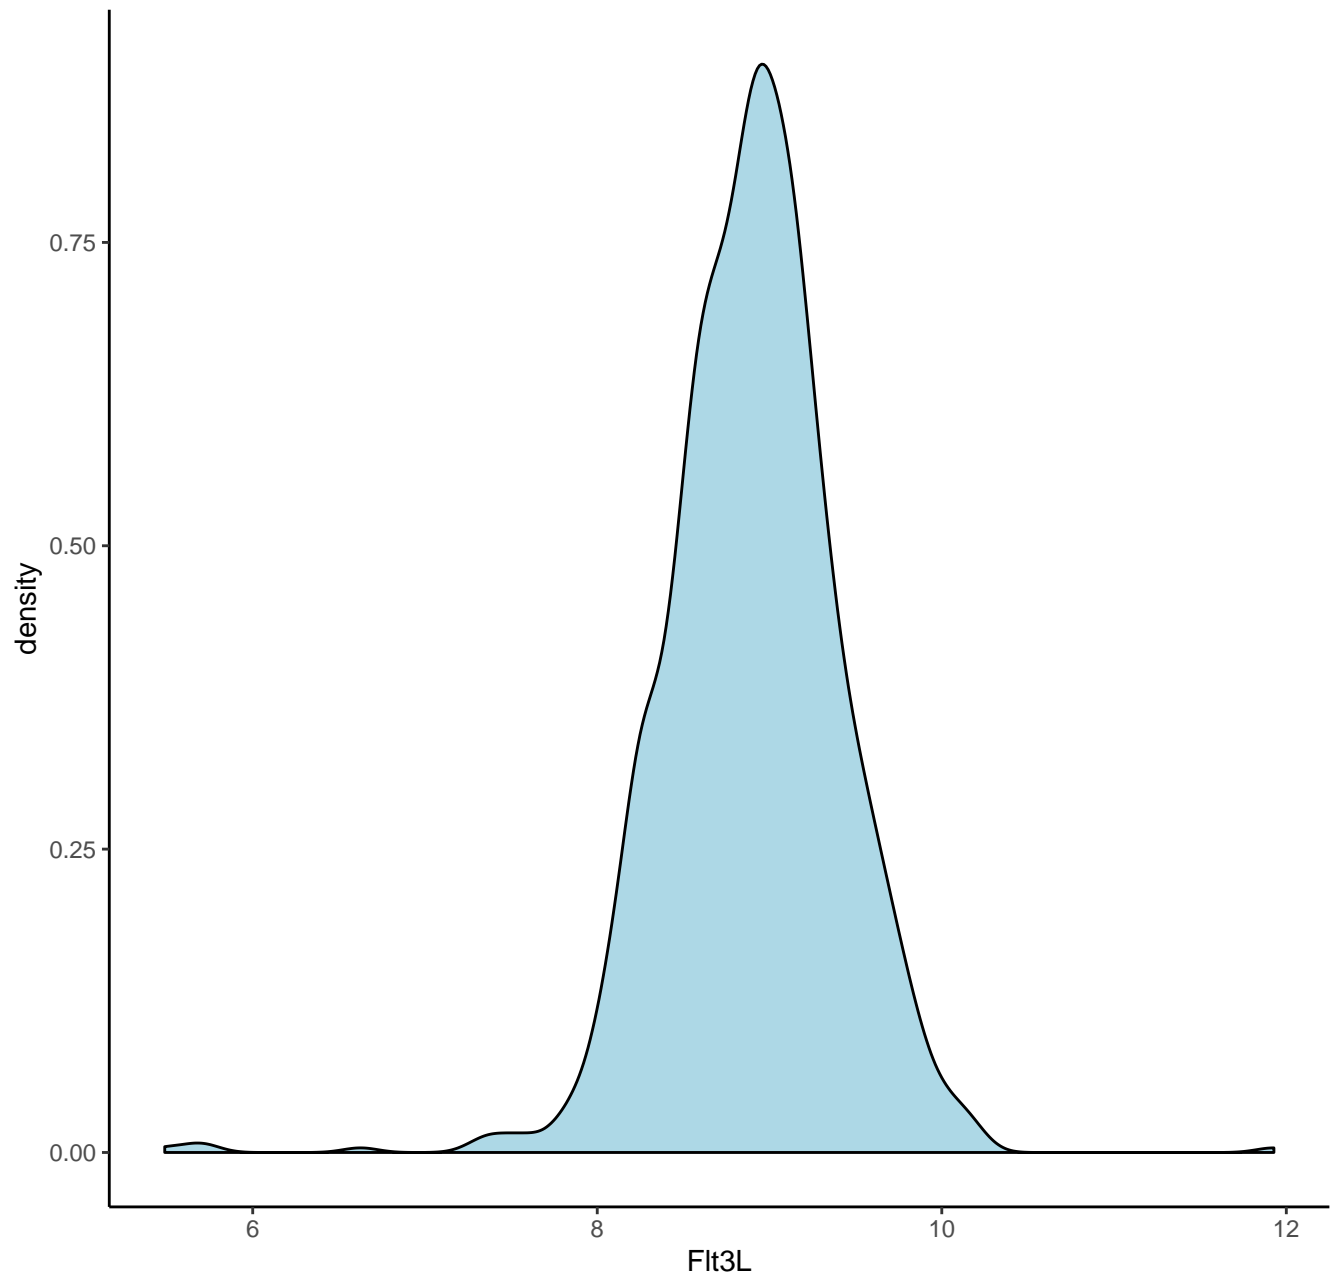

Pre-adjusted HGF Distribution

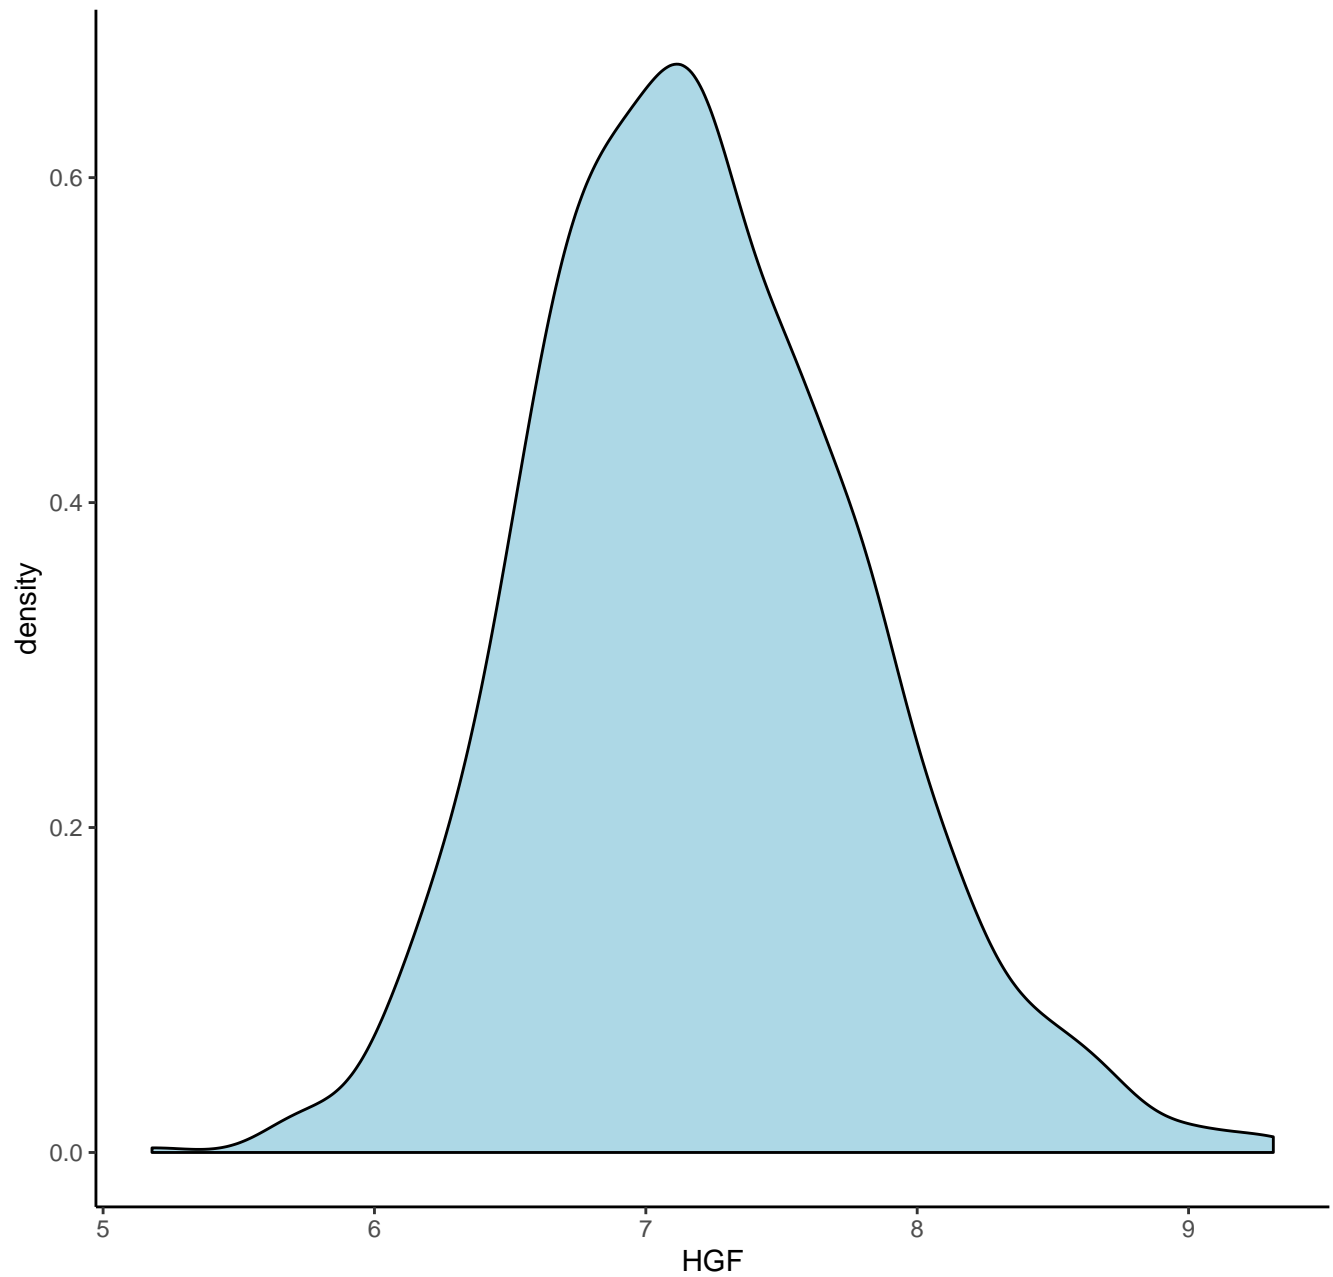

Pre-adjusted IL.10RB Distribution

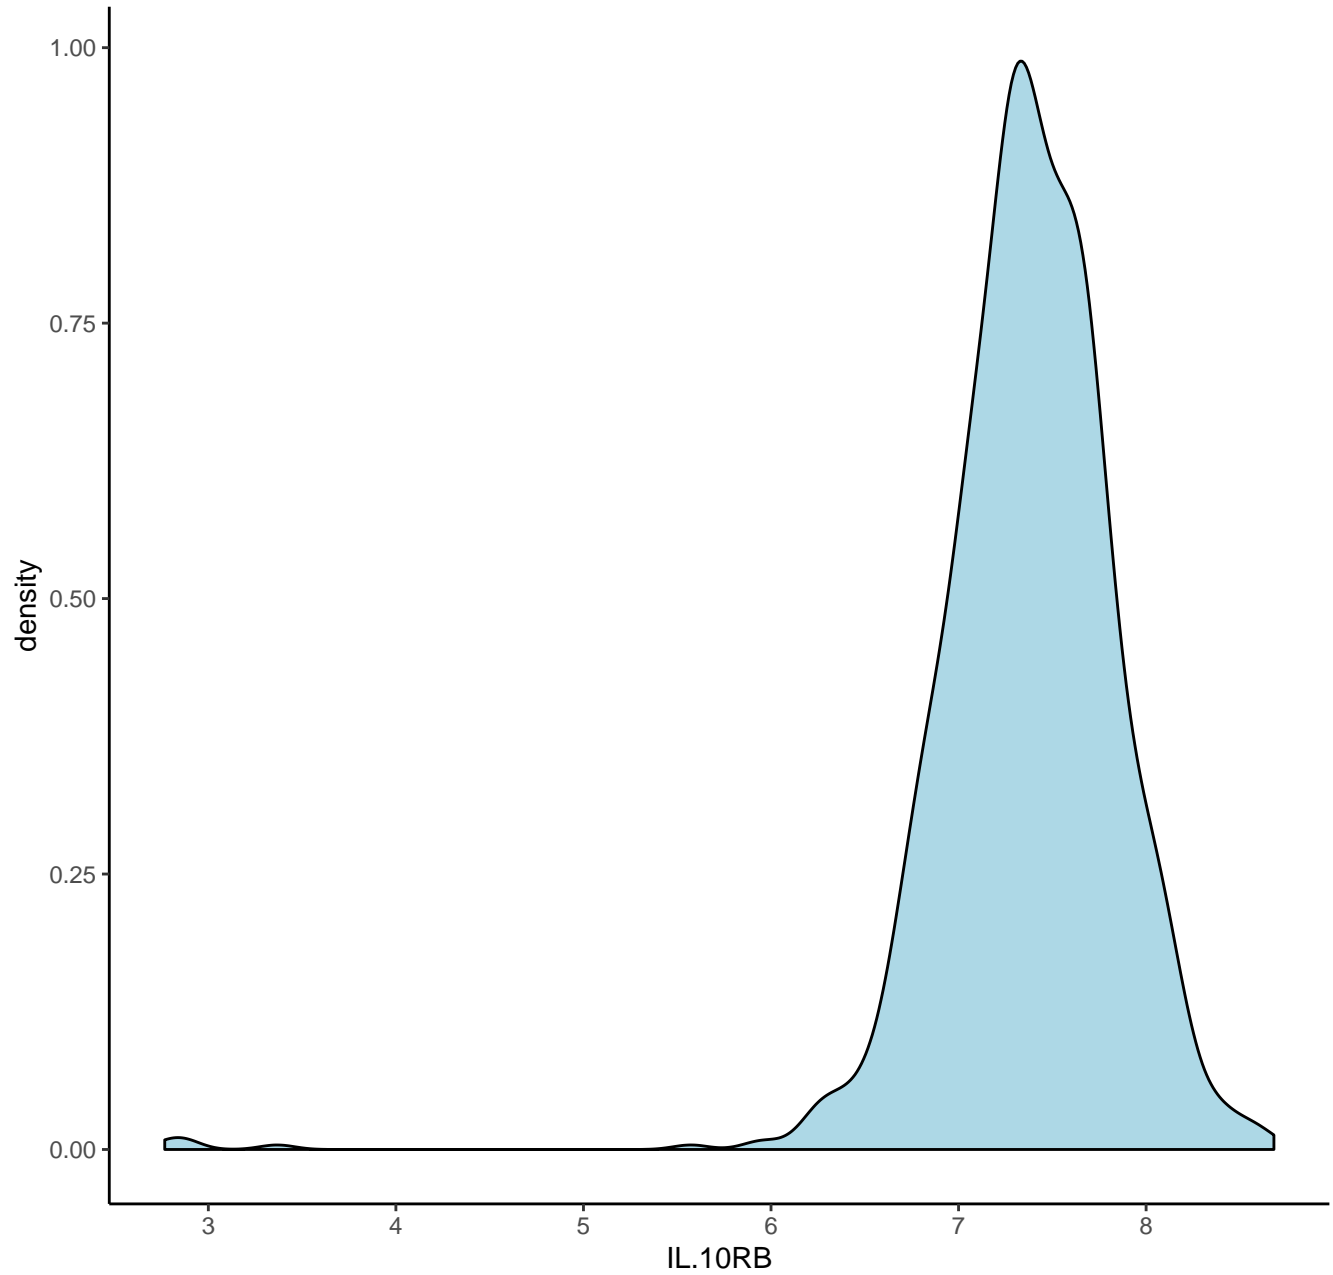

Pre-adjusted IL.12B Distribution

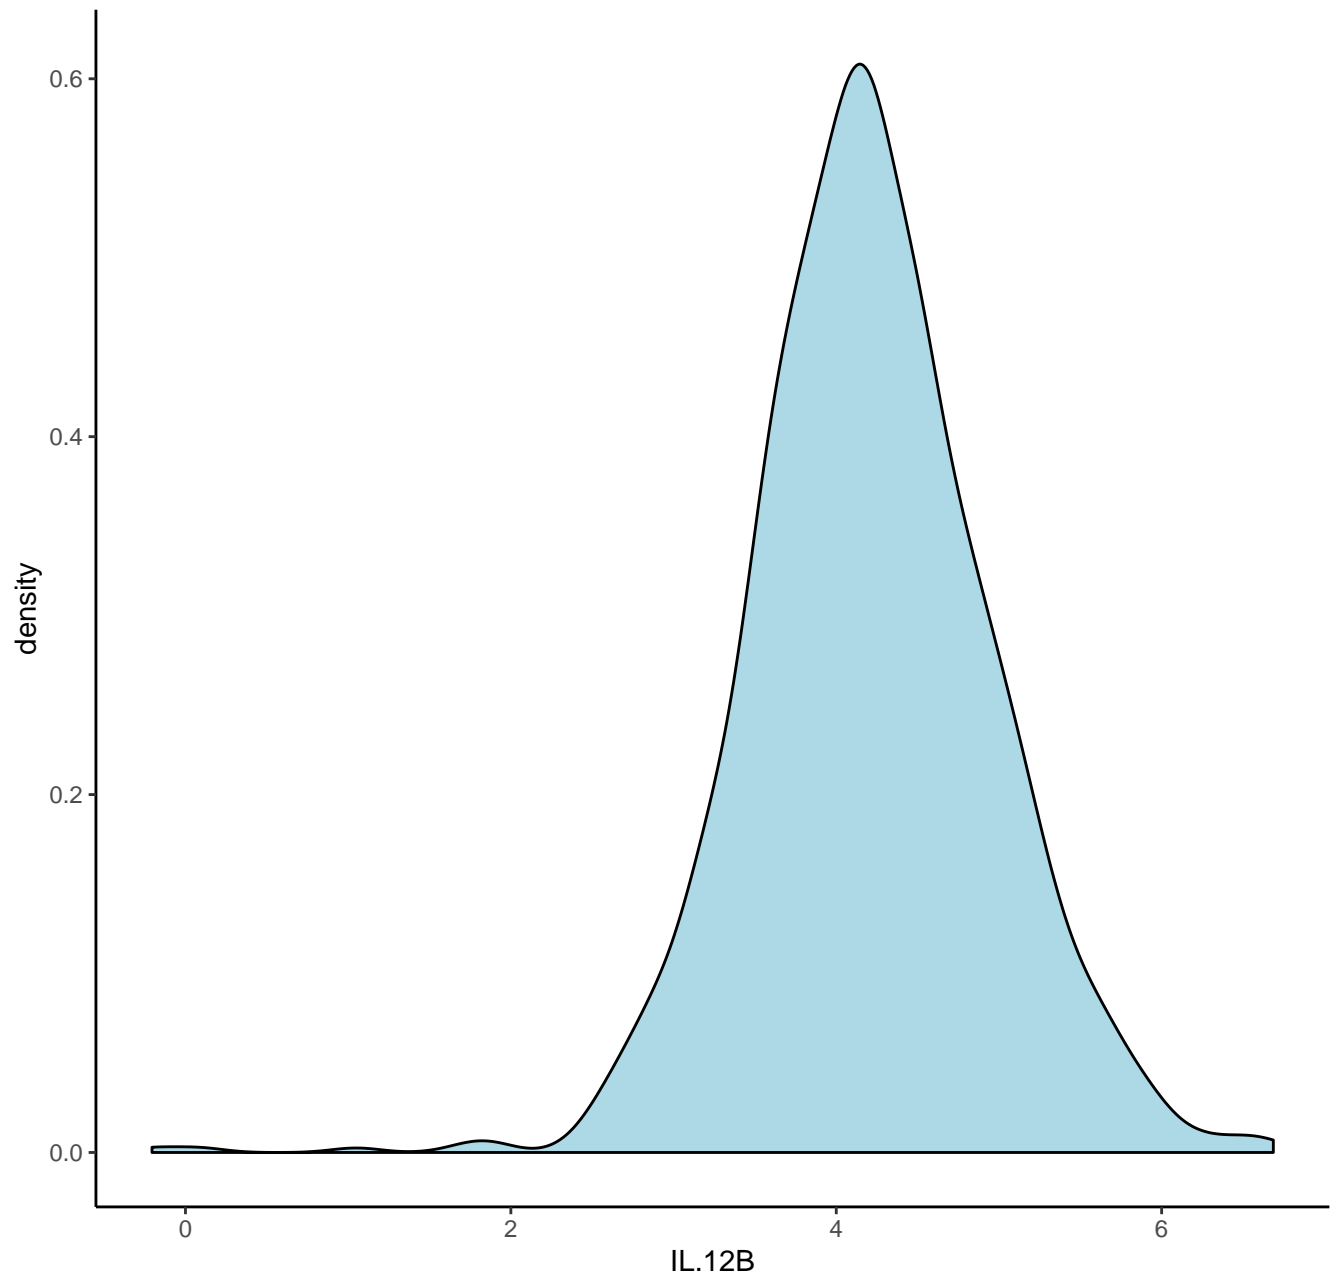

Pre-adjusted IL.15RA Distribution

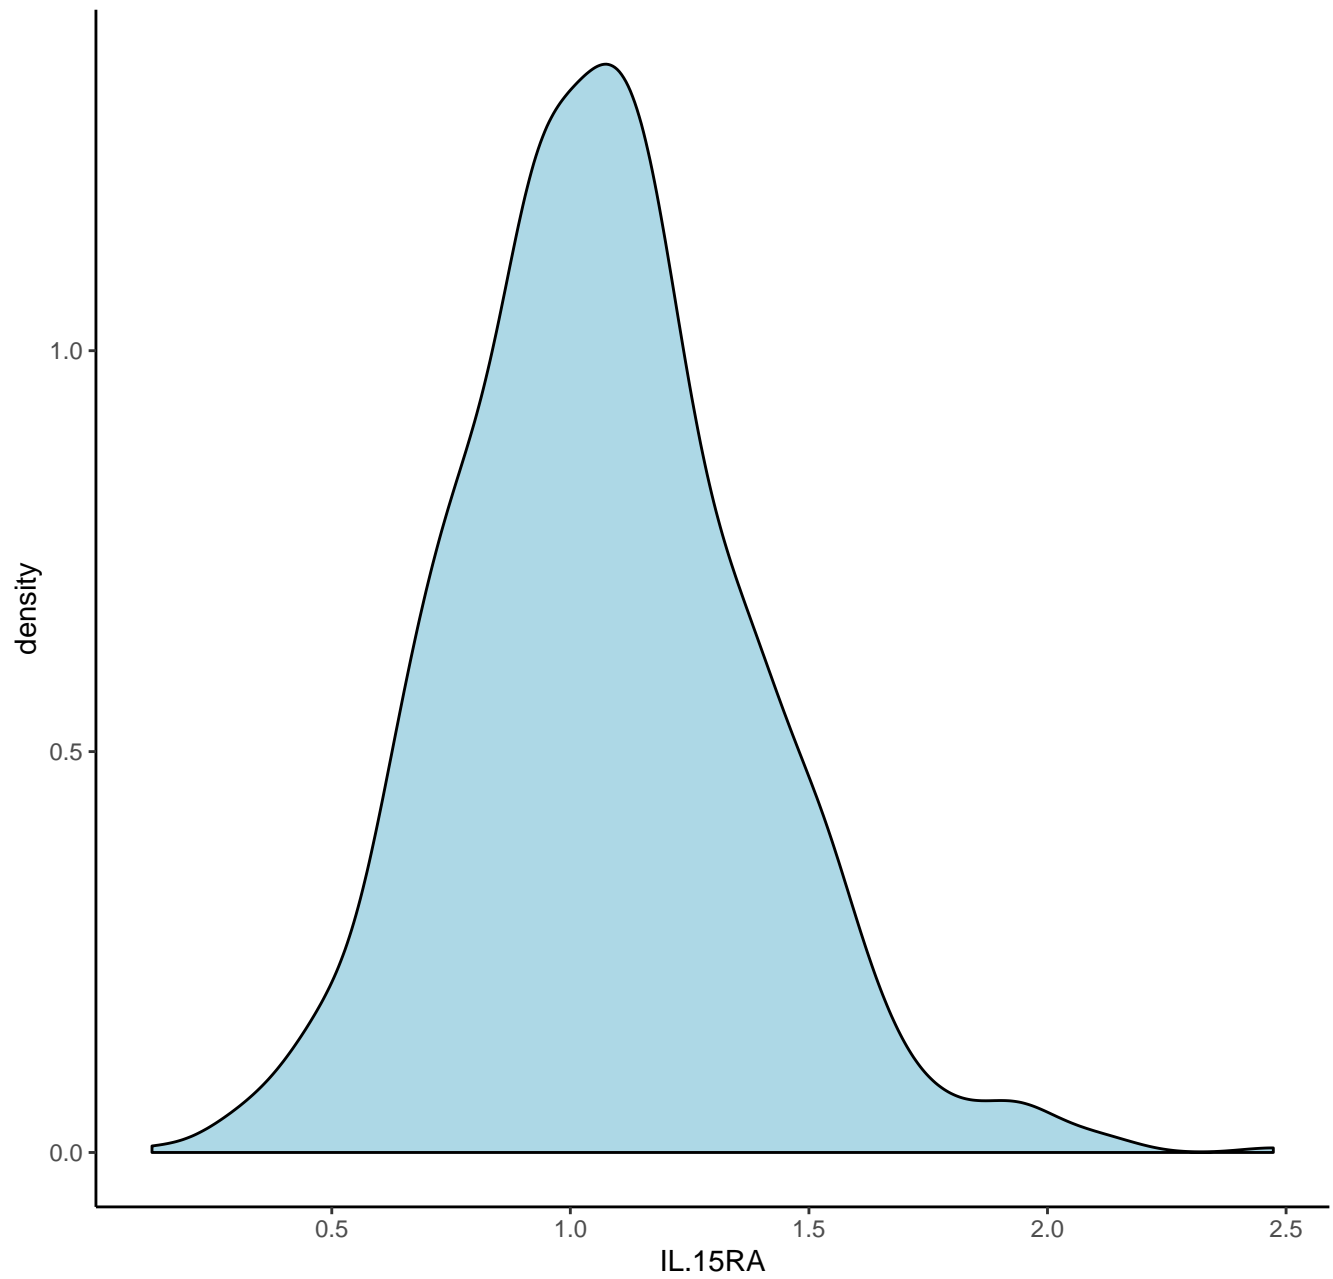

Pre-adjusted IL.18R1 Distribution

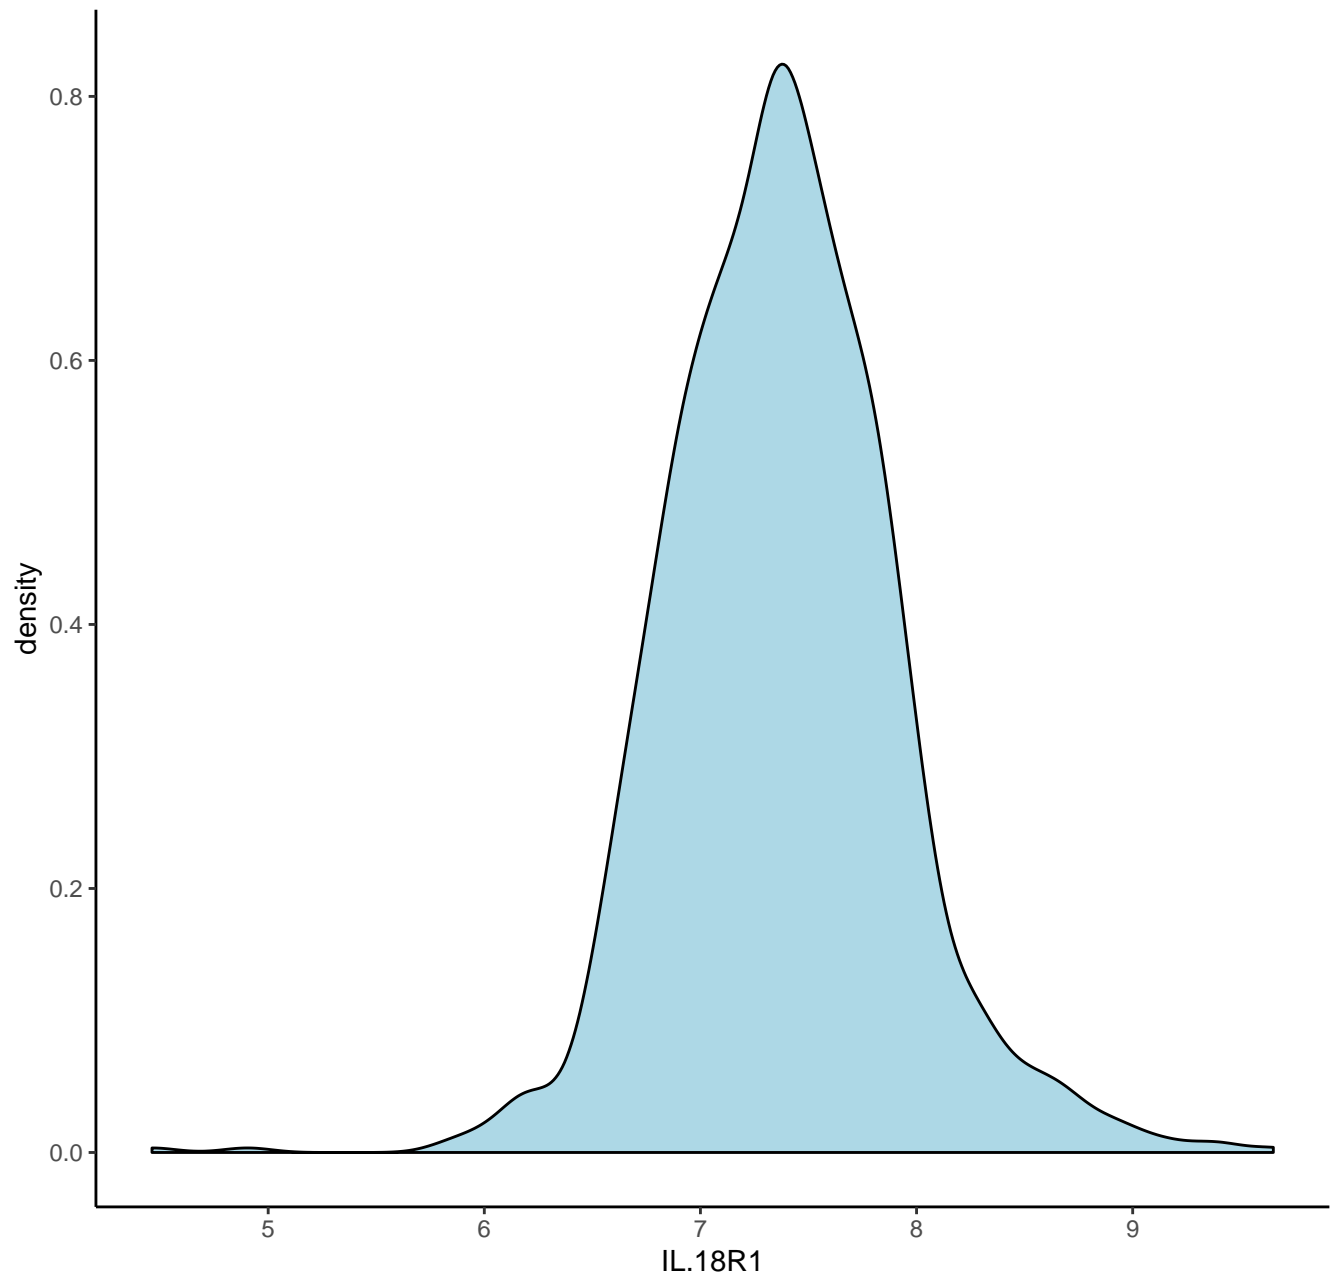

Pre-adjusted IL10 Distribution

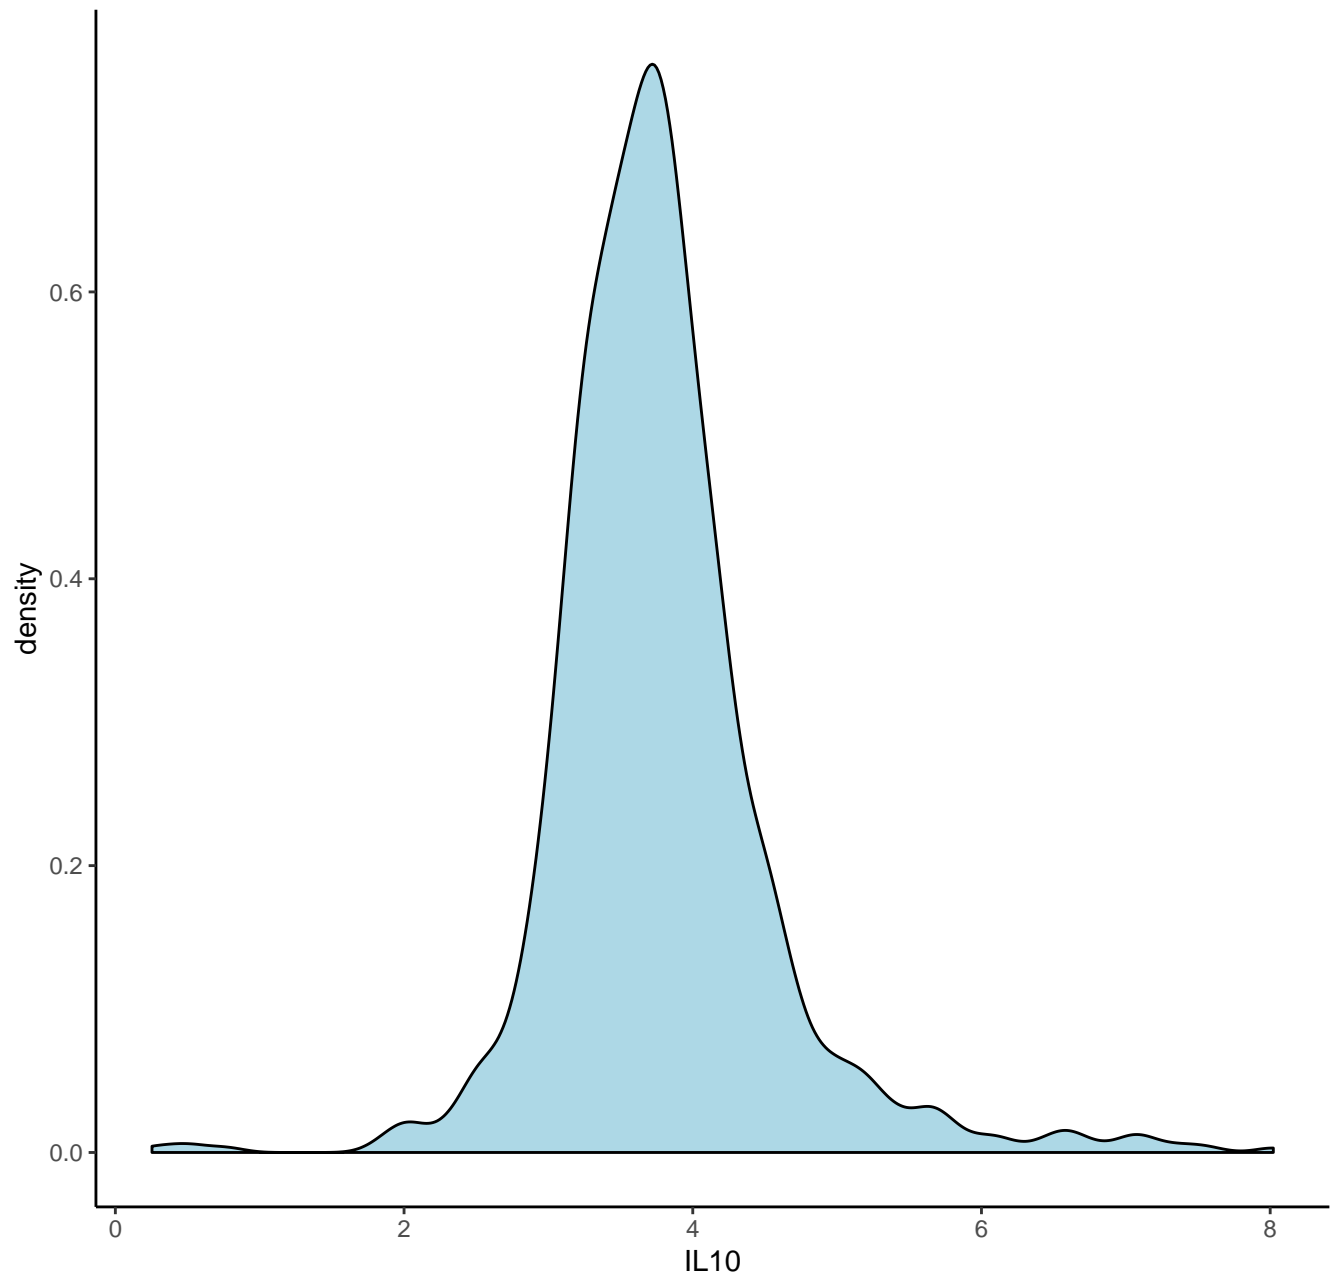

Pre-adjusted IL18 Distribution

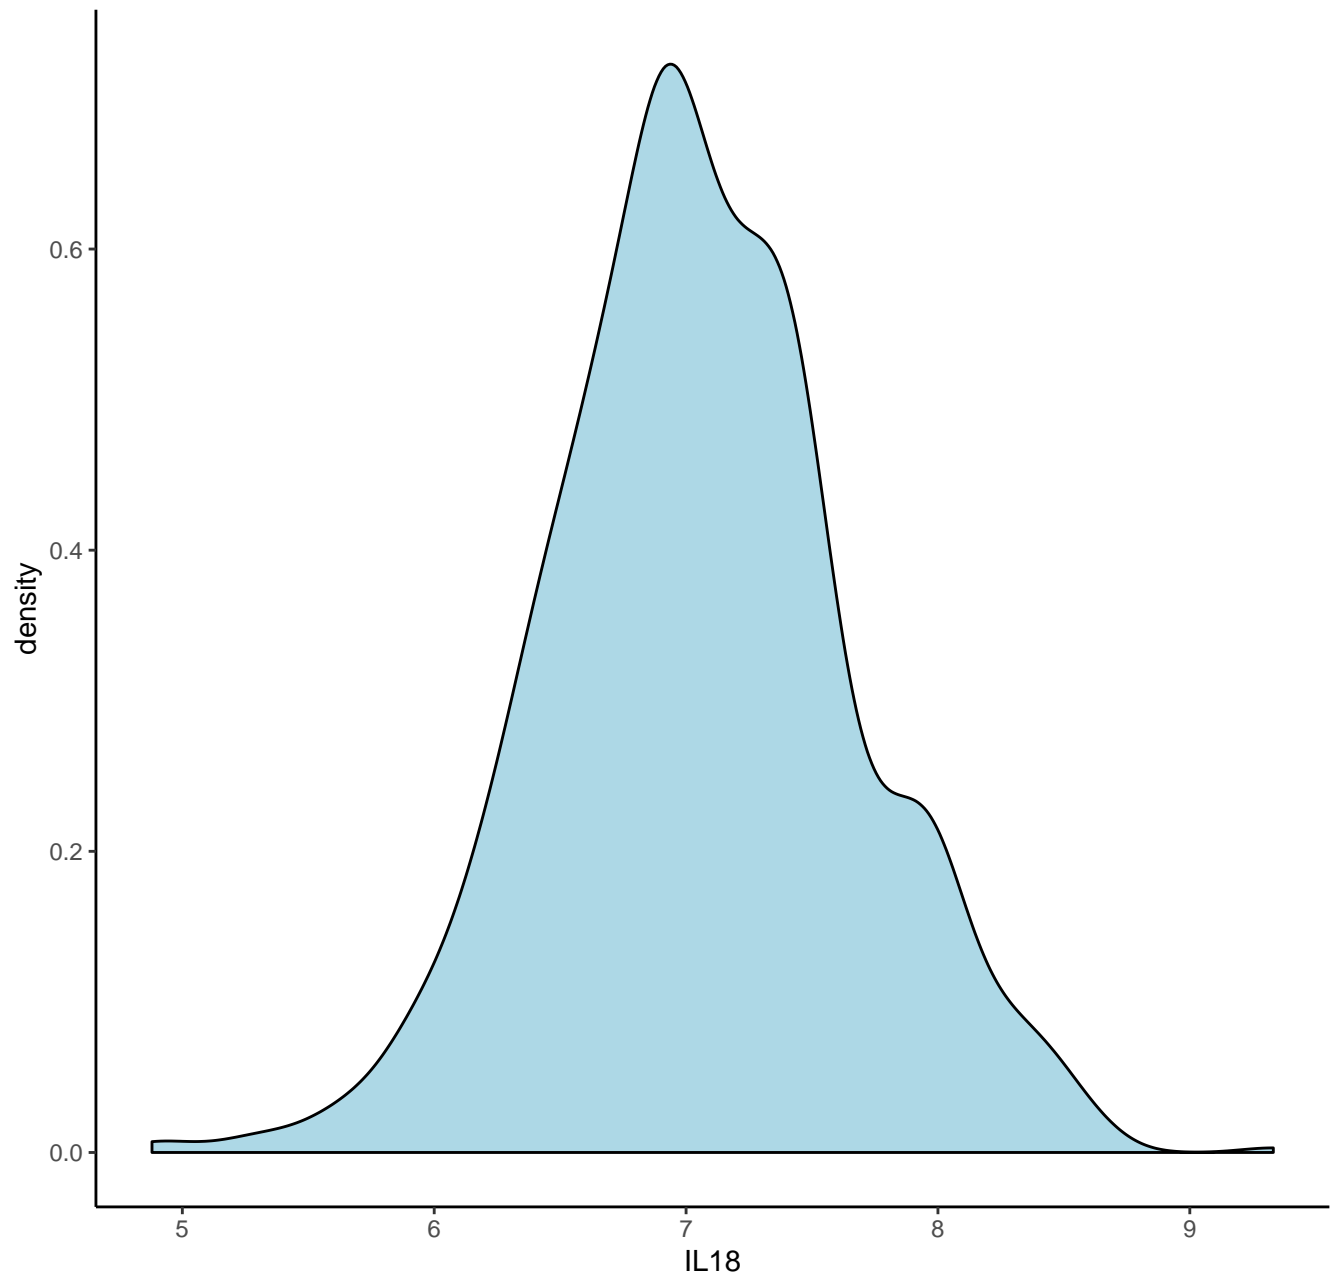



Pre-adjusted IL6 Distribution

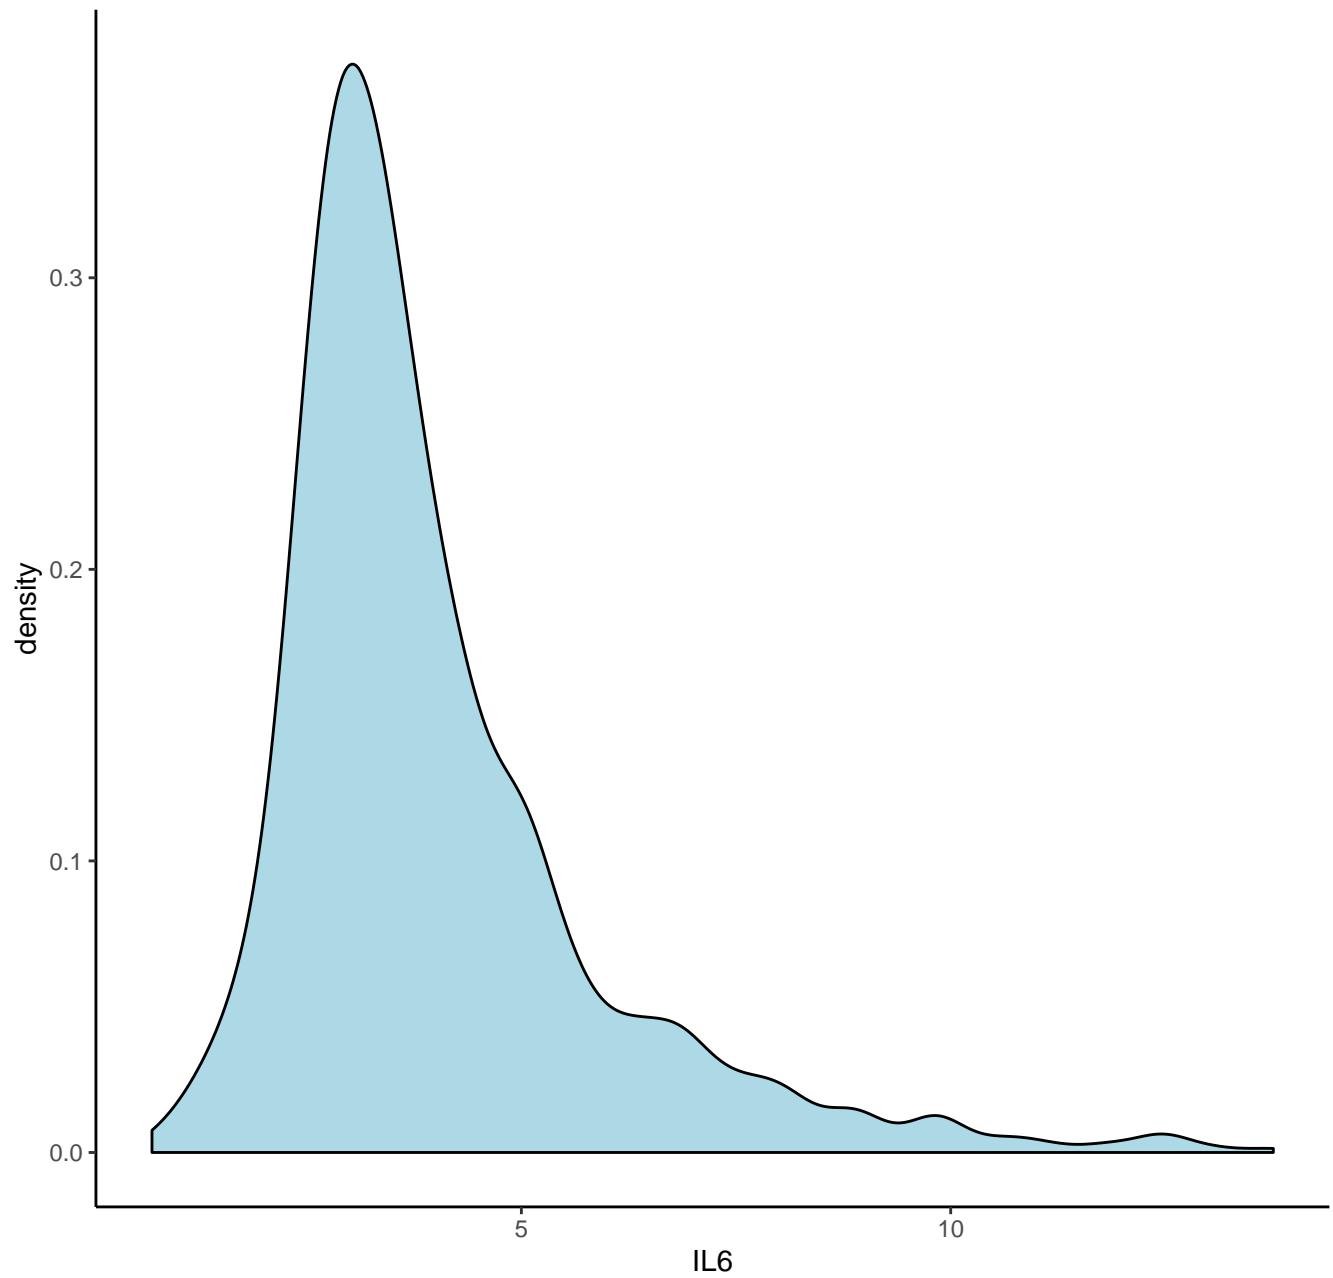

Pre-adjusted IL7 Distribution

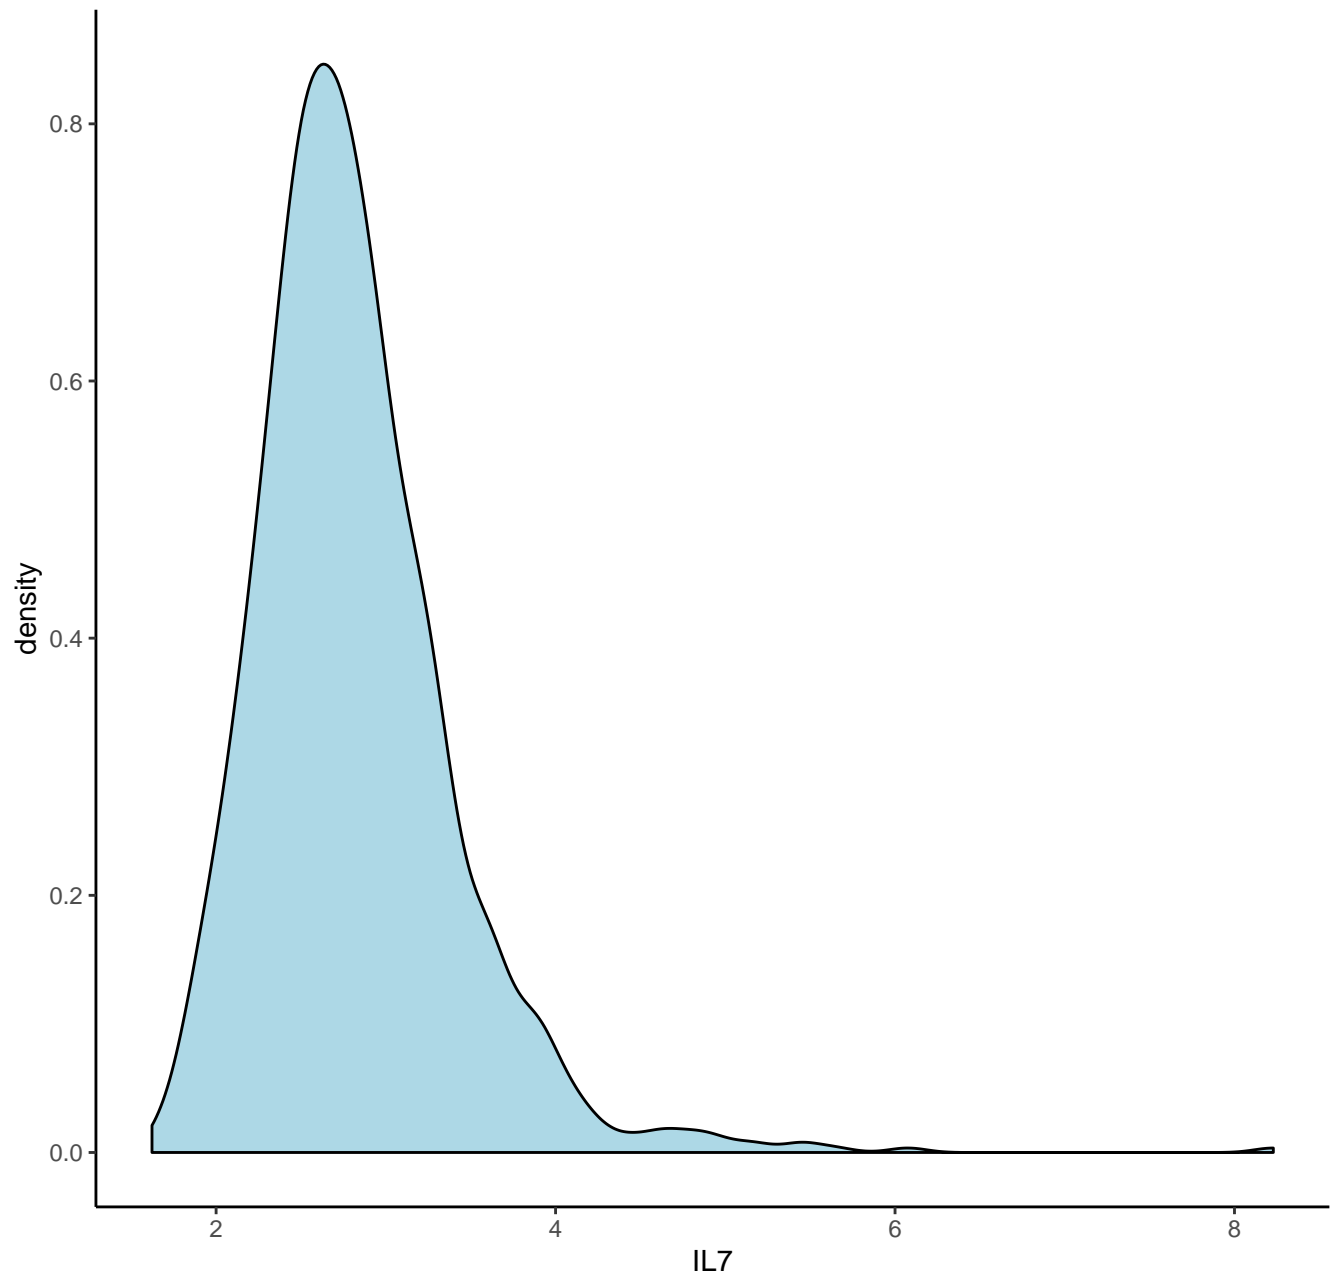

Pre-adjusted IL8 Distribution

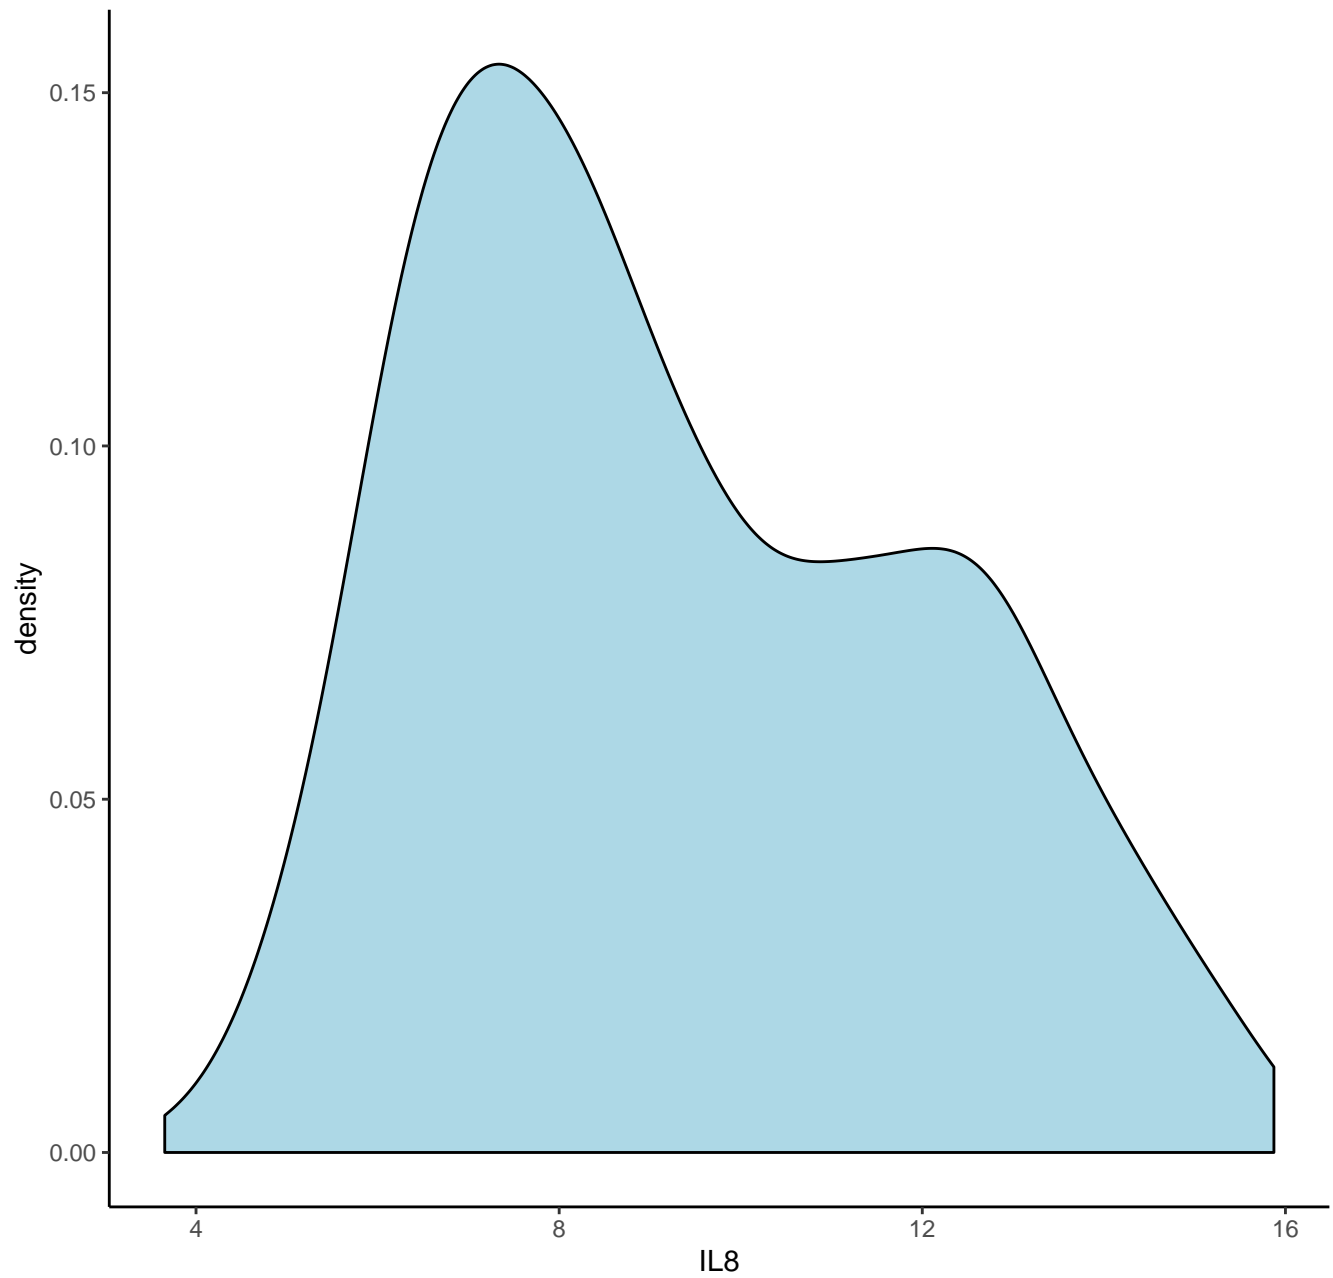

Pre-adjusted LAP.TGF.beta.1 Distribution

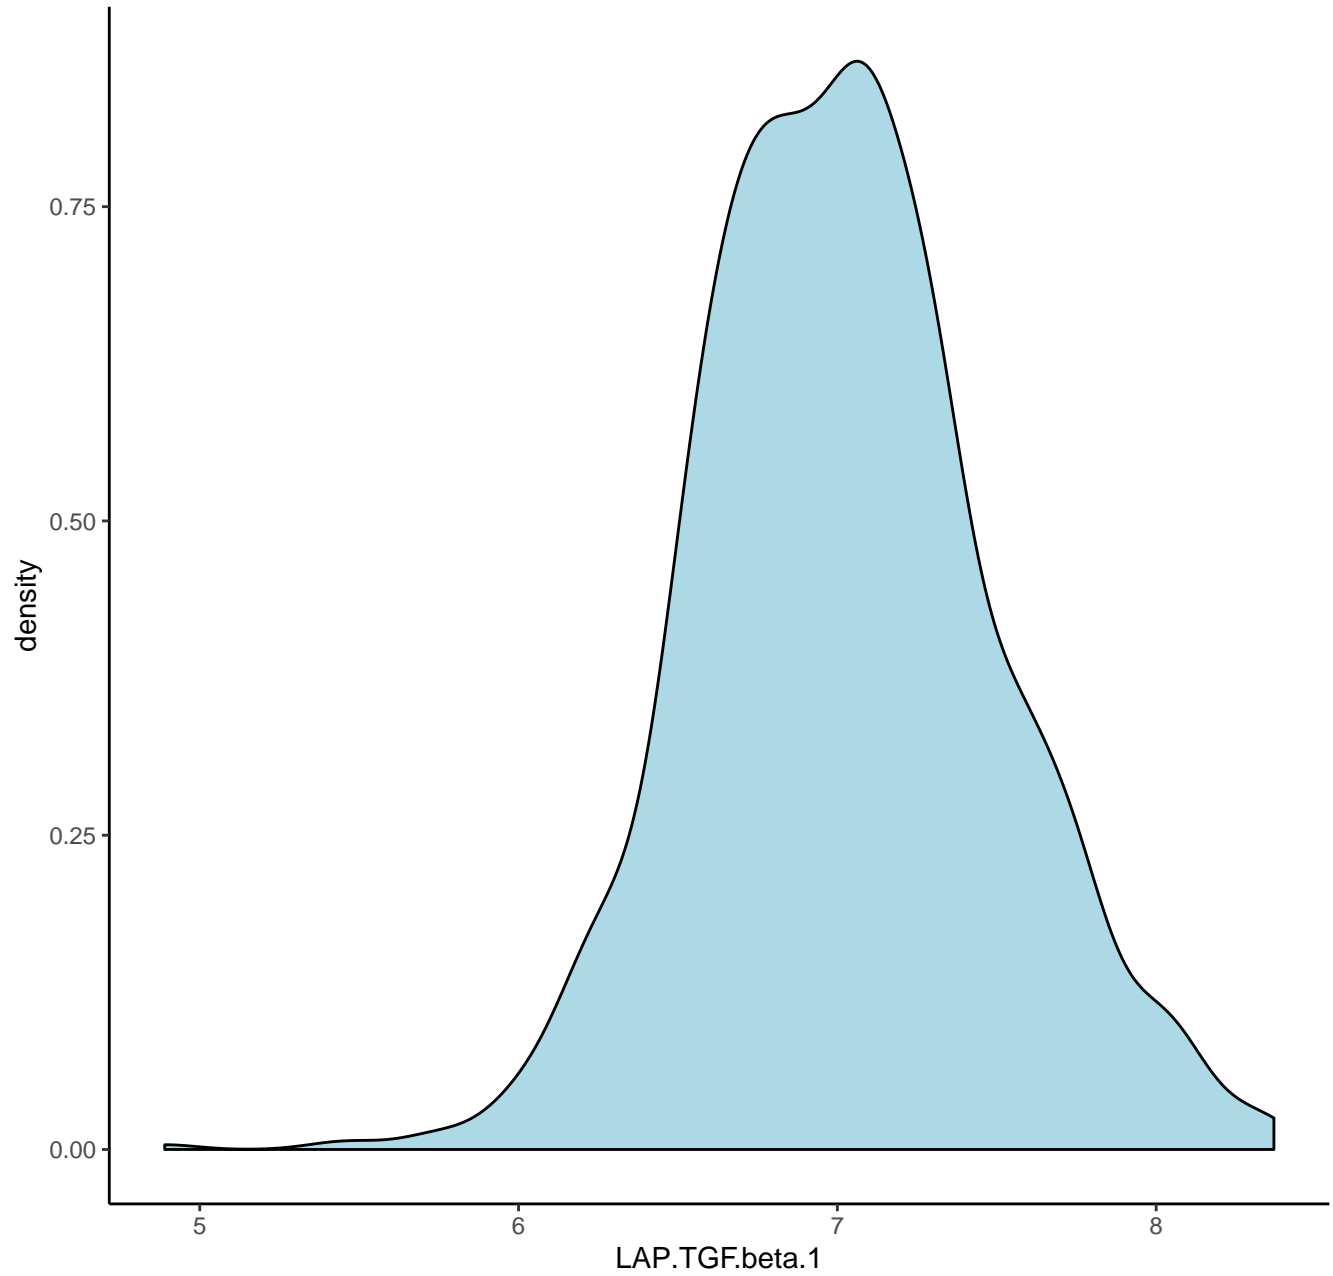

Pre-adjusted LIF.R Distribution

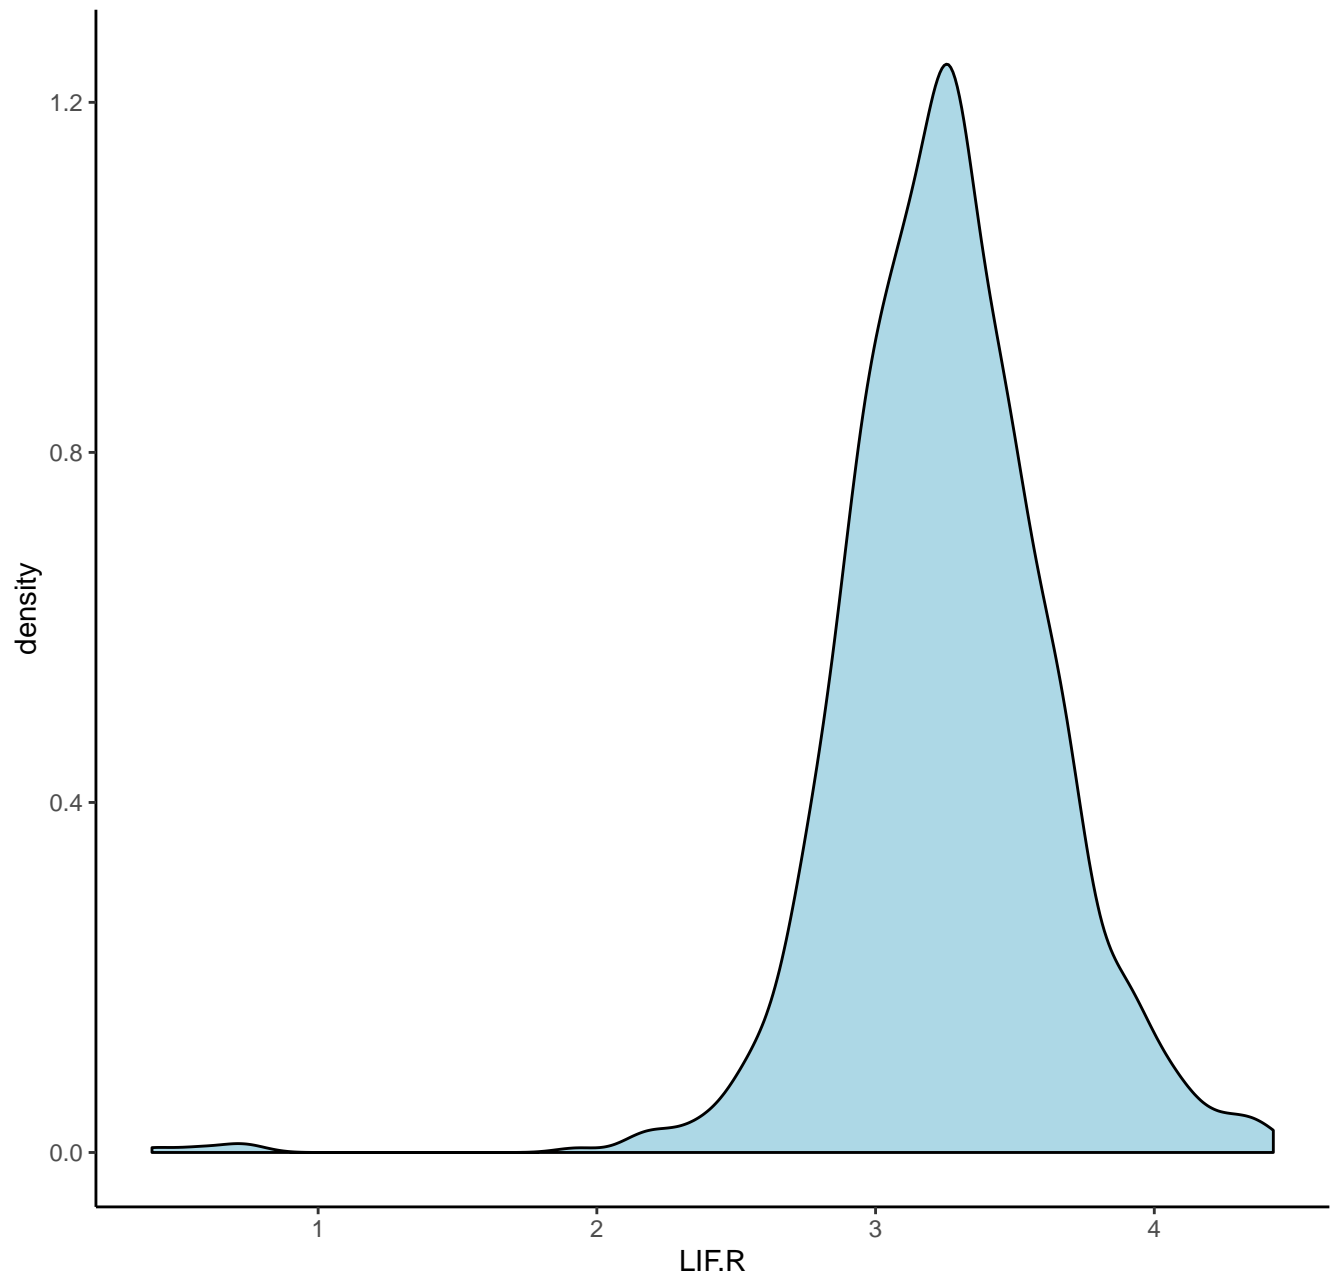

Pre-adjusted MCP.1 Distribution

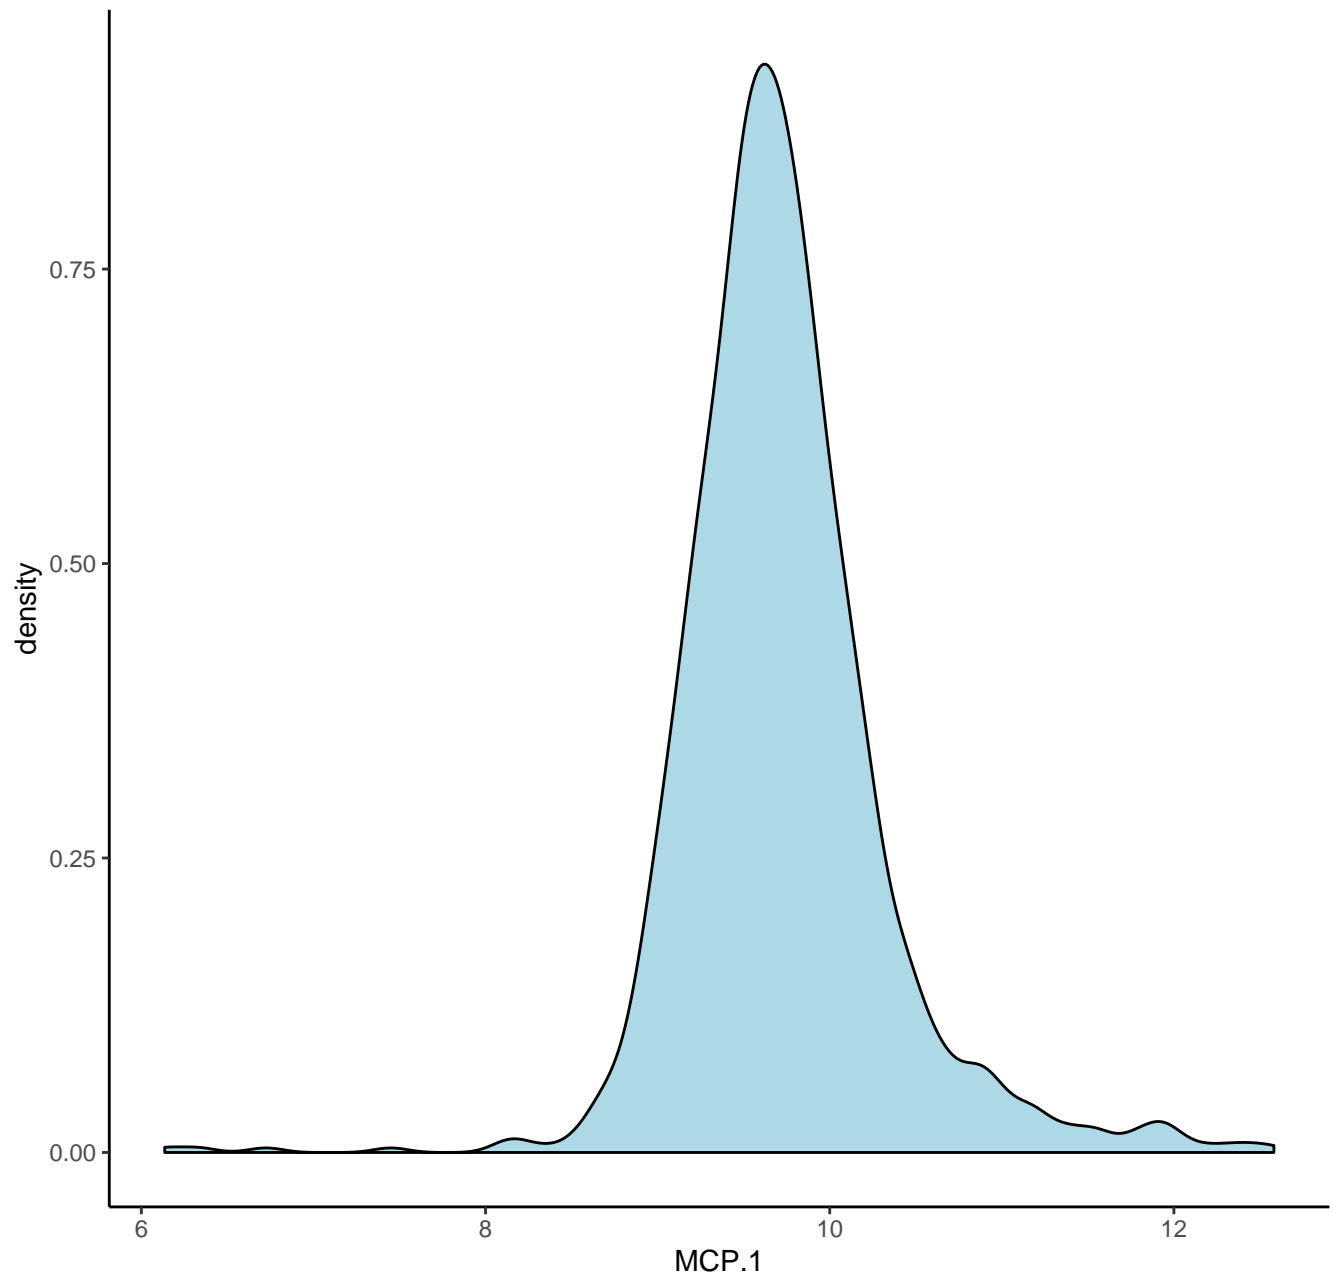

Pre-adjusted MCP.2 Distribution

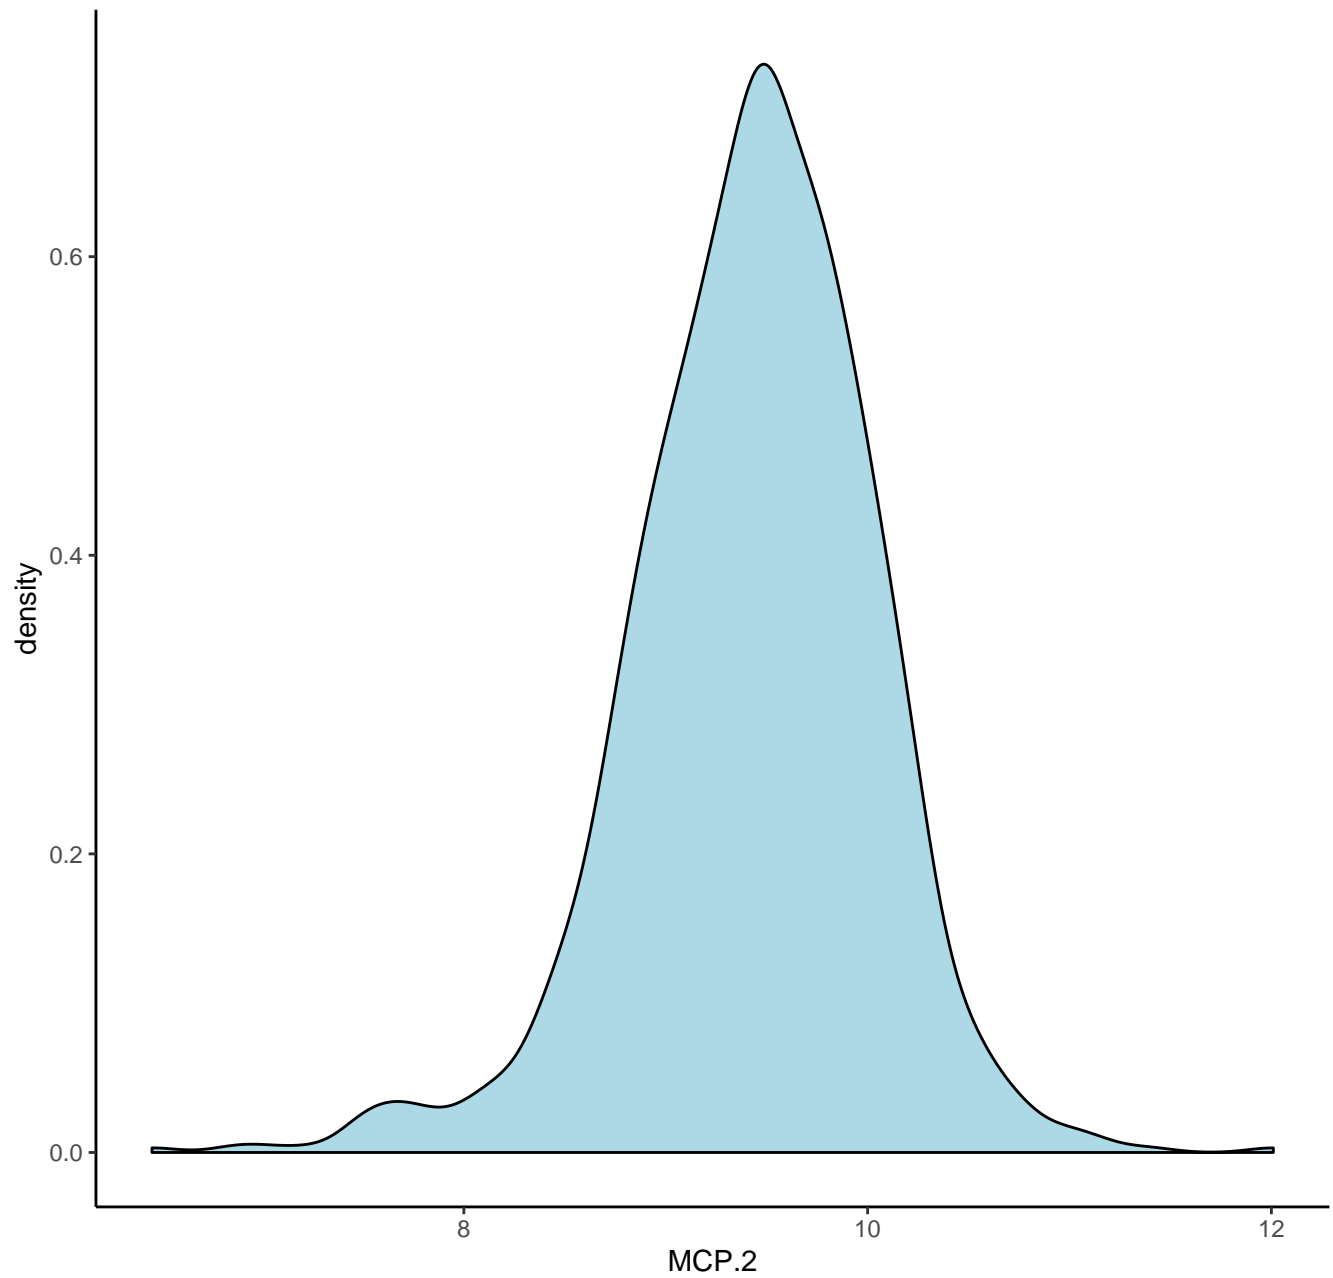

Pre-adjusted MCP.3 Distribution

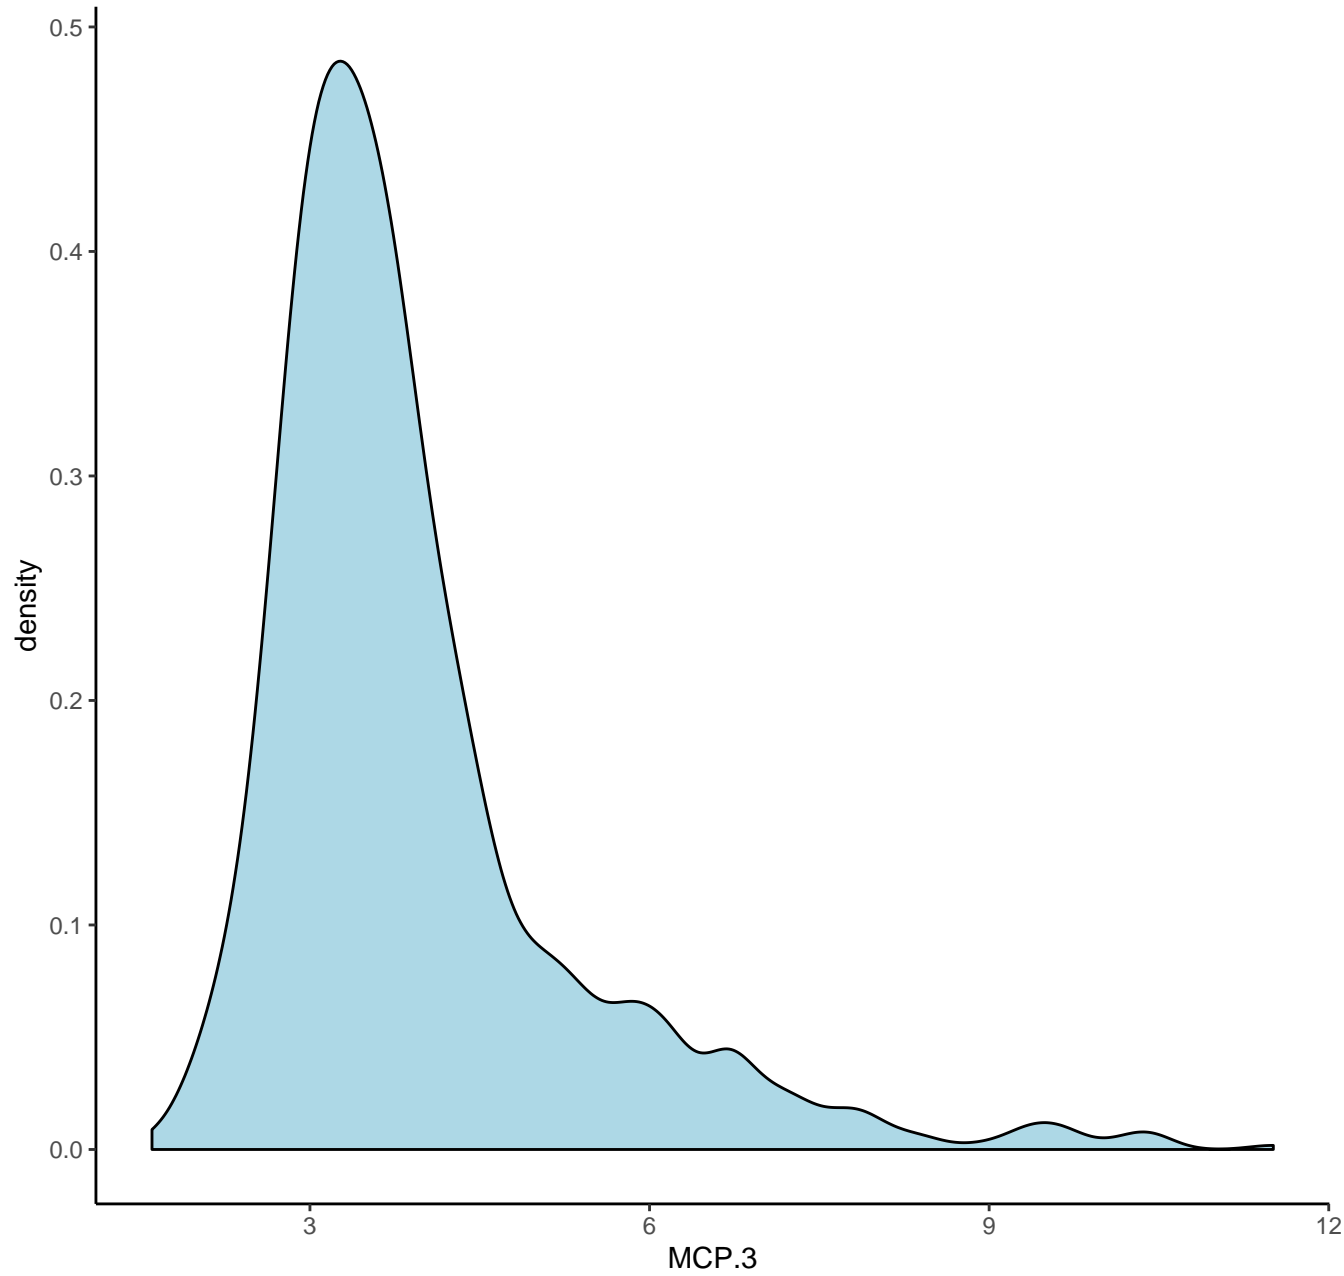



Pre-adjusted MCP.4 Distribution

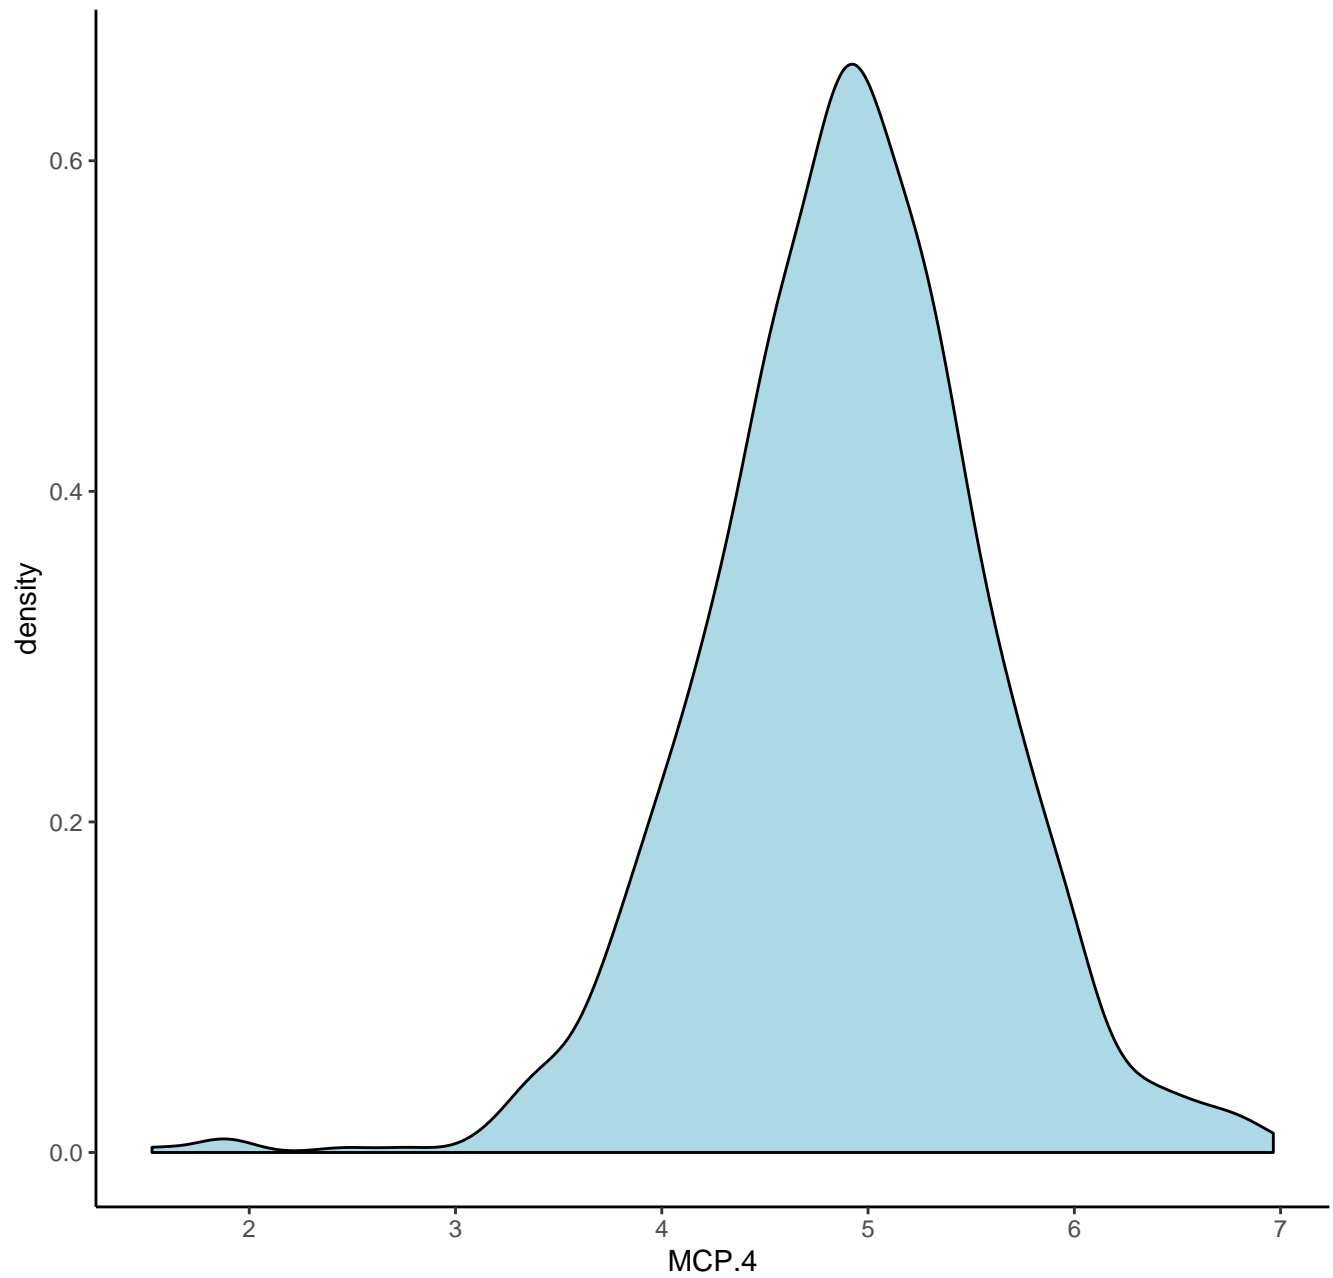

Pre-adjusted MMP.1 Distribution

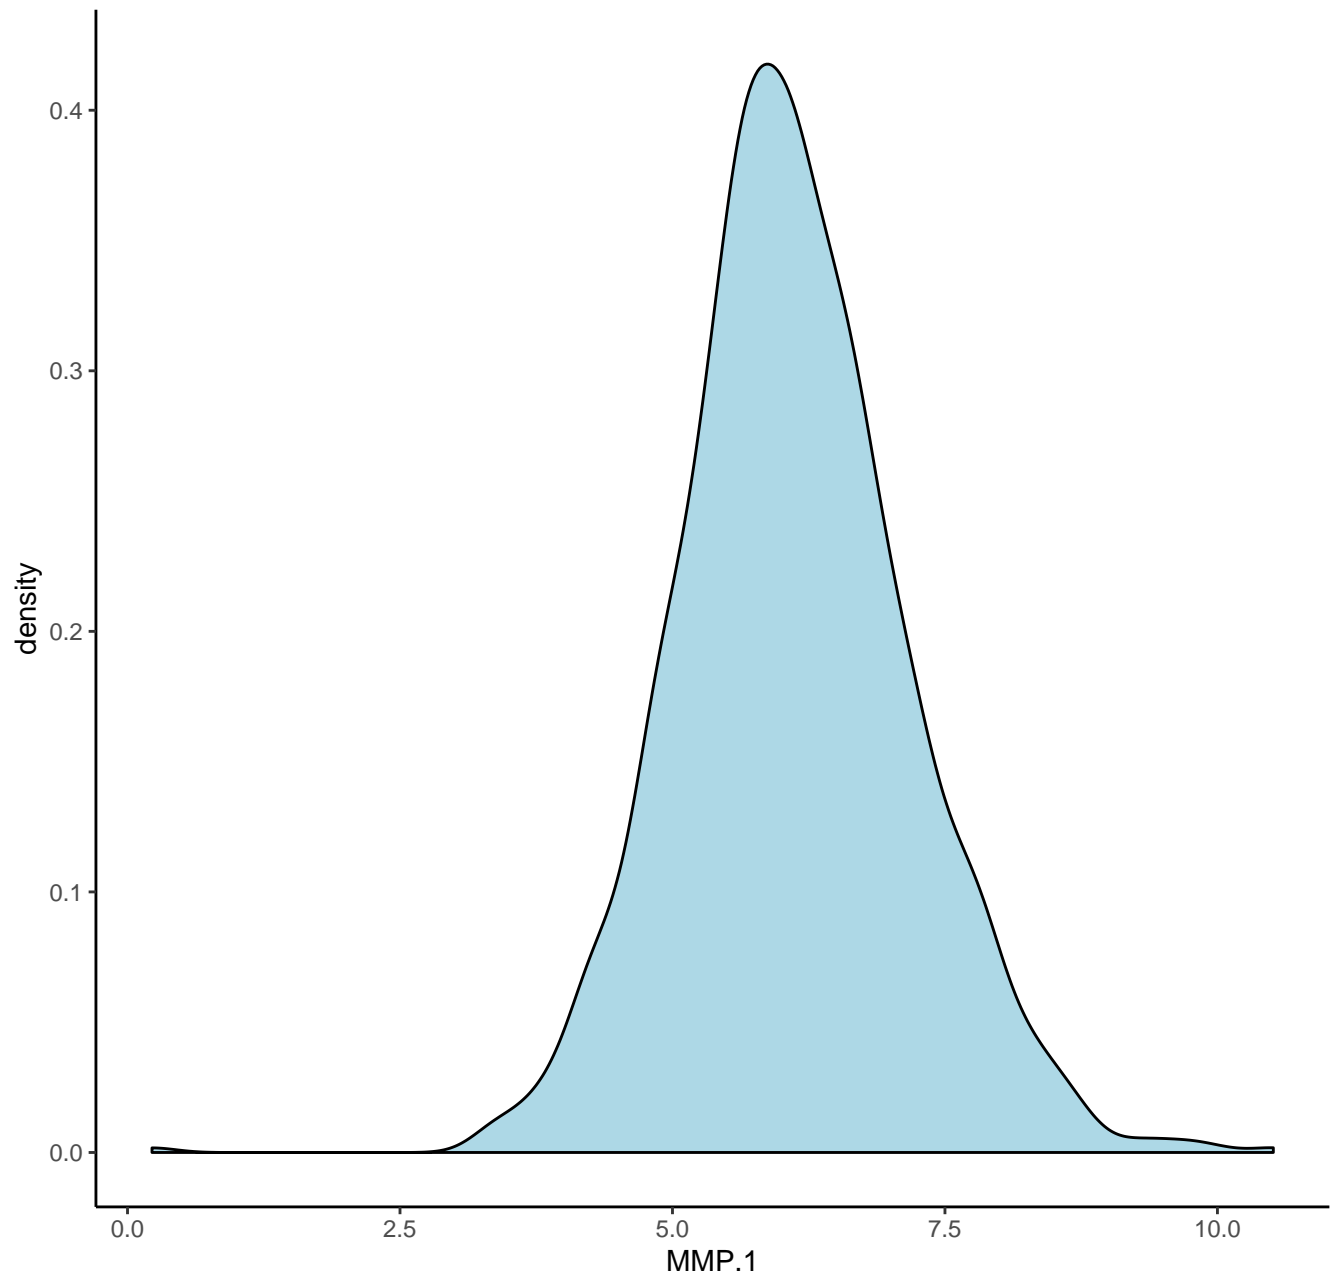

Pre-adjusted MMP.10 Distribution

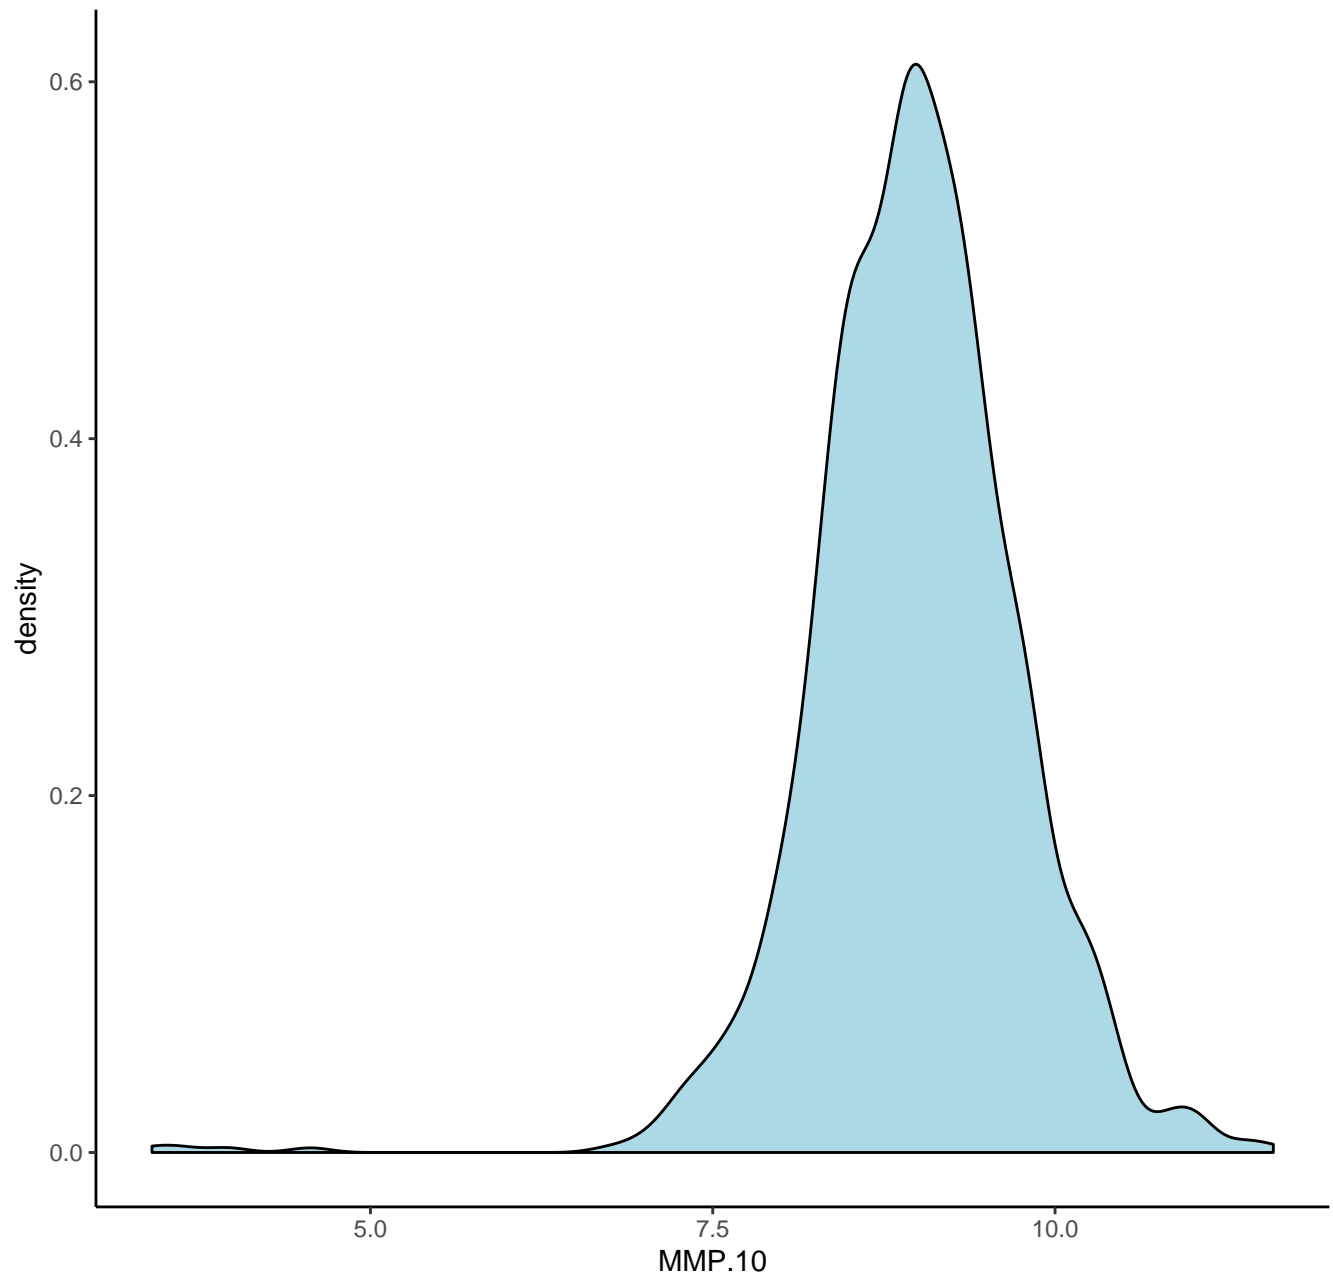

Pre-adjusted NT.3 Distribution

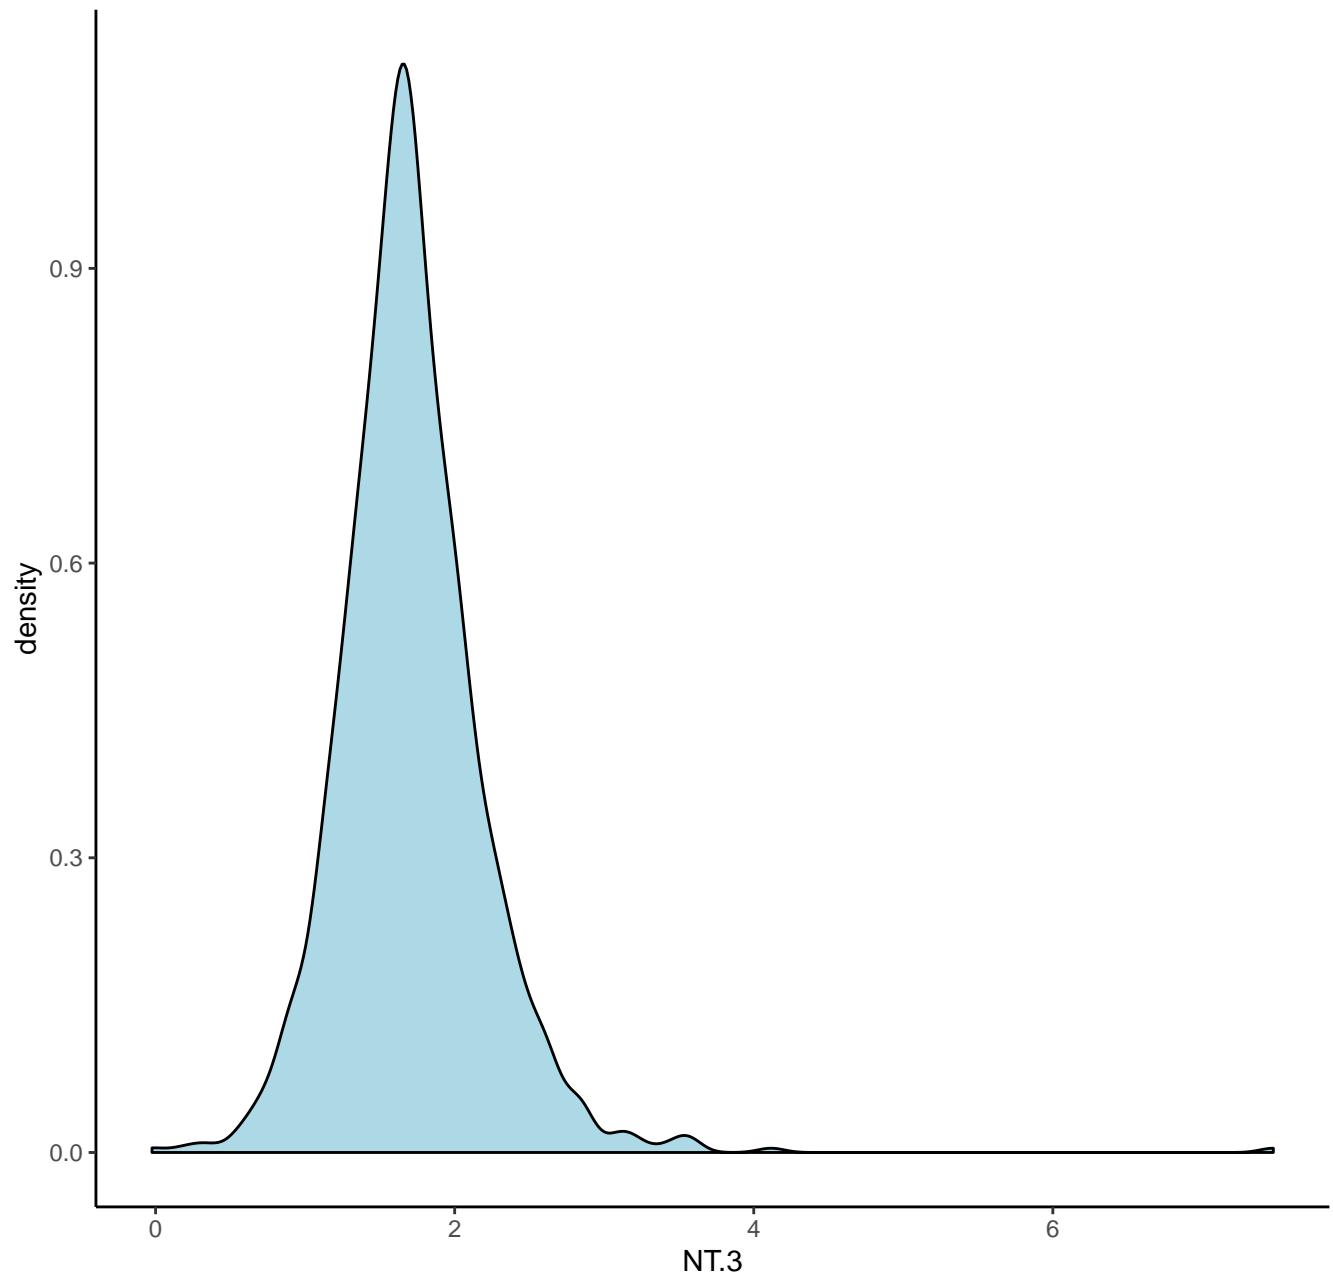

Pre-adjusted OPG Distribution

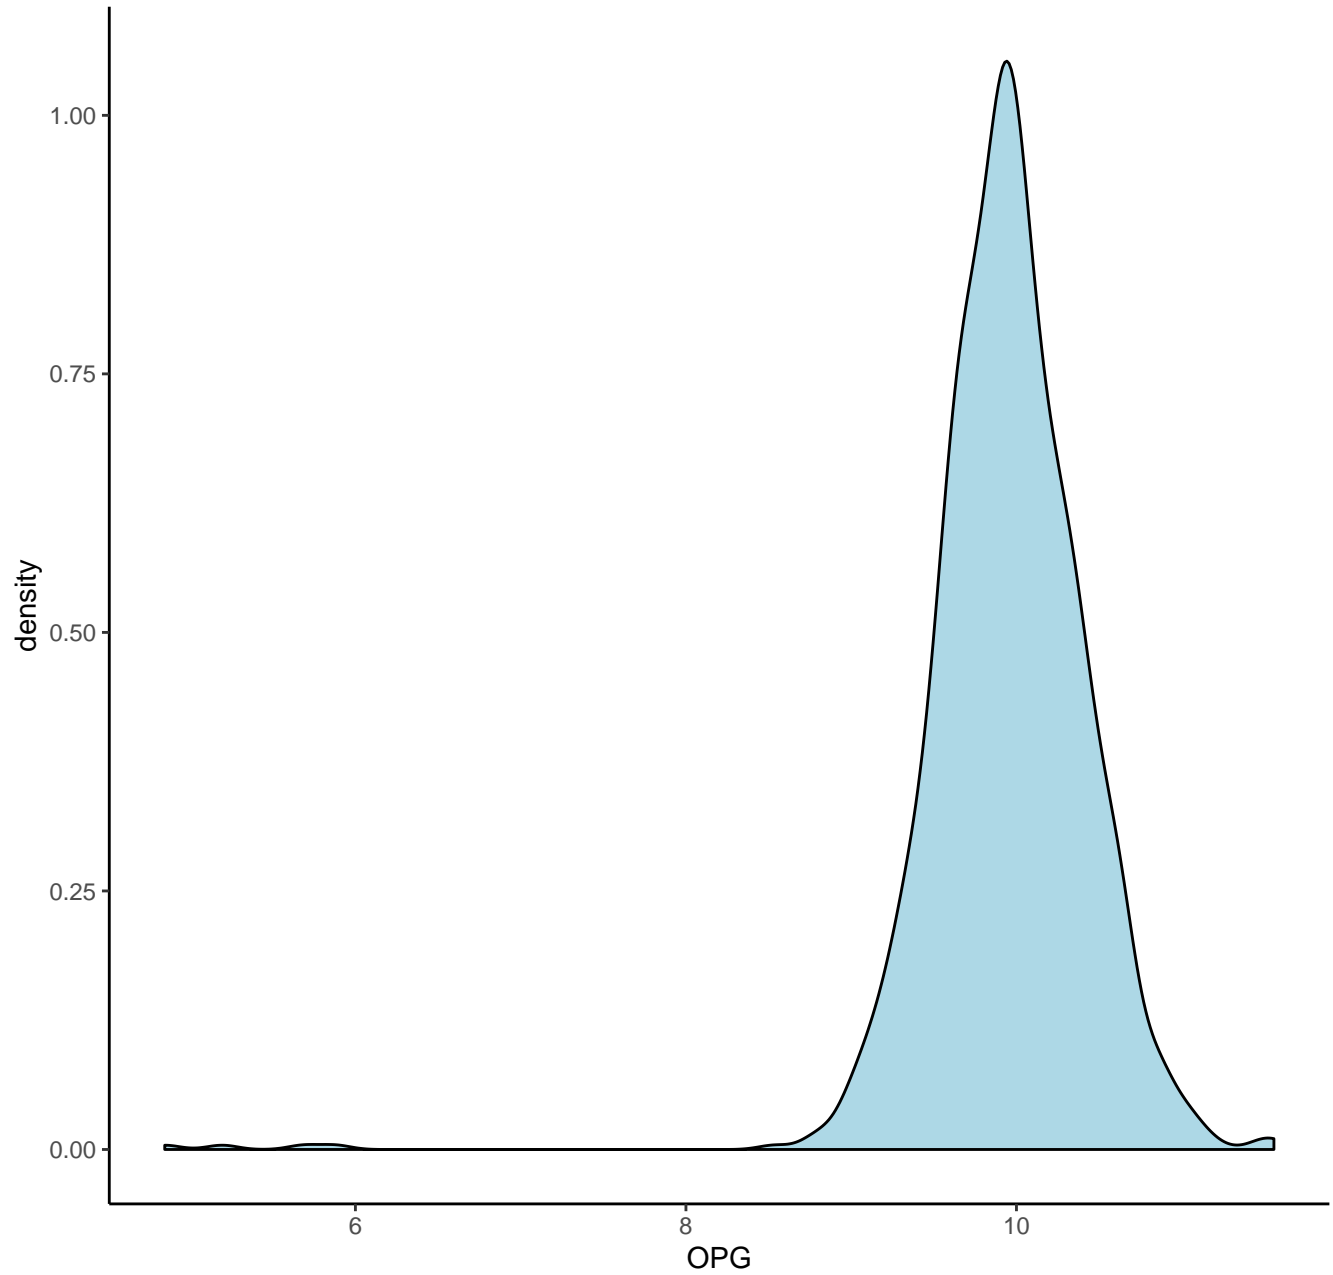

Pre-adjusted OSM Distribution

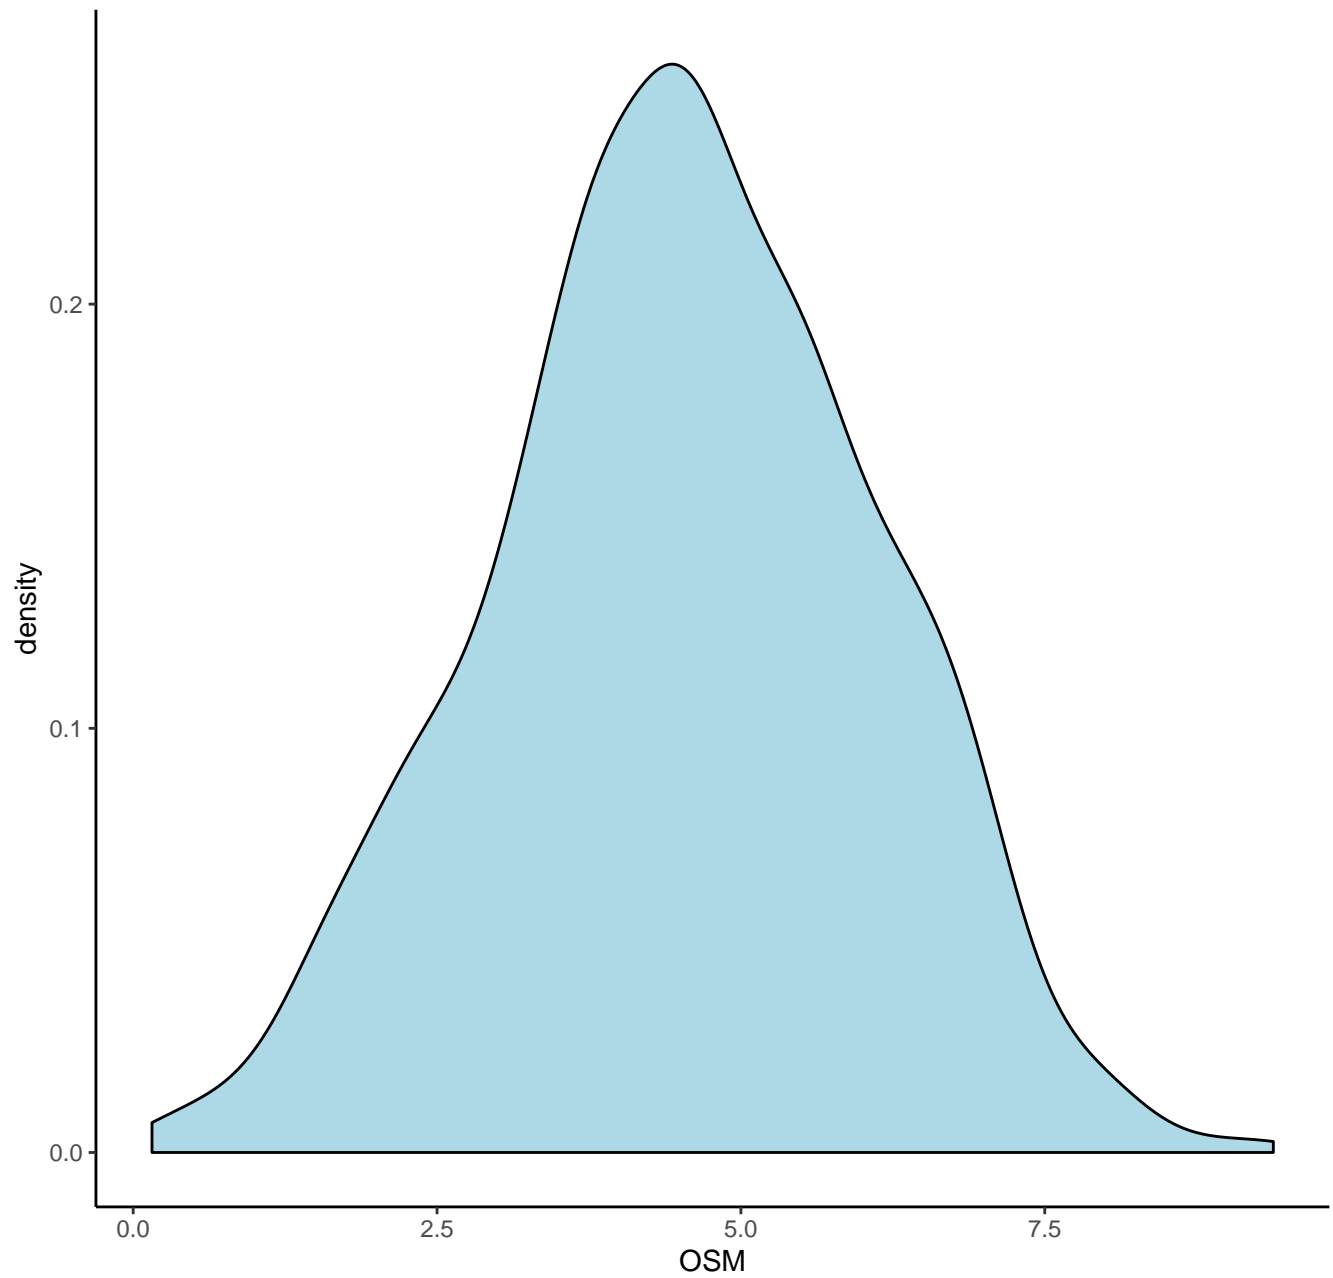

Pre-adjusted PD.L1 Distribution

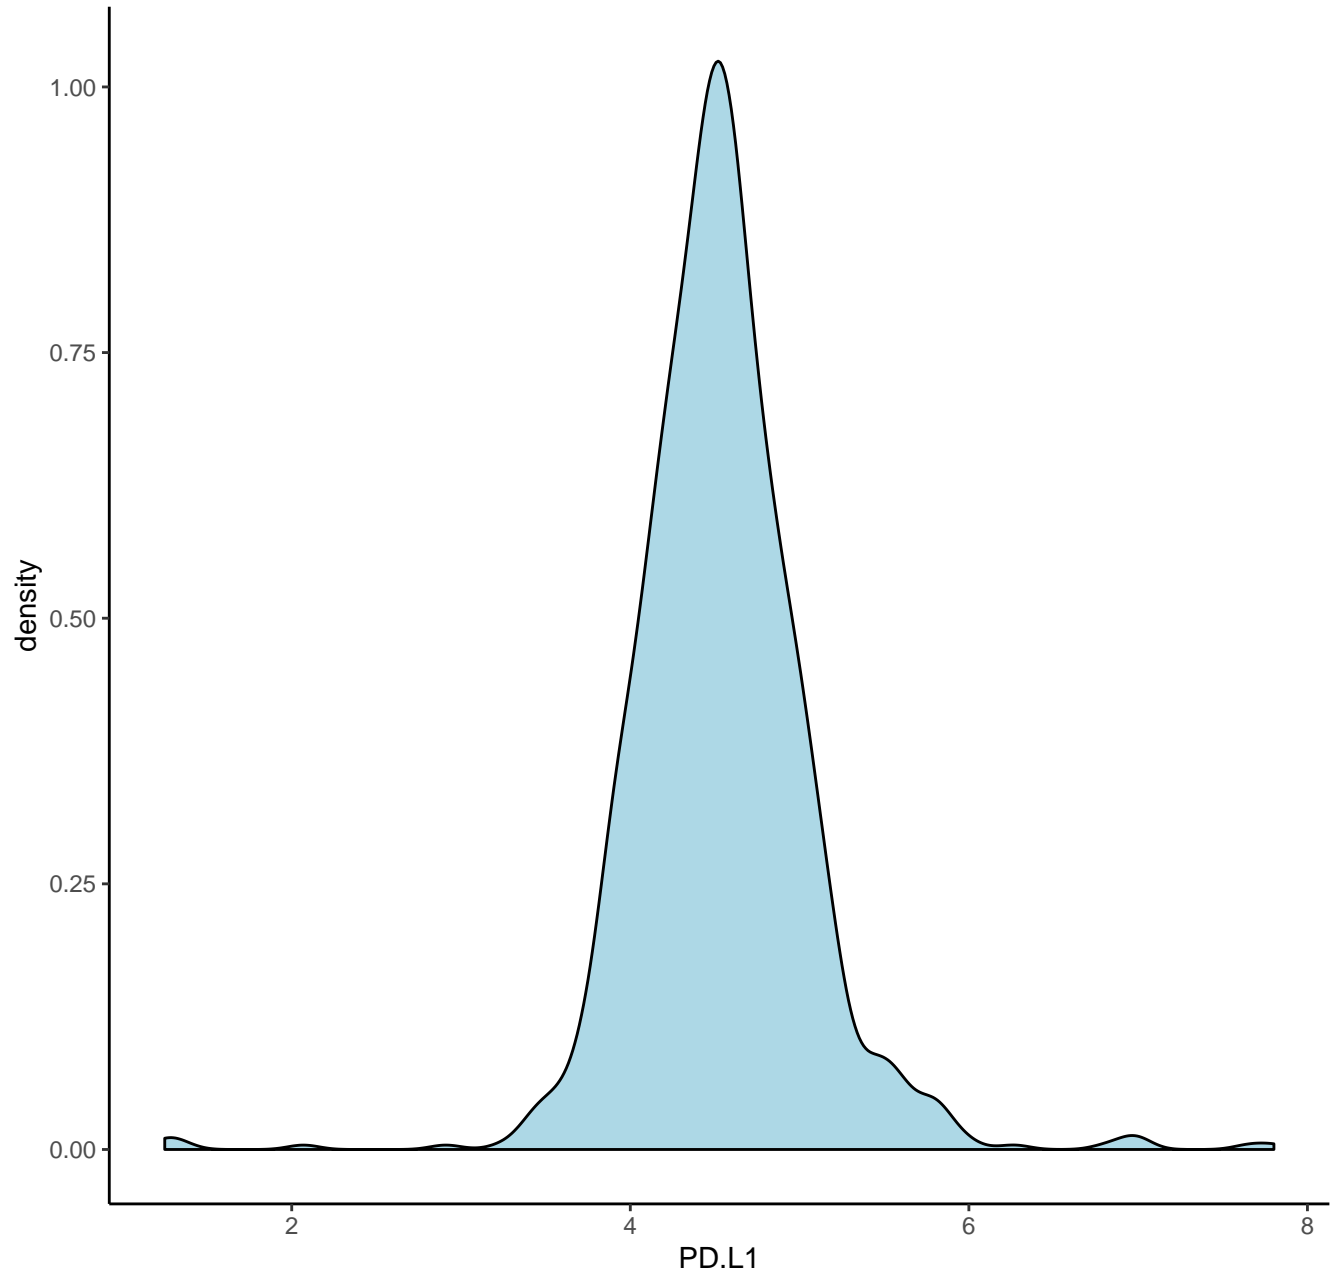

Pre-adjusted SCF Distribution

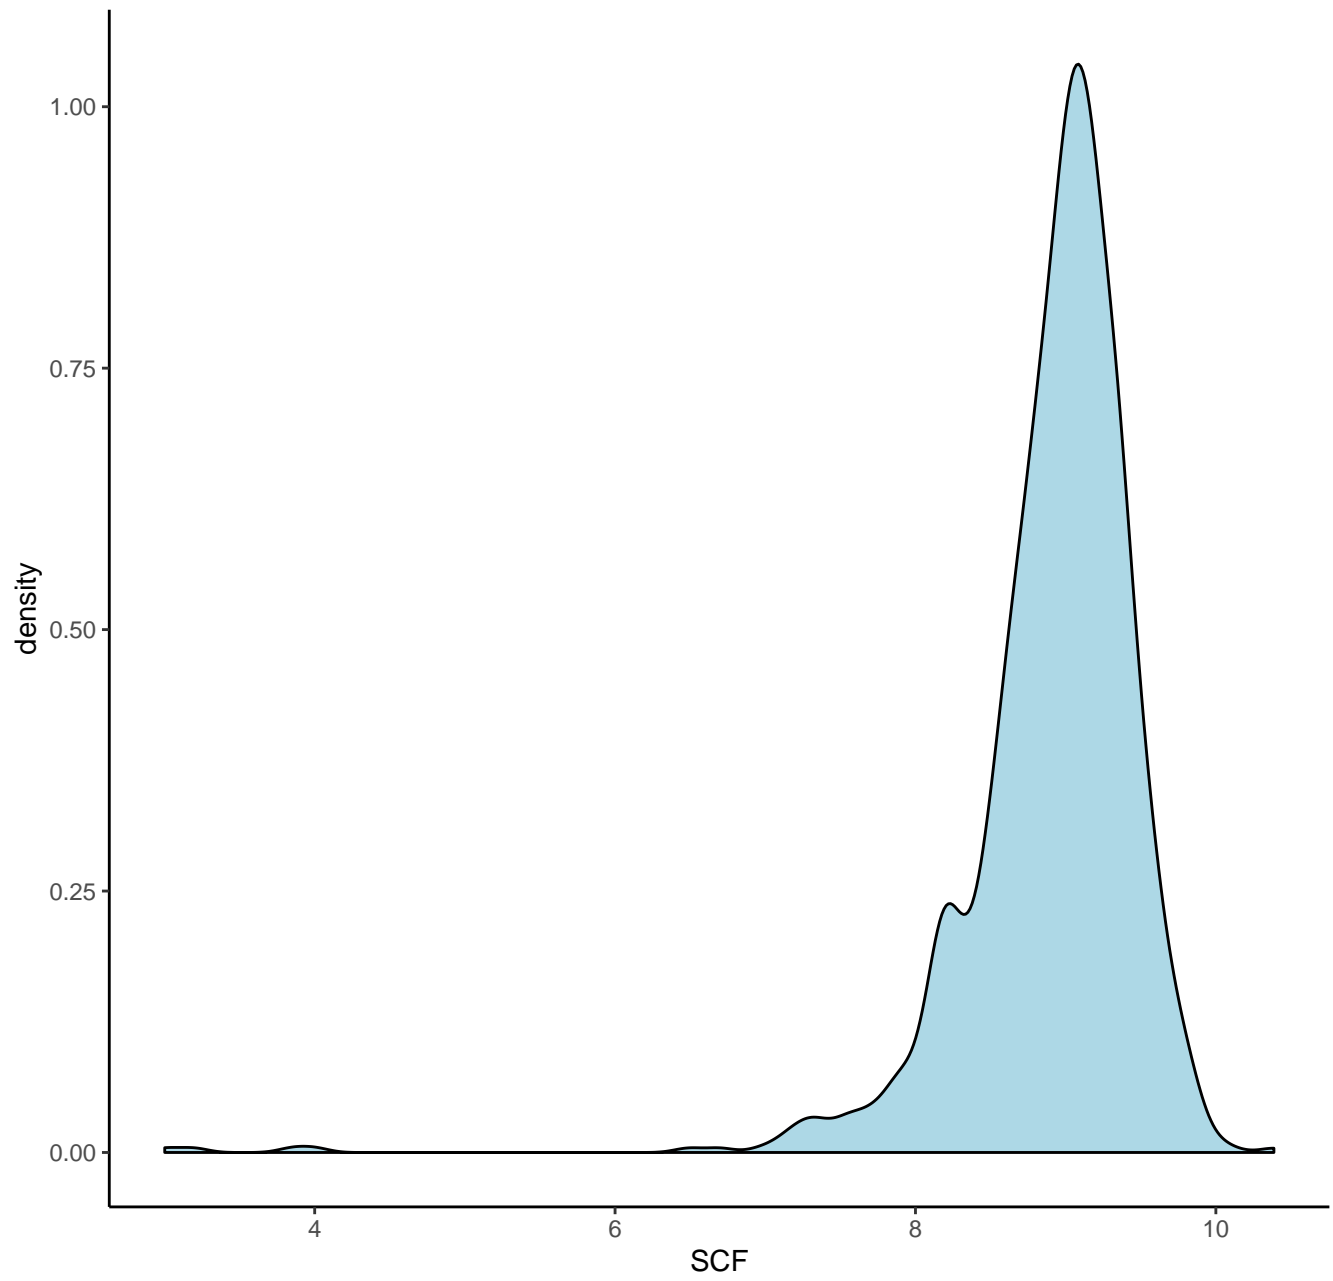



Pre-adjusted SIRT2 Distribution

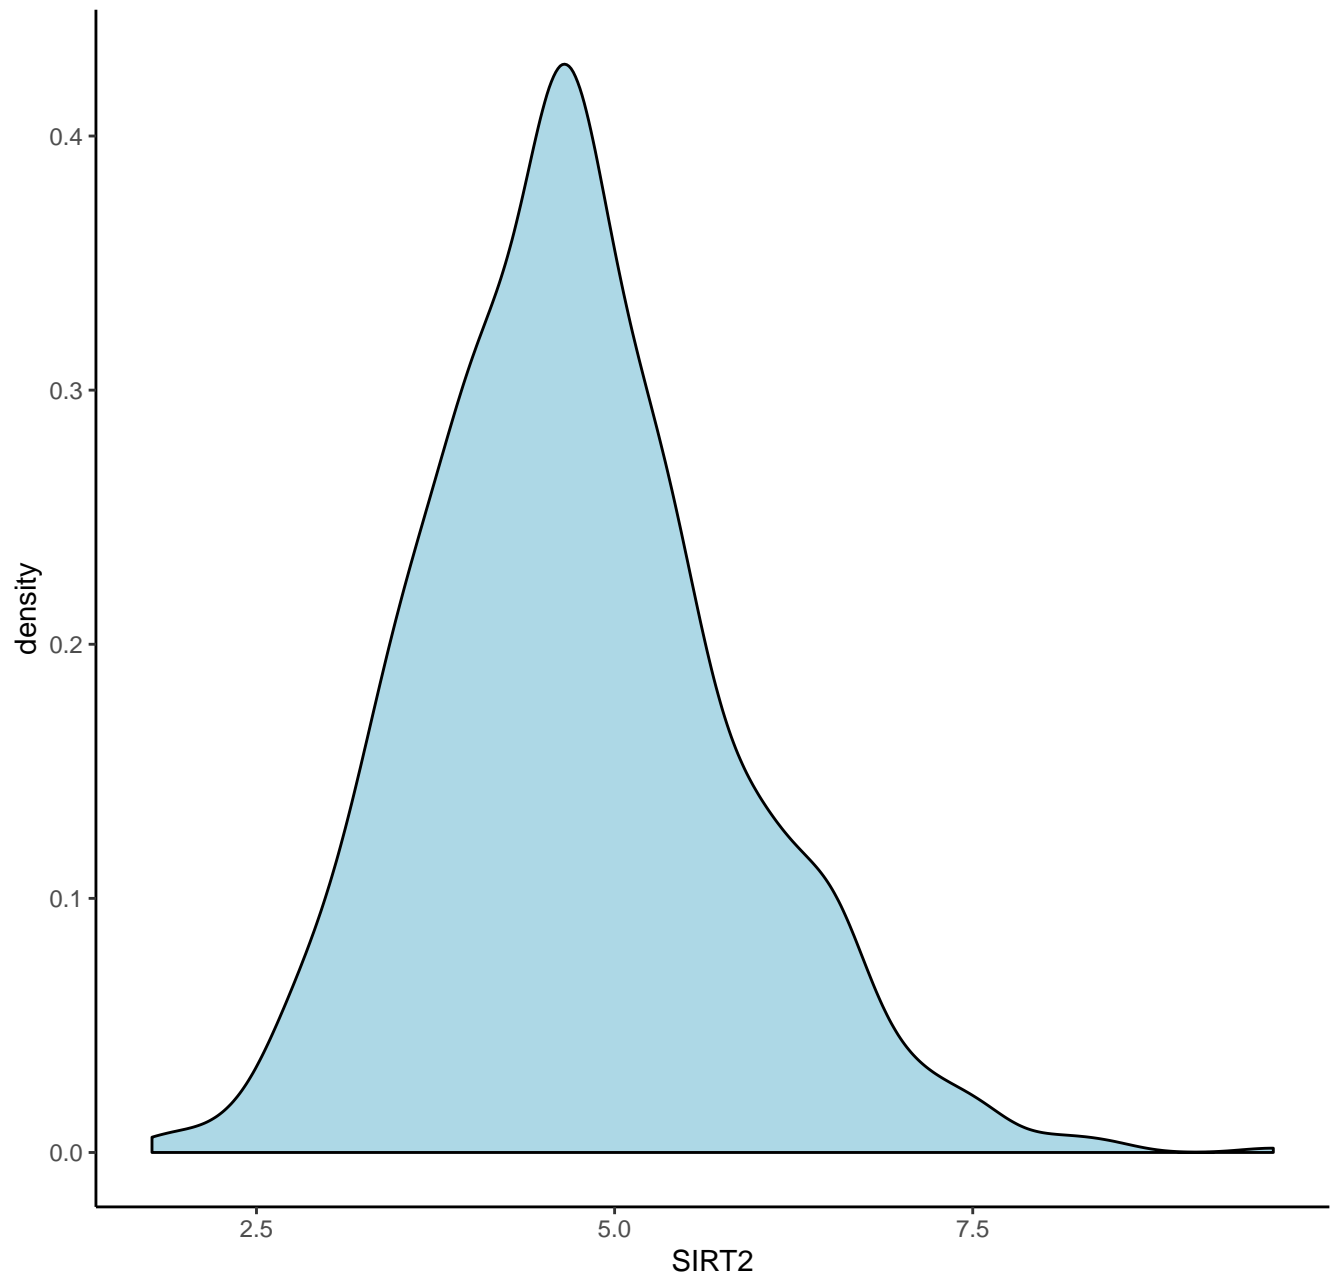

Pre-adjusted SLAMF1 Distribution

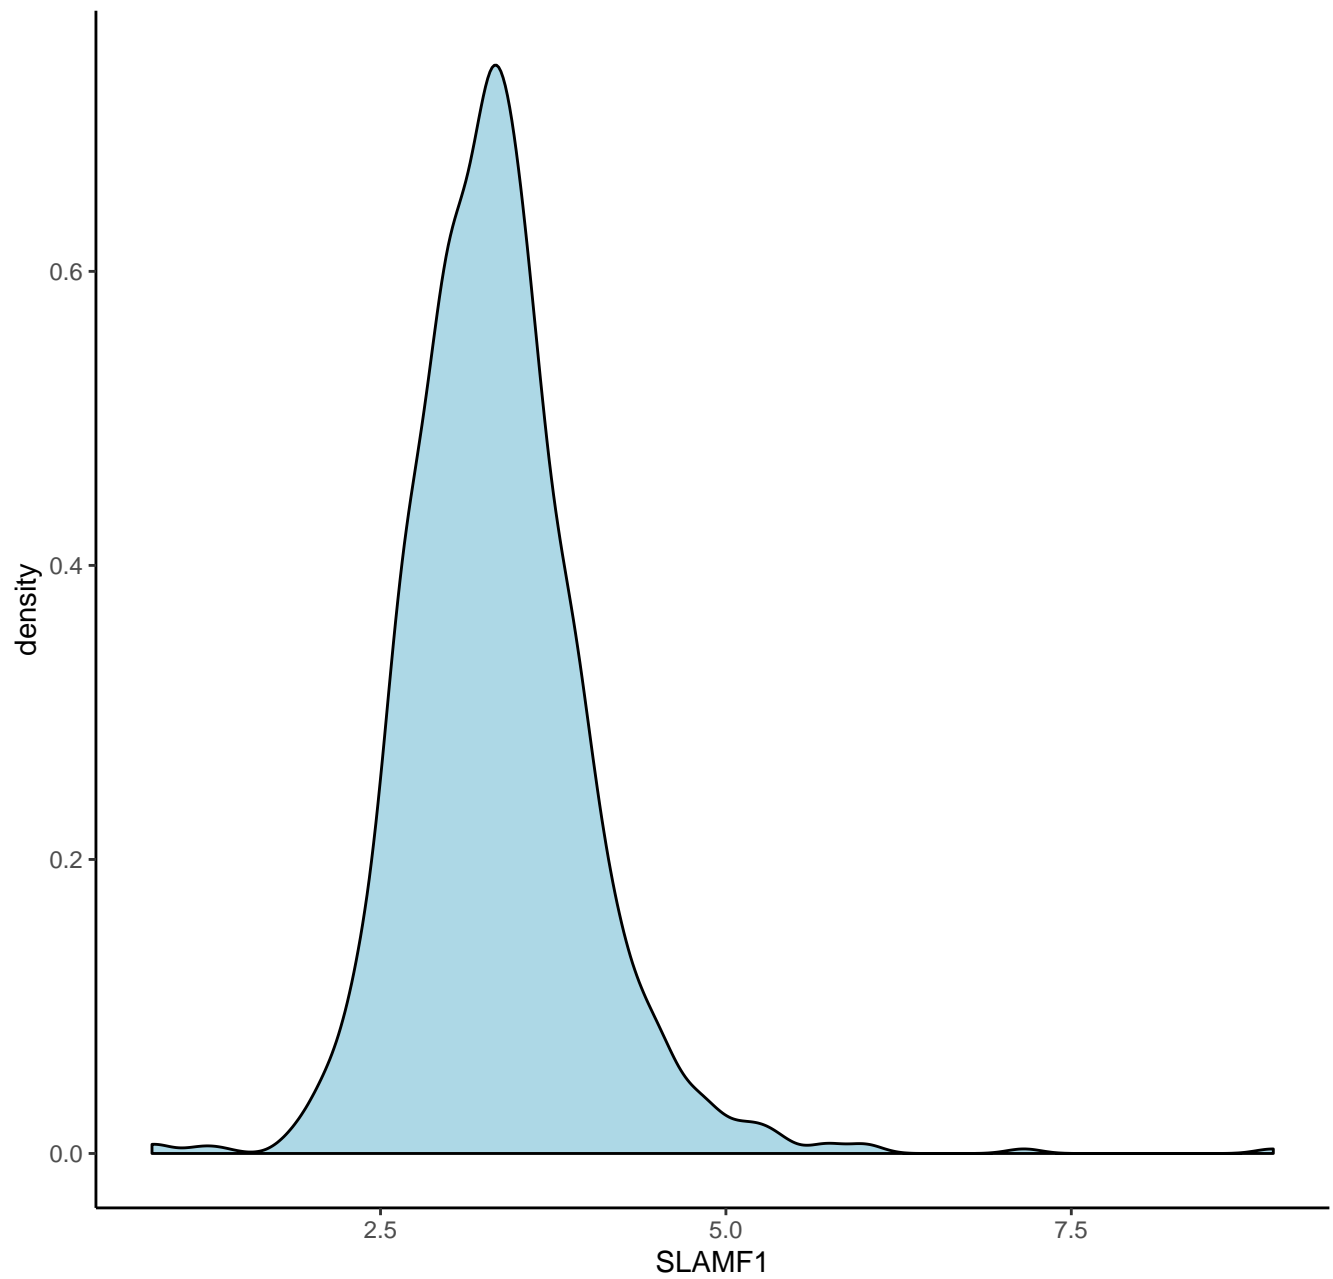

Pre-adjusted ST1A1 Distribution

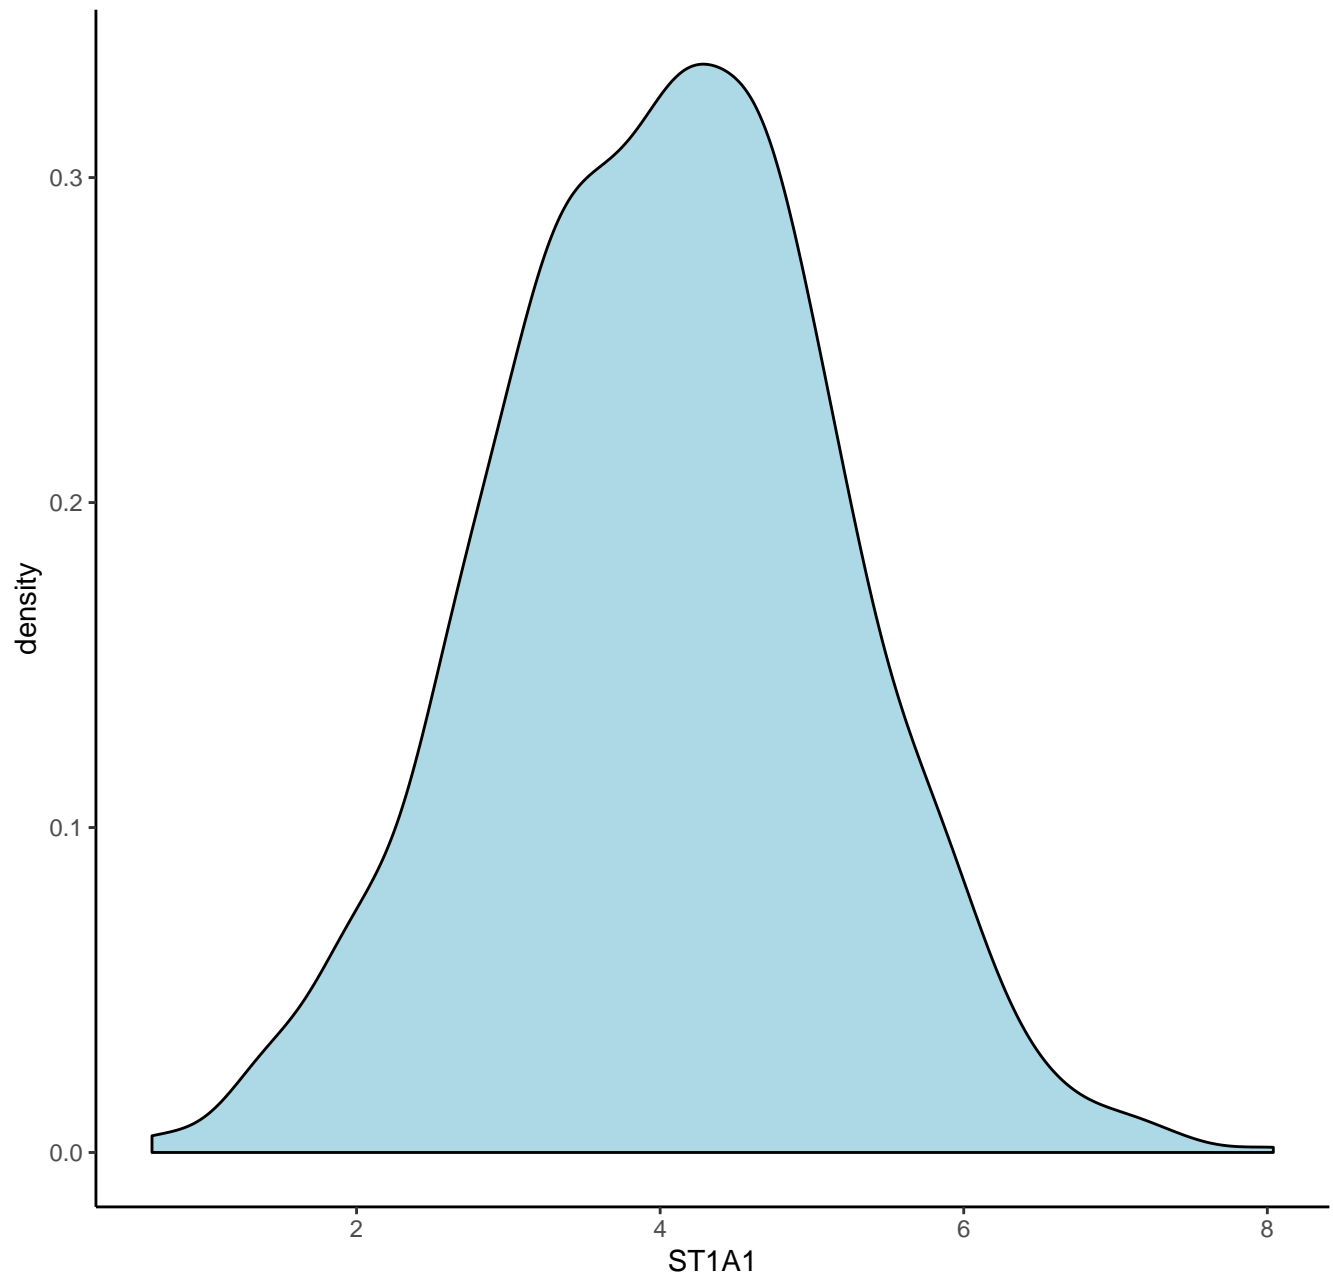

Pre-adjusted STAMBP Distribution

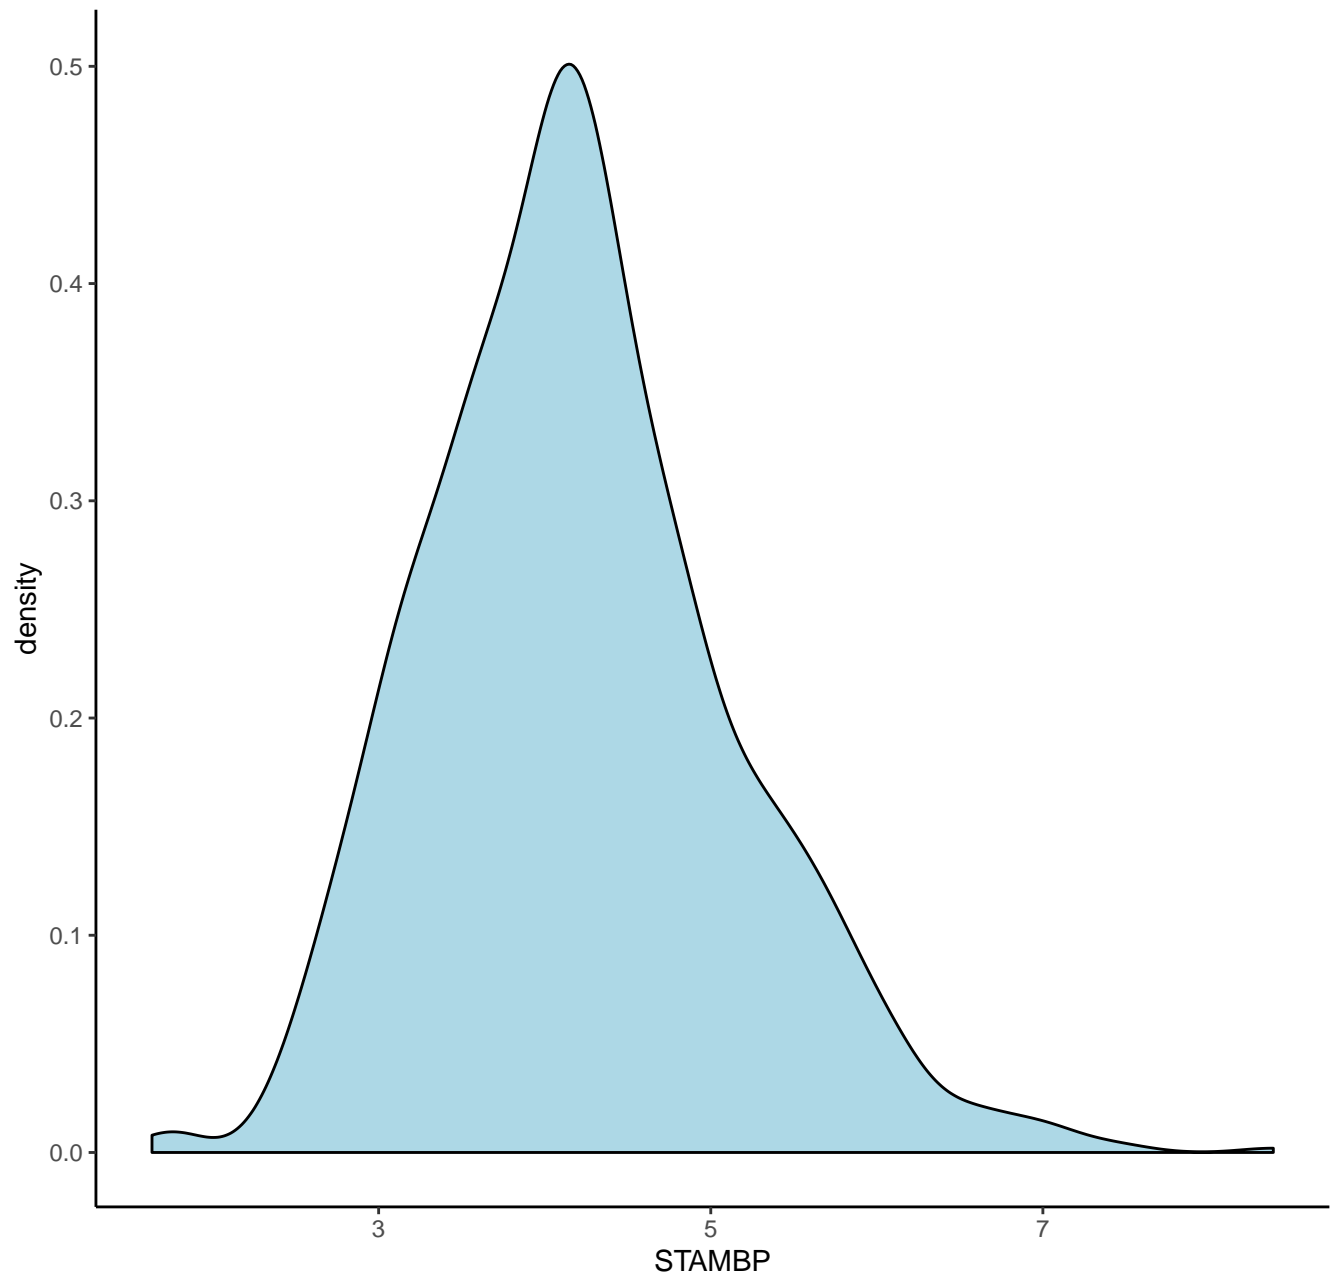

Pre-adjusted TGF.alpha Distribution

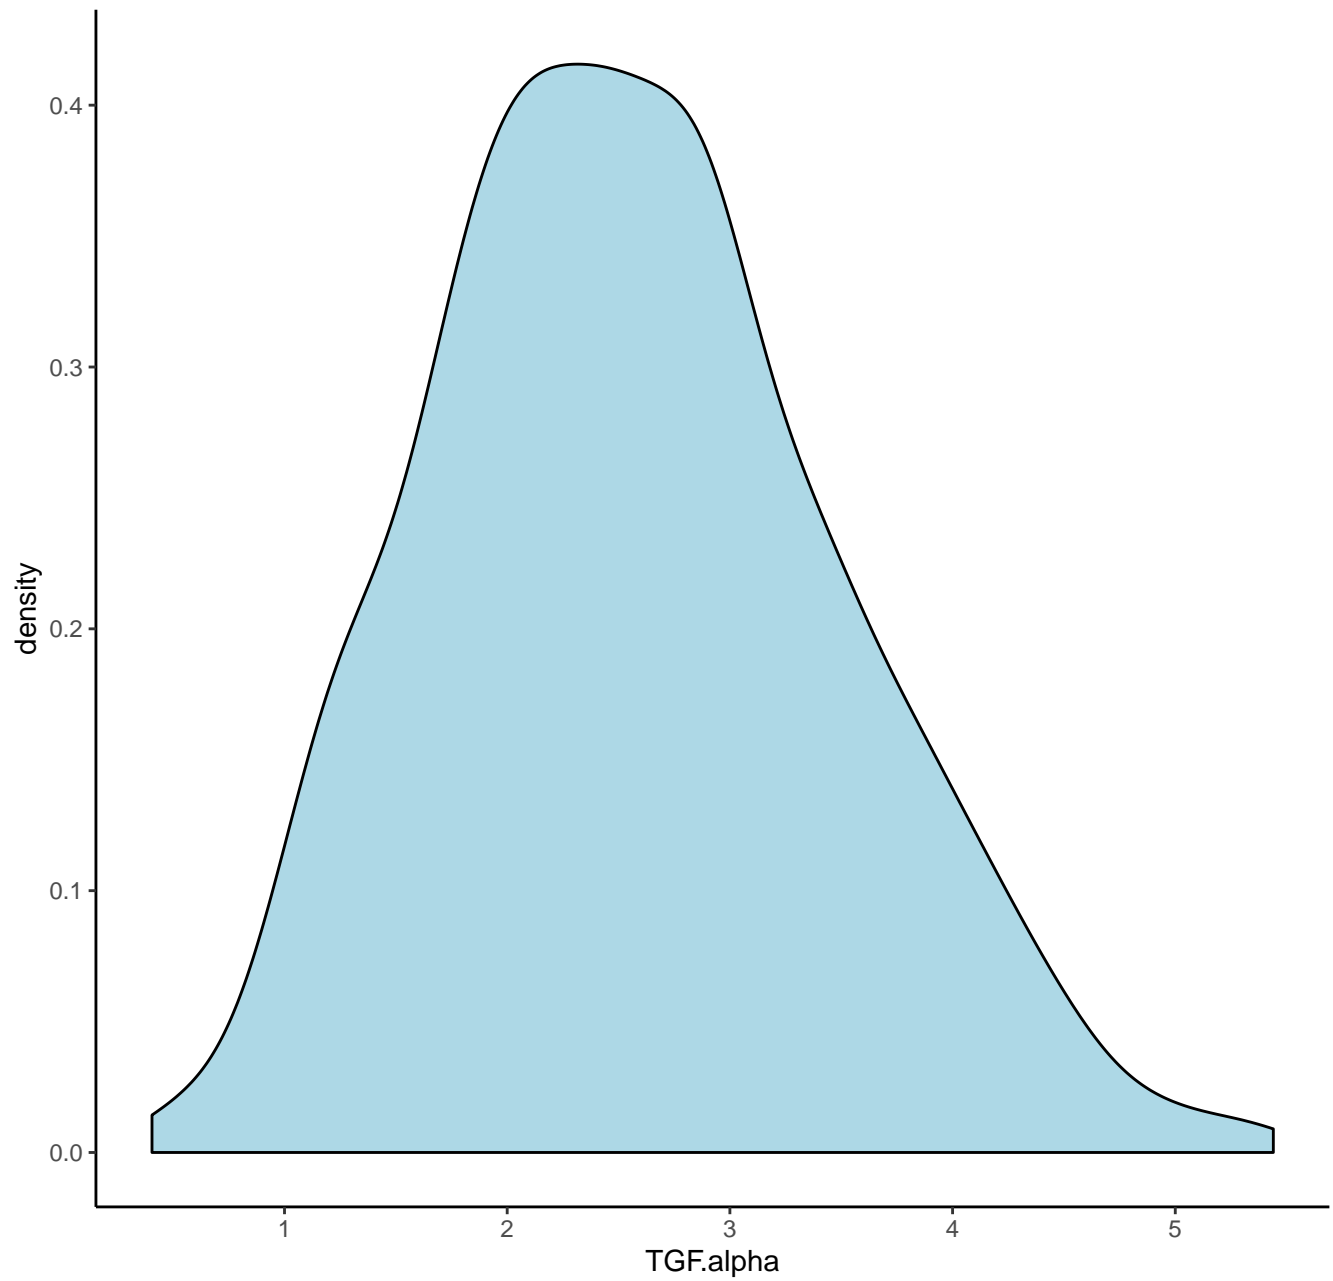

Pre-adjusted TNFB Distribution

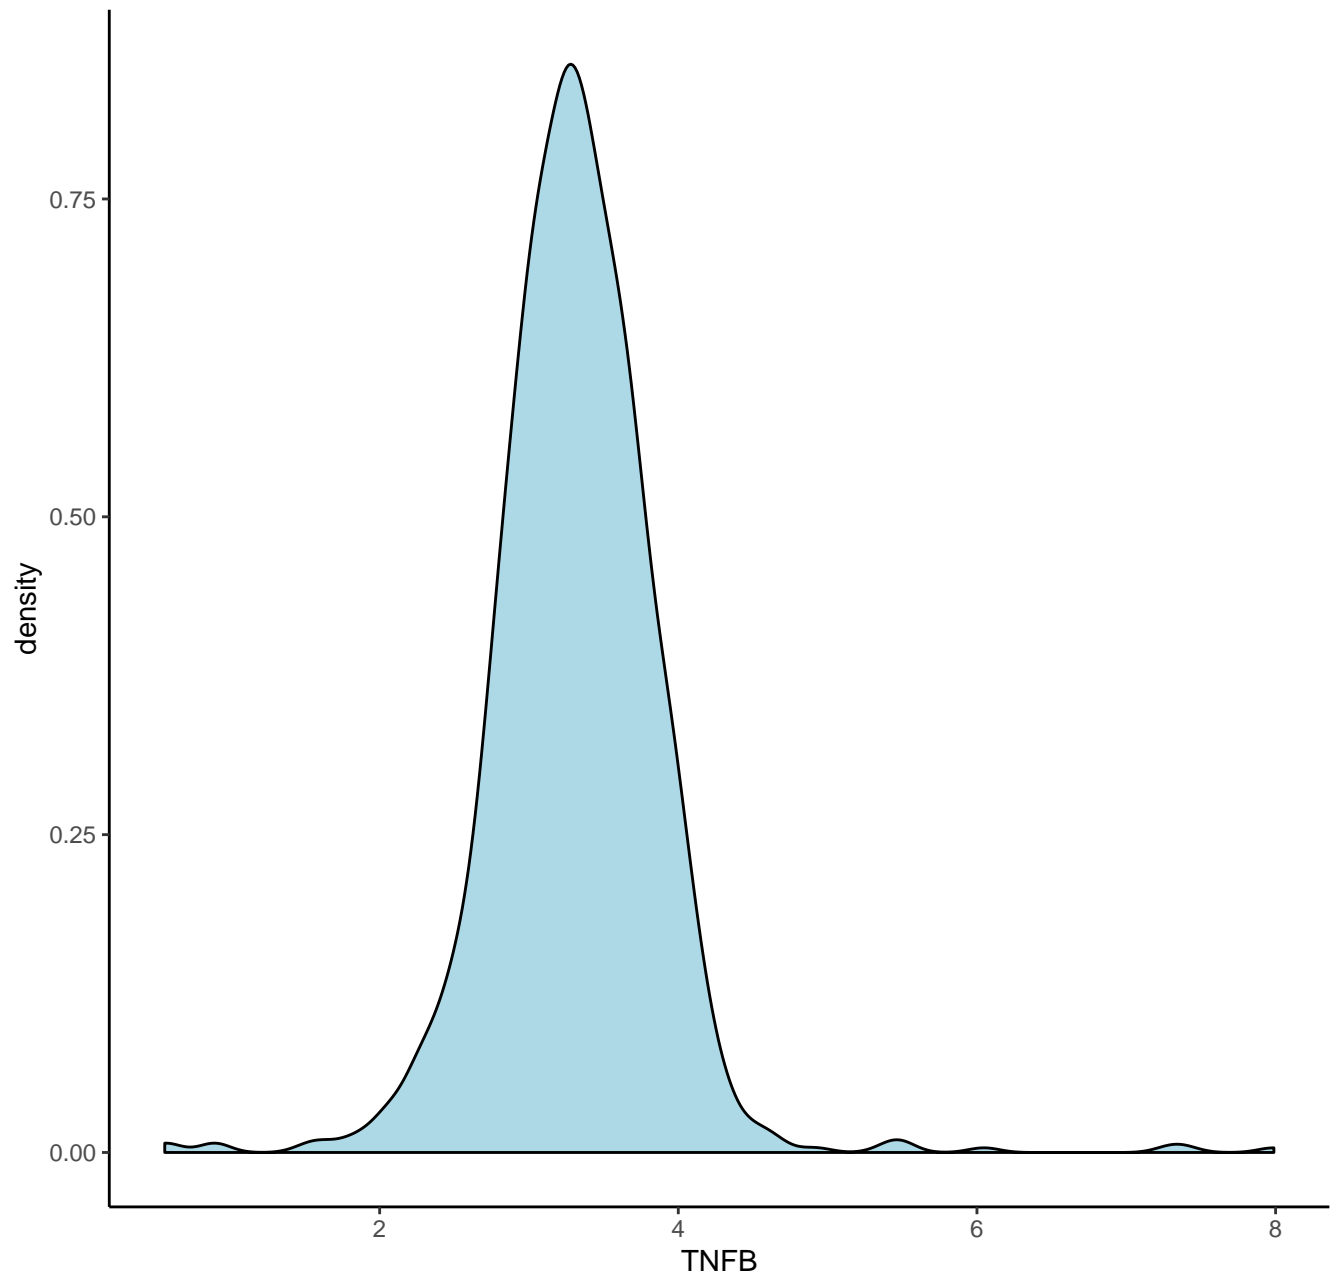

Pre-adjusted TNFRSF9 Distribution

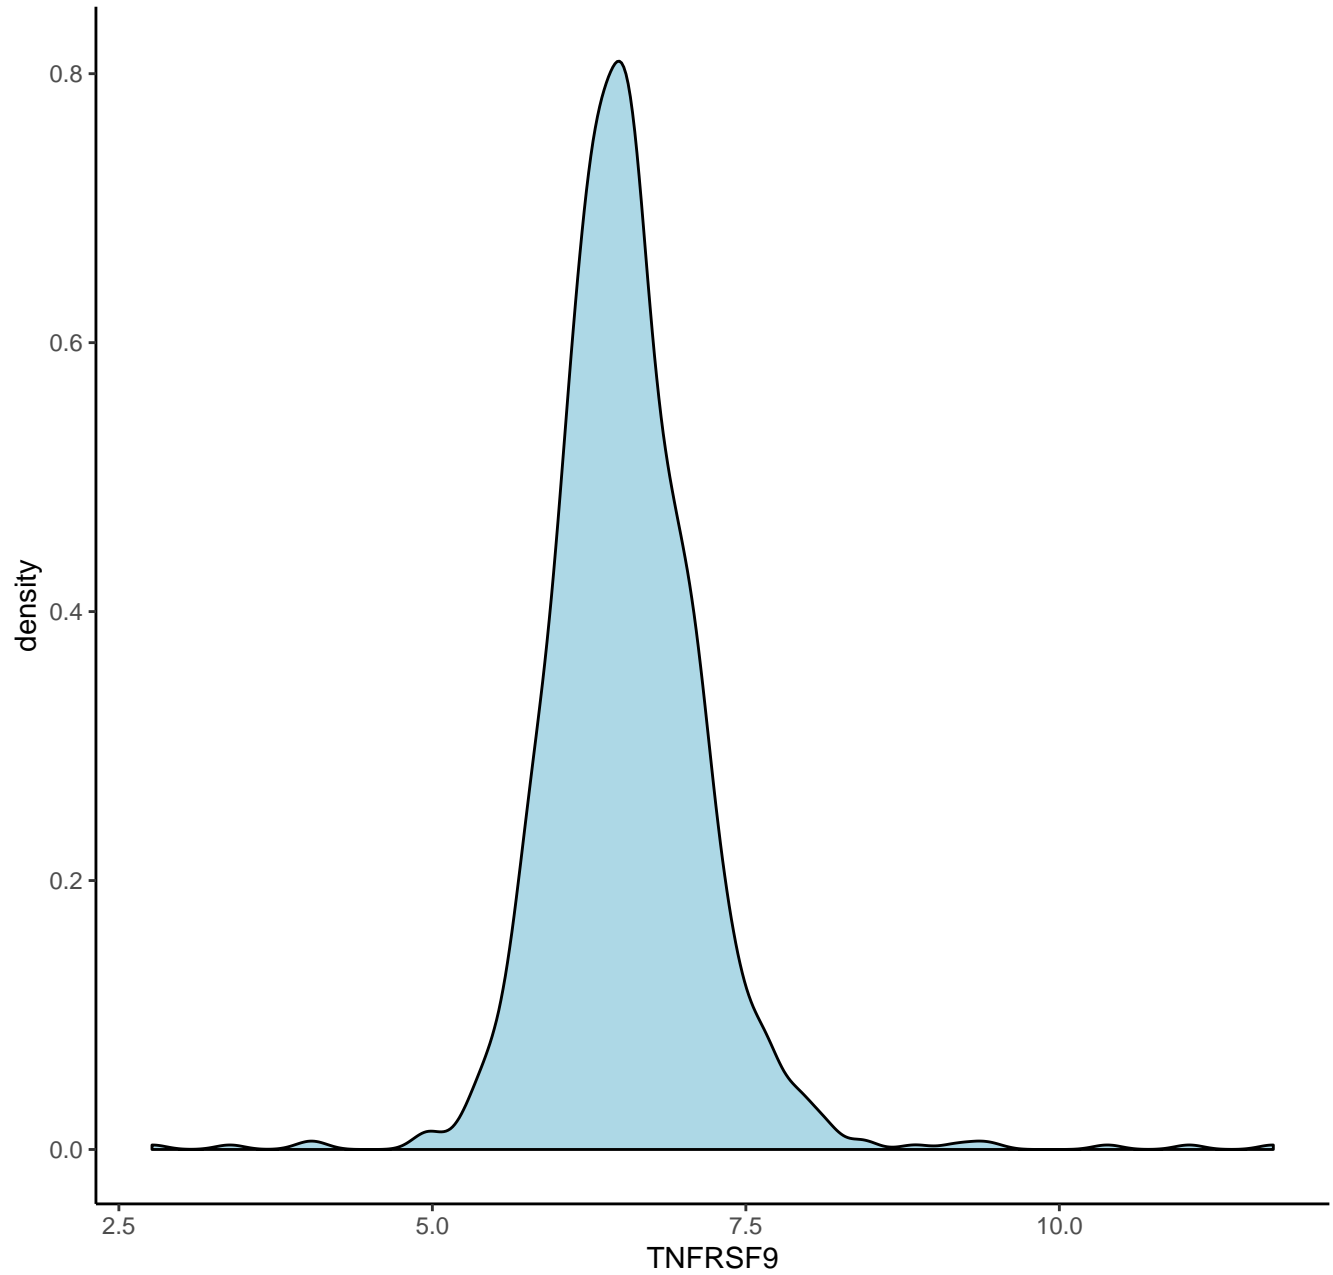

Pre-adjusted TNFSF14 Distribution

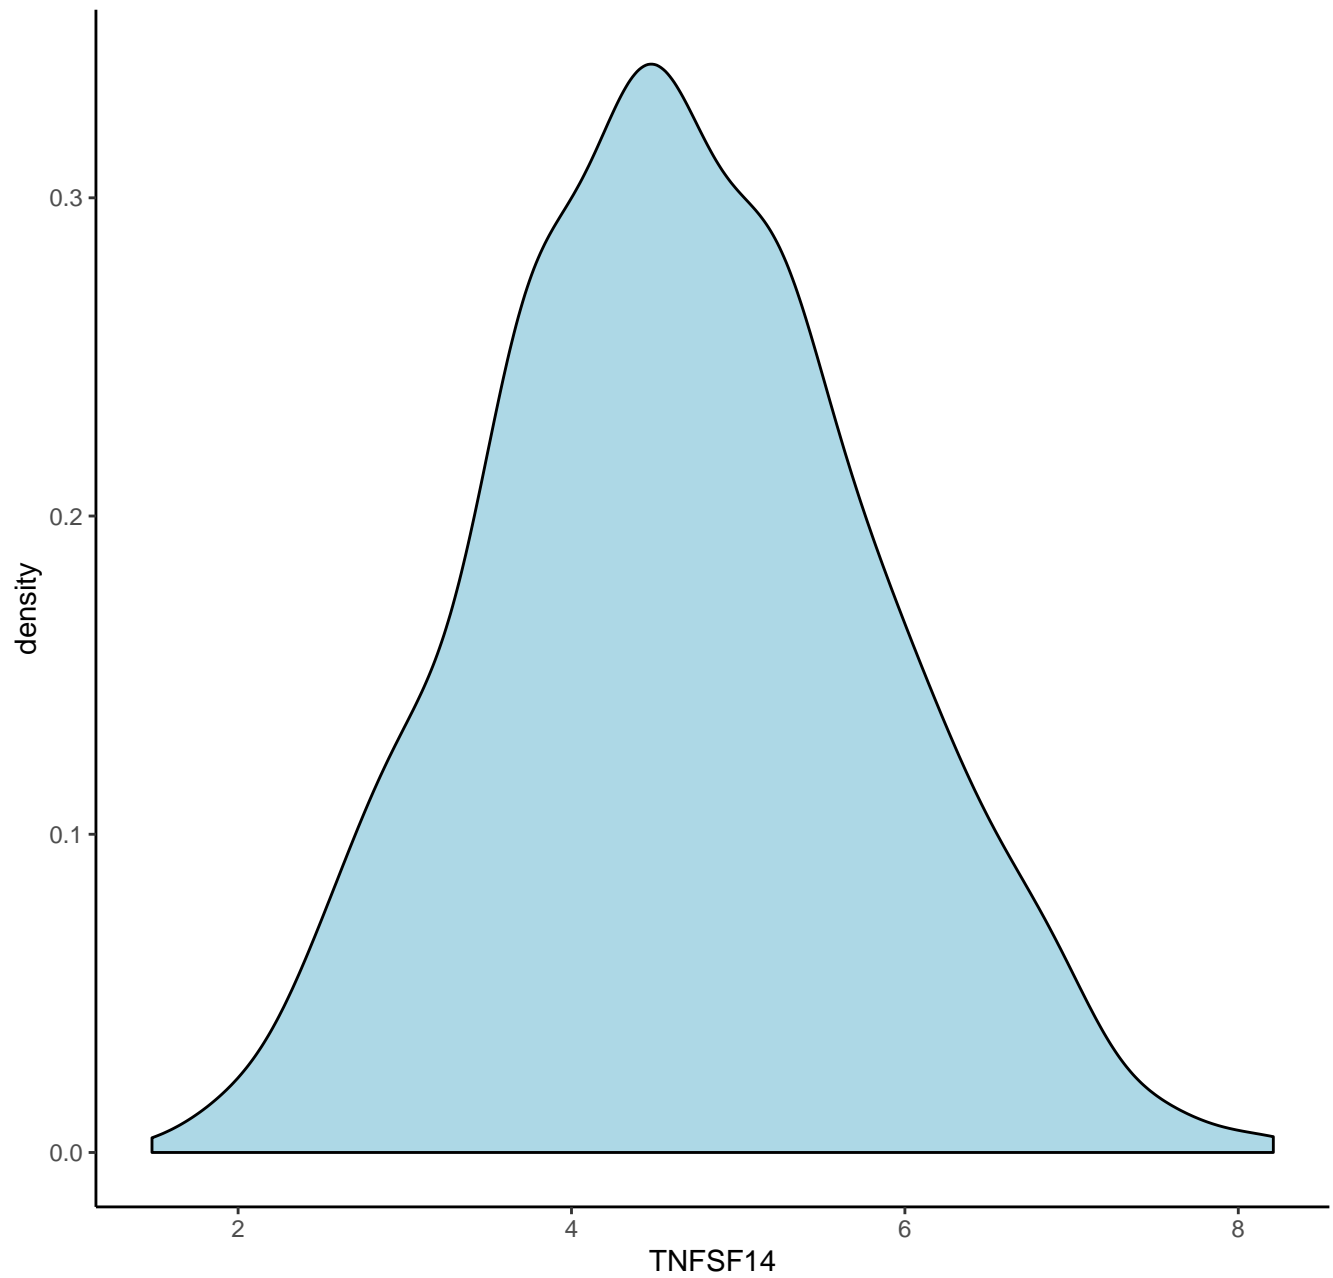



Pre-adjusted TRAIL Distribution

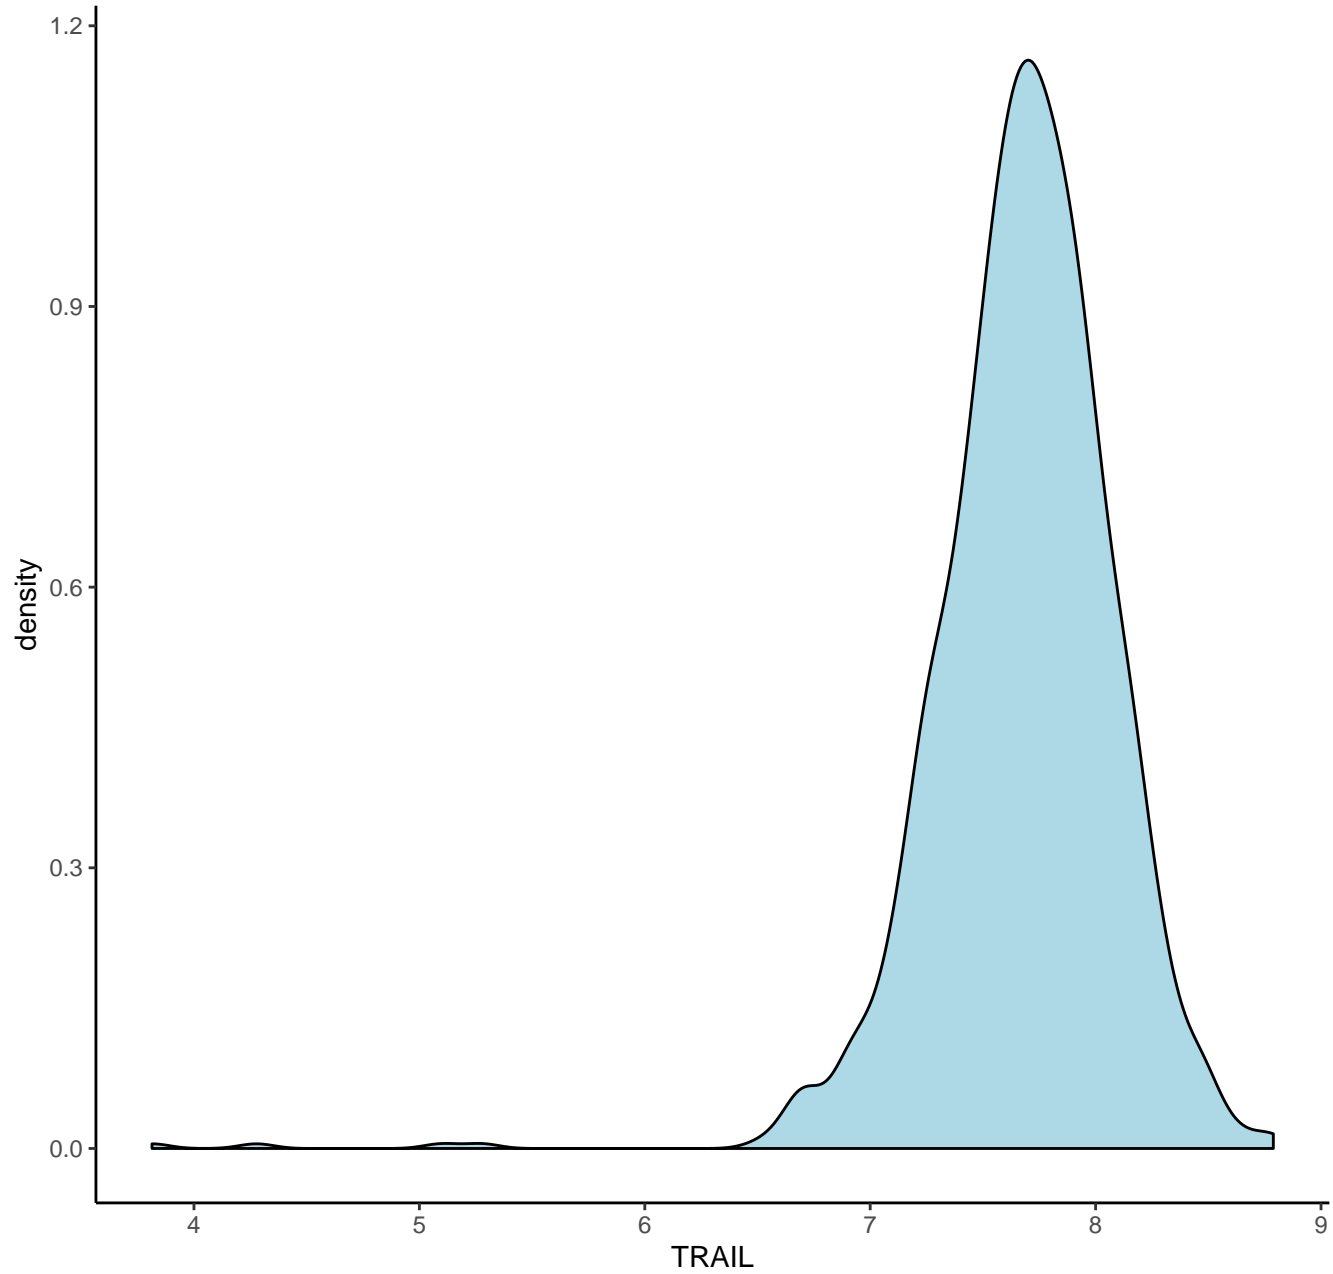

Pre-adjusted TRANCE Distribution

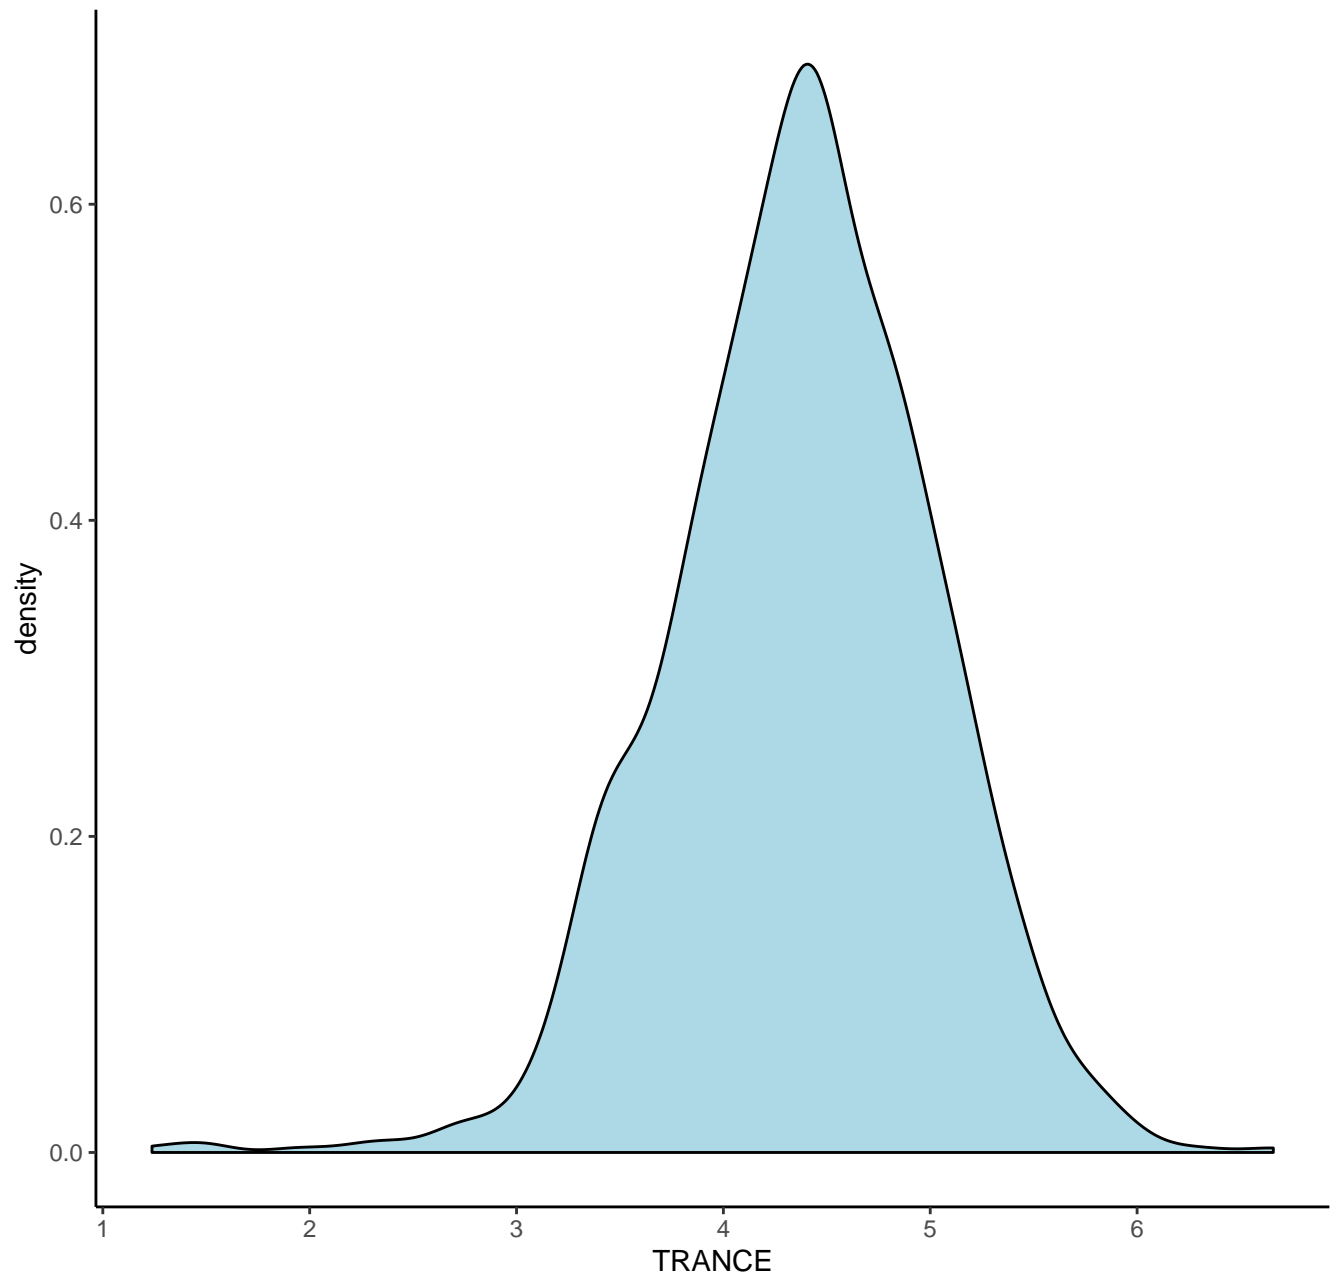

Pre-adjusted TWEAK Distribution

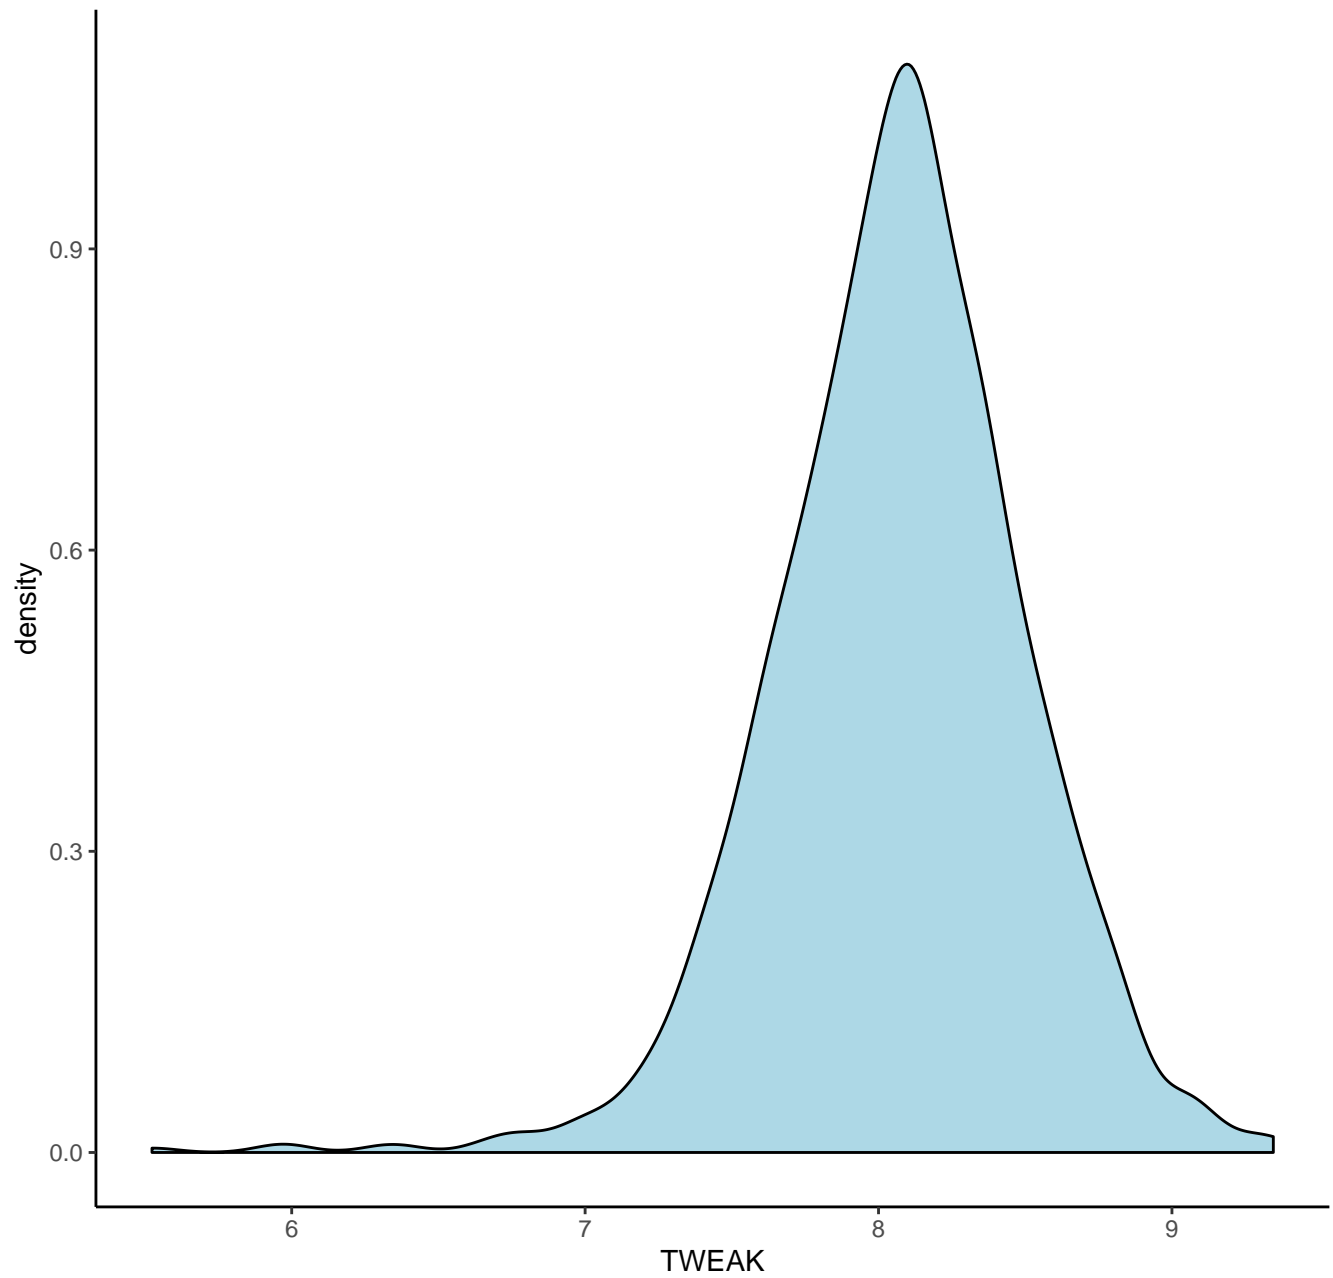

Pre-adjusted uPA Distribution

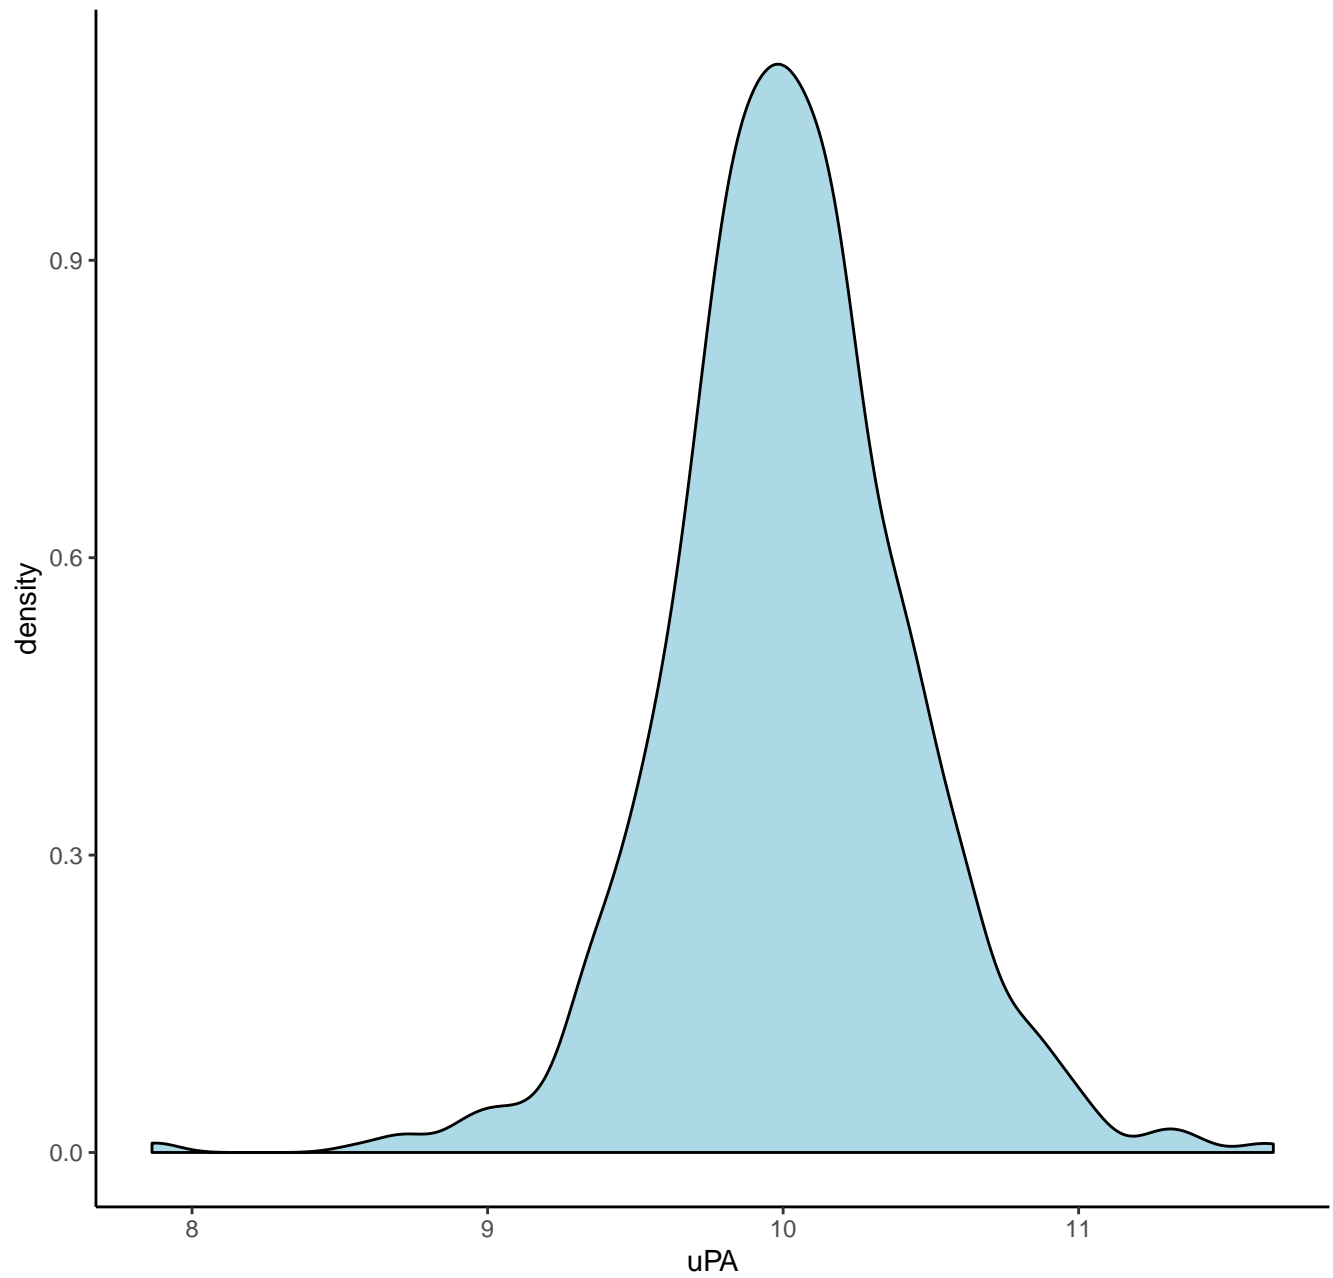

Pre-adjusted VEGFA Distribution

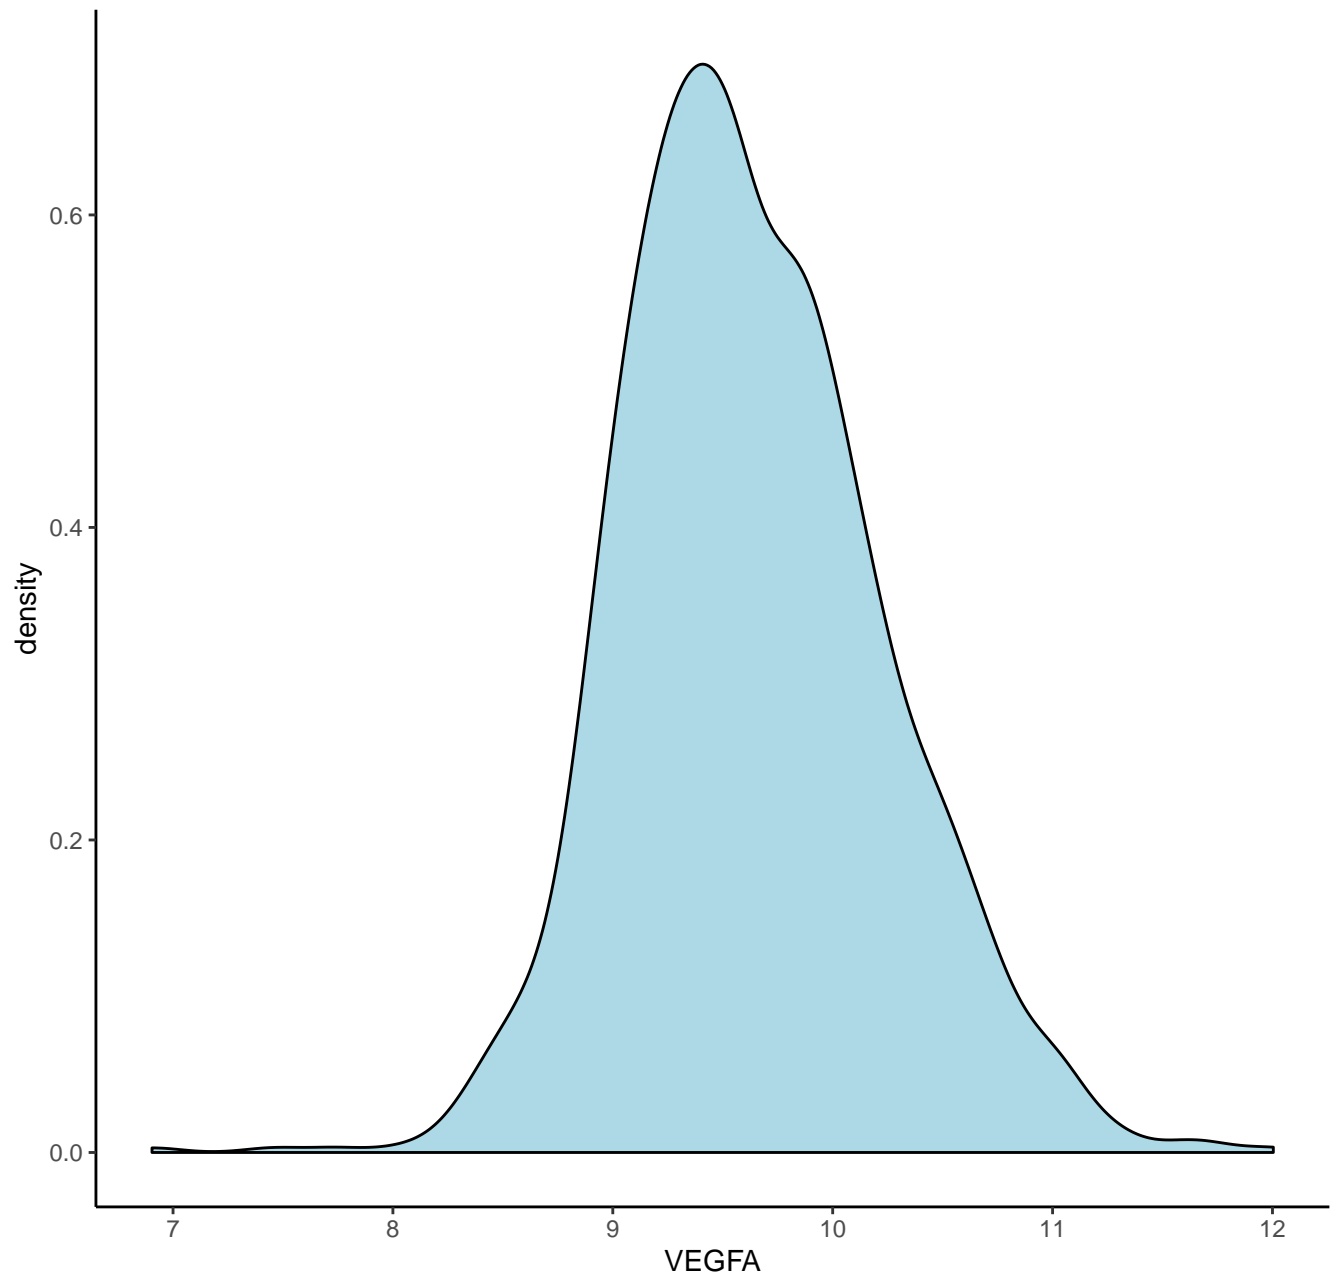

Pre-adjusted 4E.BP1 Distribution

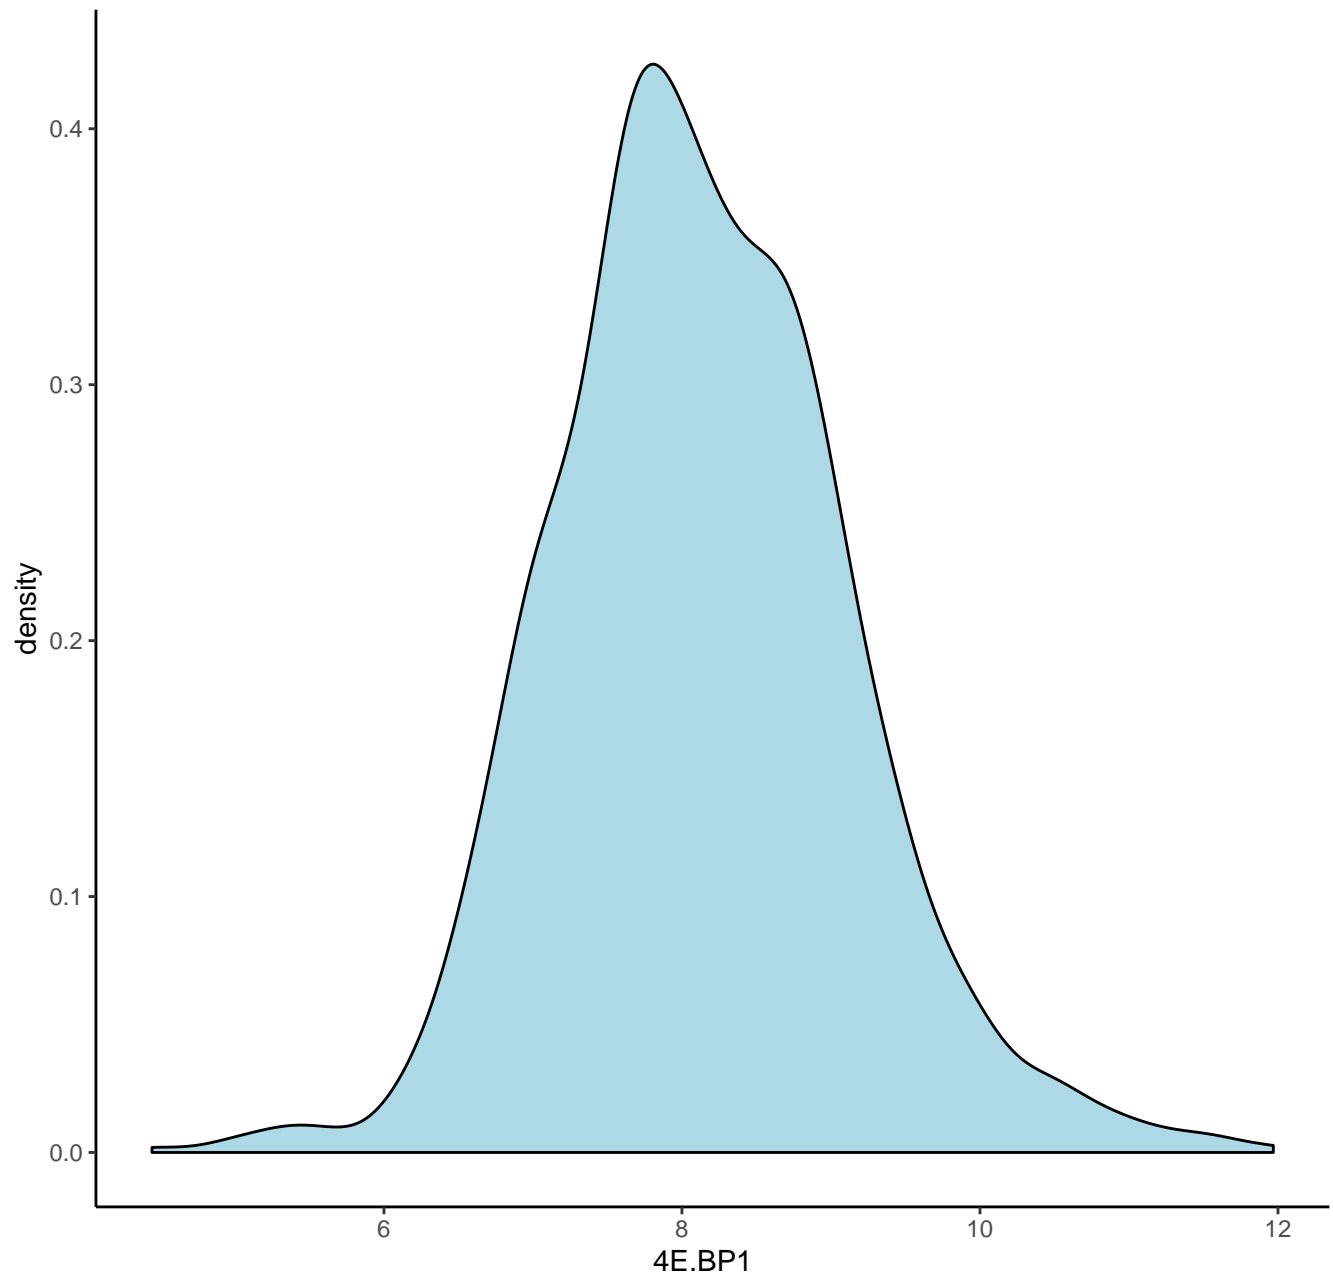

Supplement: 13073_2020_754_MOESM1_ESM.pdf [file 13073_2020_754_MOESM1_ESM.pdf]
