# Supplementary material for: Multi-method genome- and epigenome-wide studies of inflammatory protein levels in healthy older adults
Source: PubMed Central journal article supplement (PMC7346642; doi:10.1186/s13073-020-00754-1), 2020-07-08

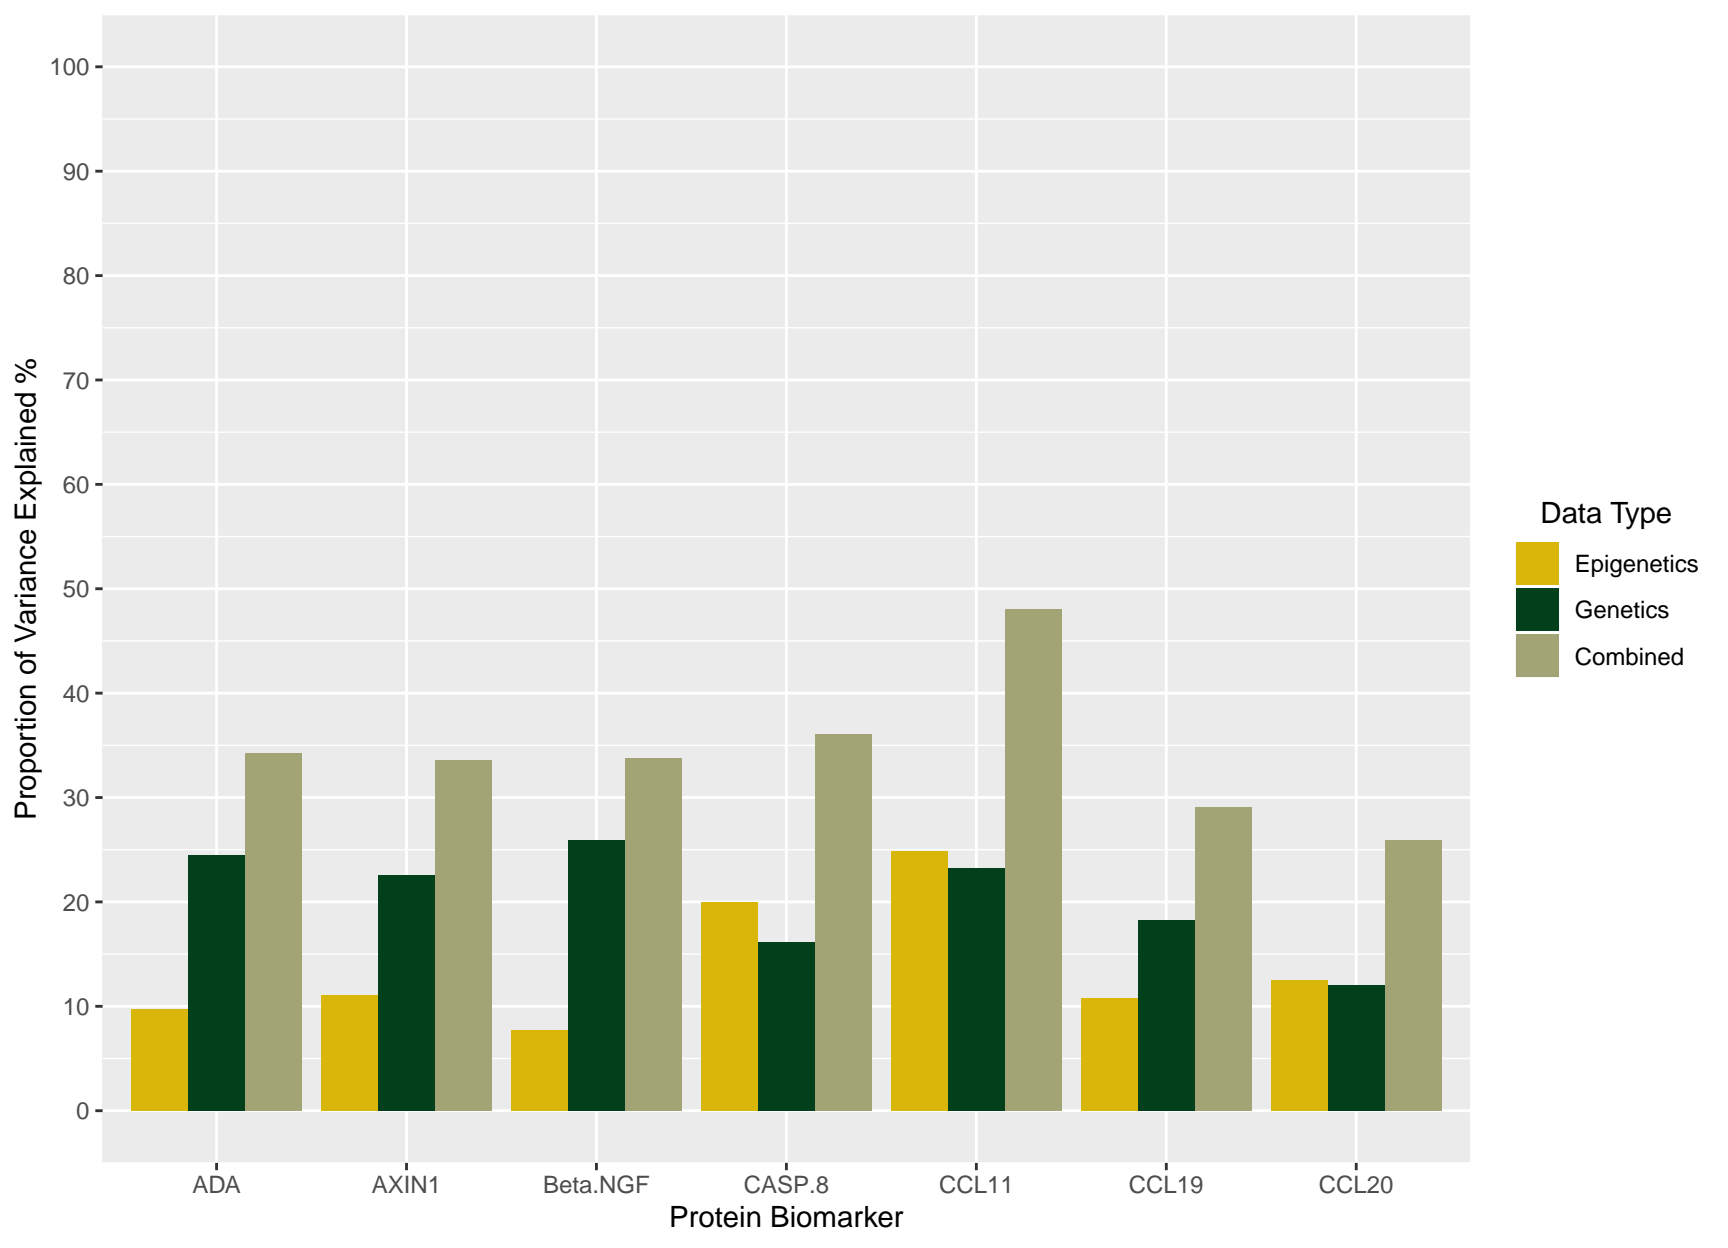

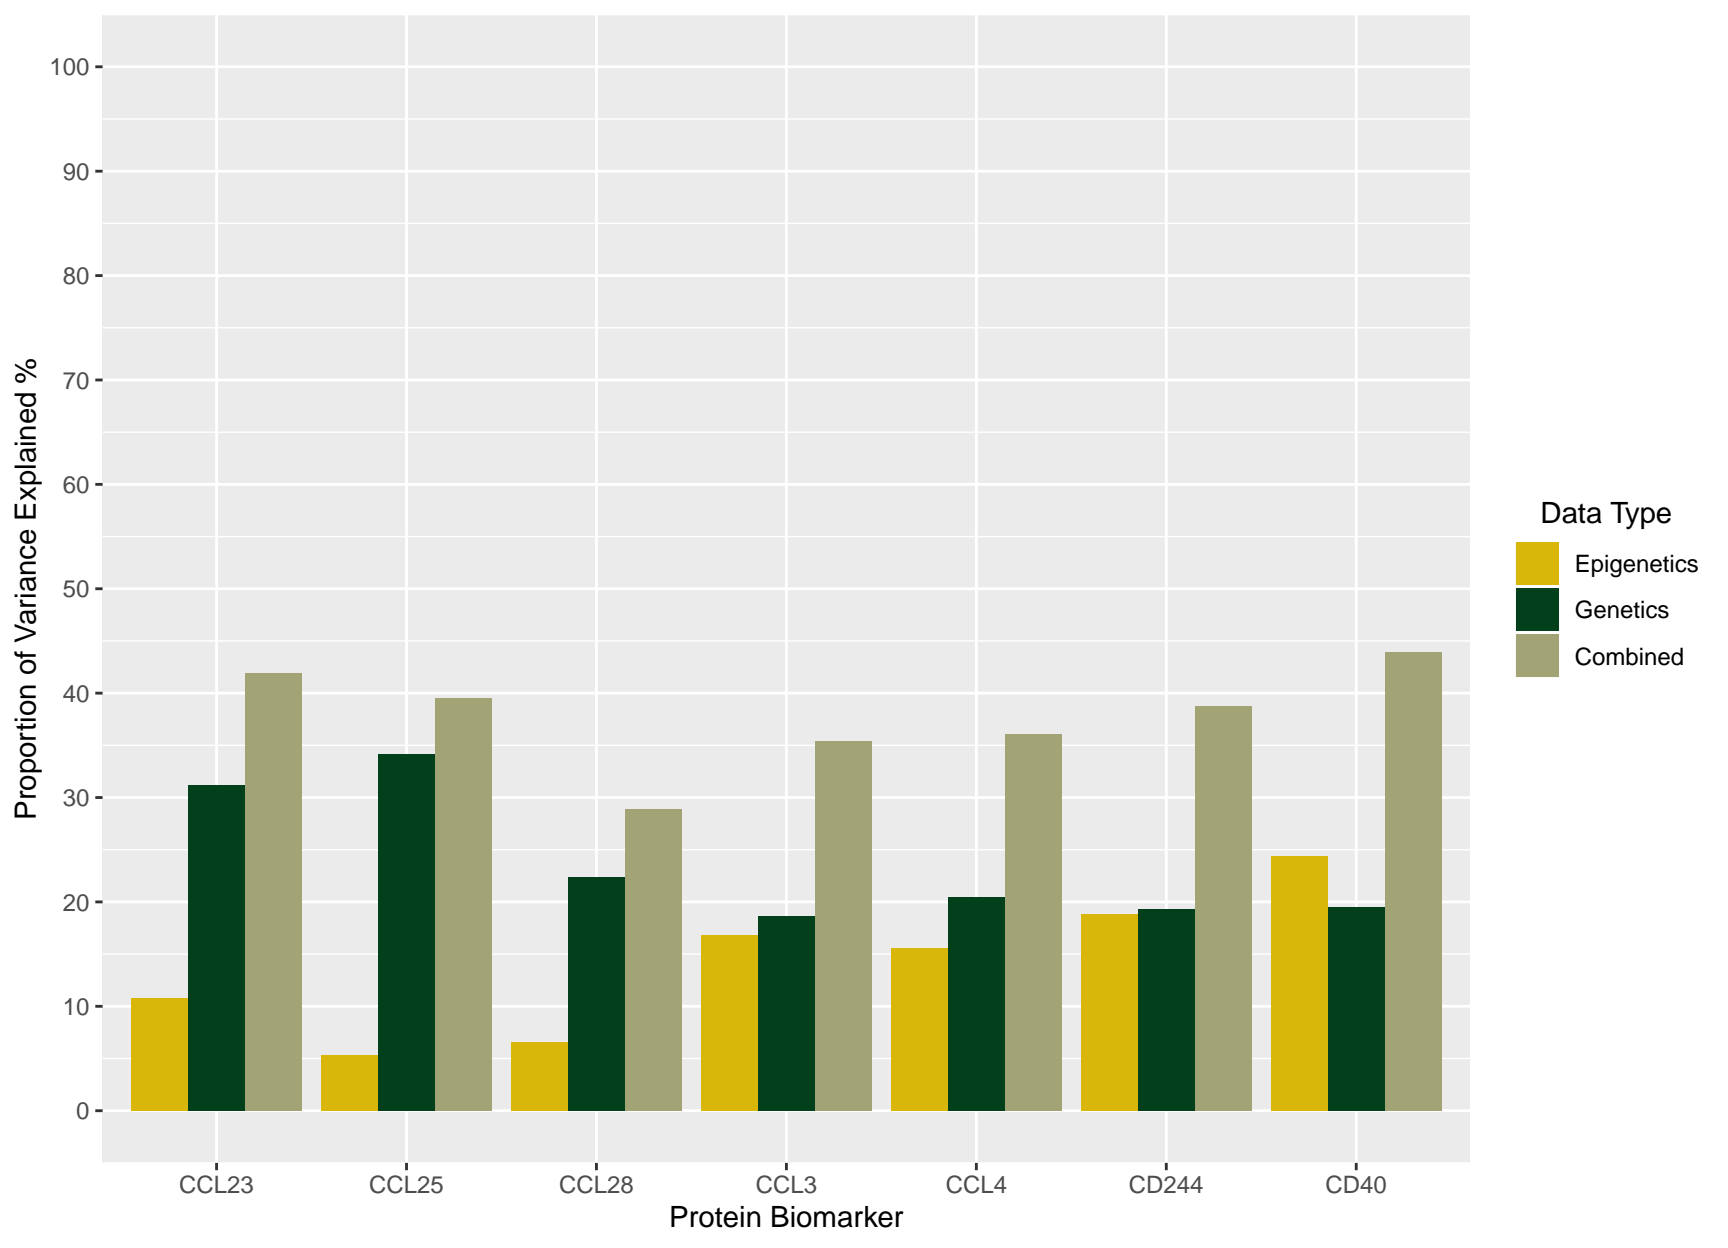

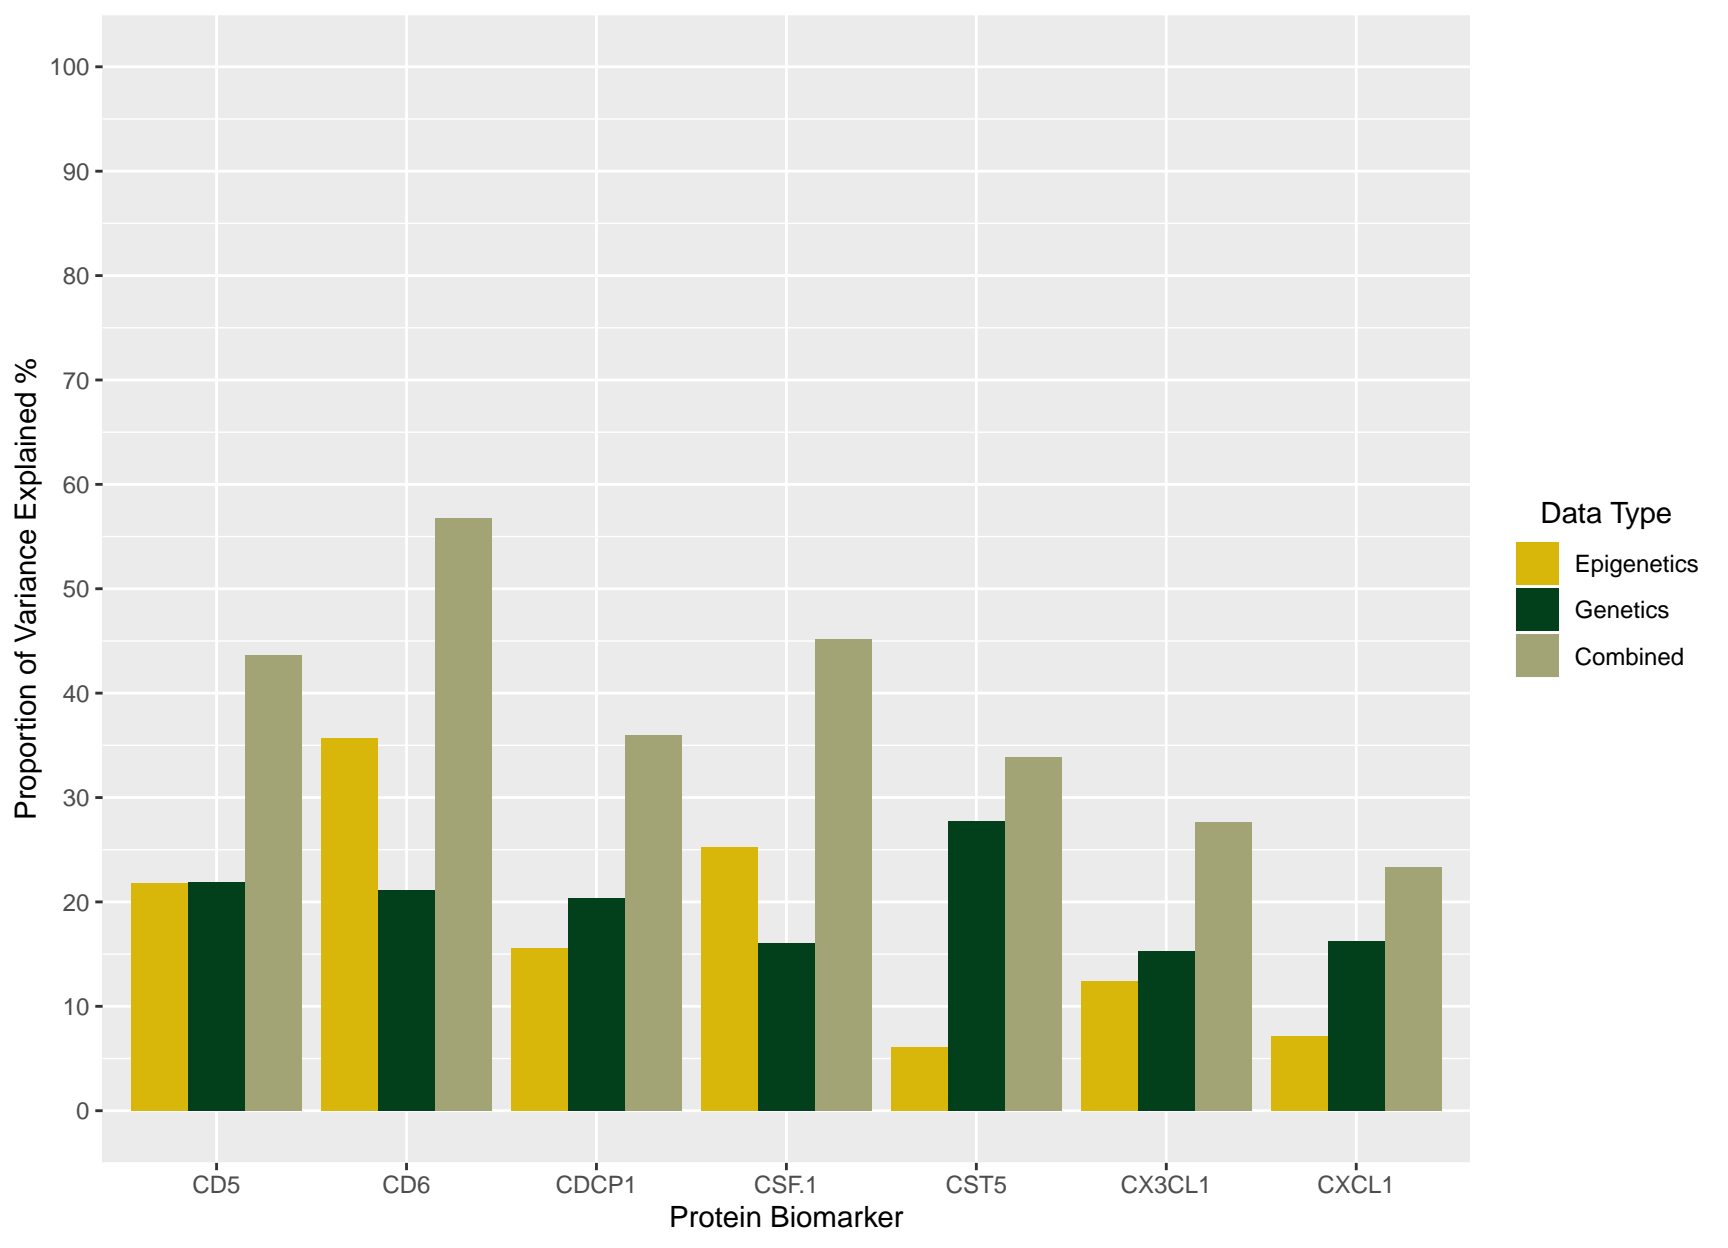

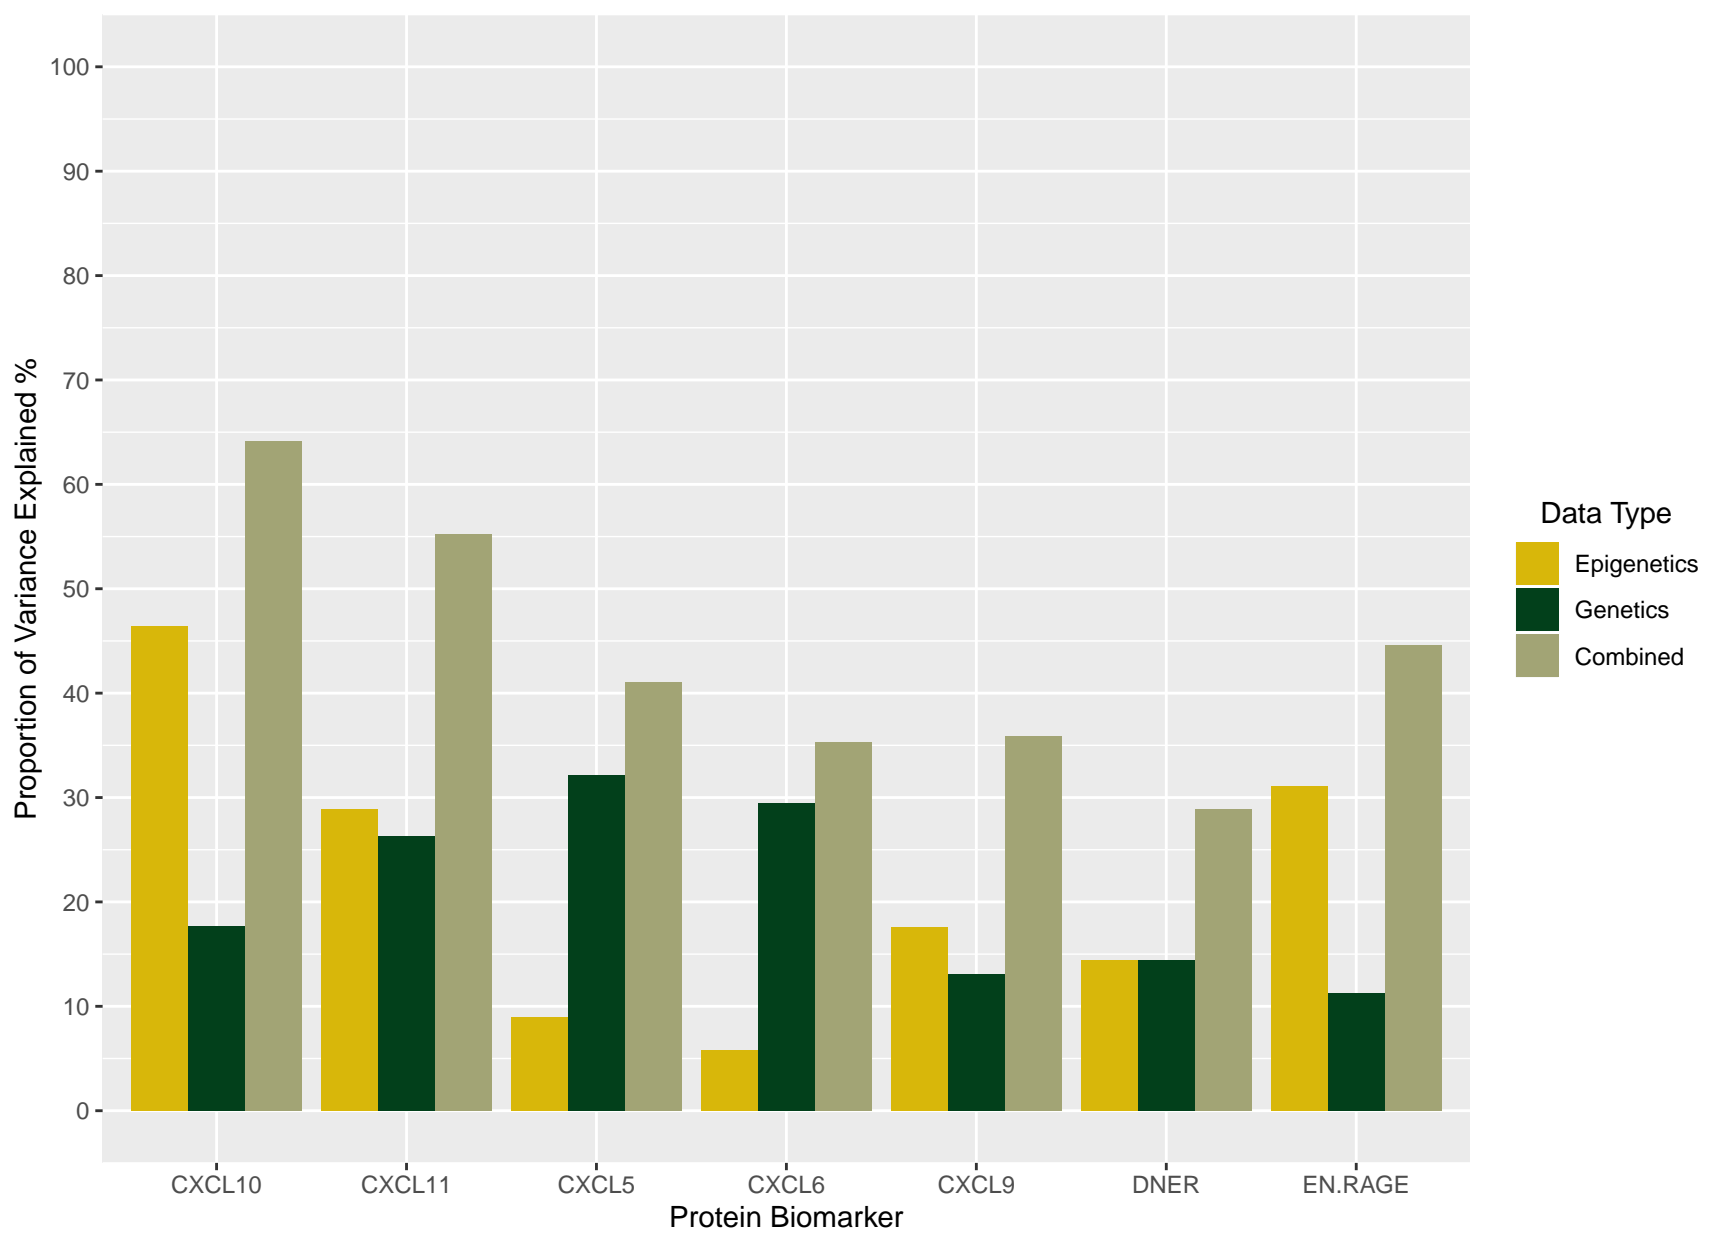

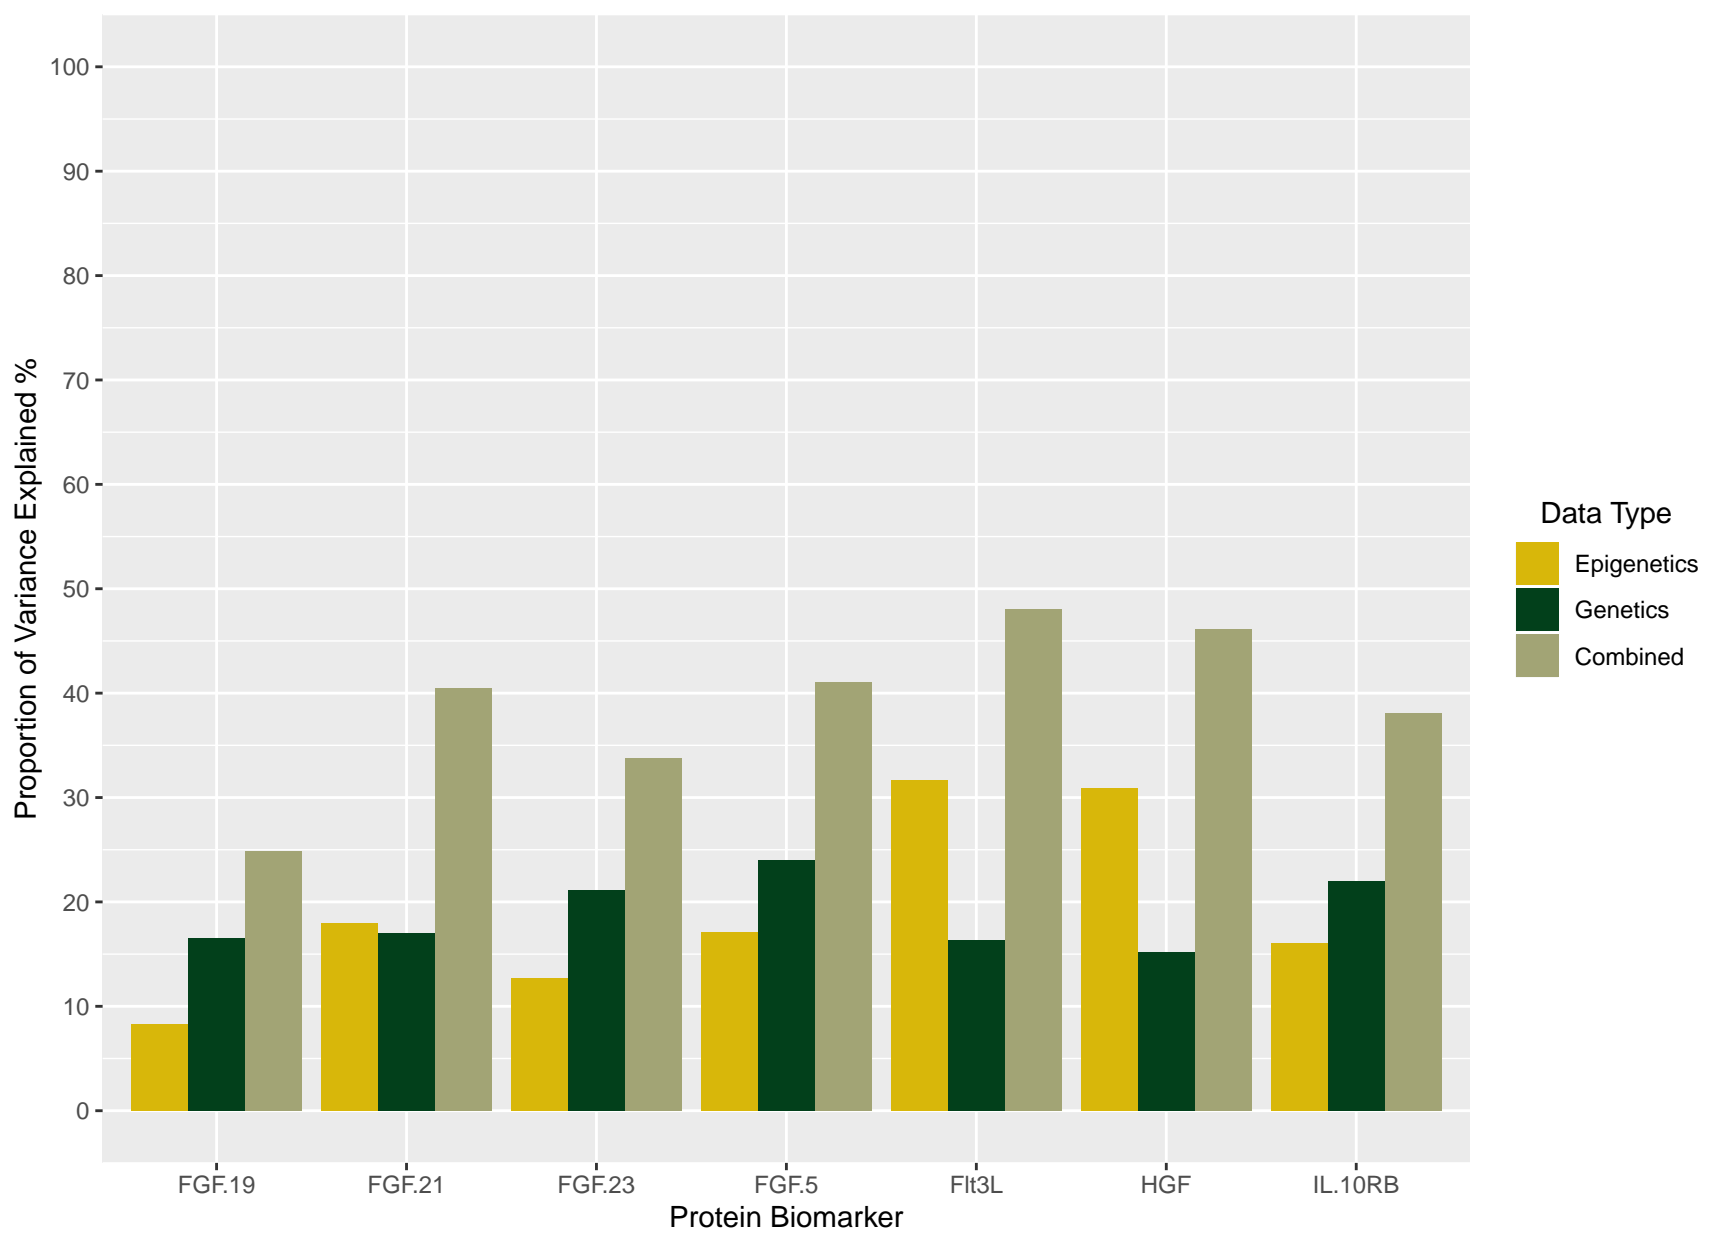

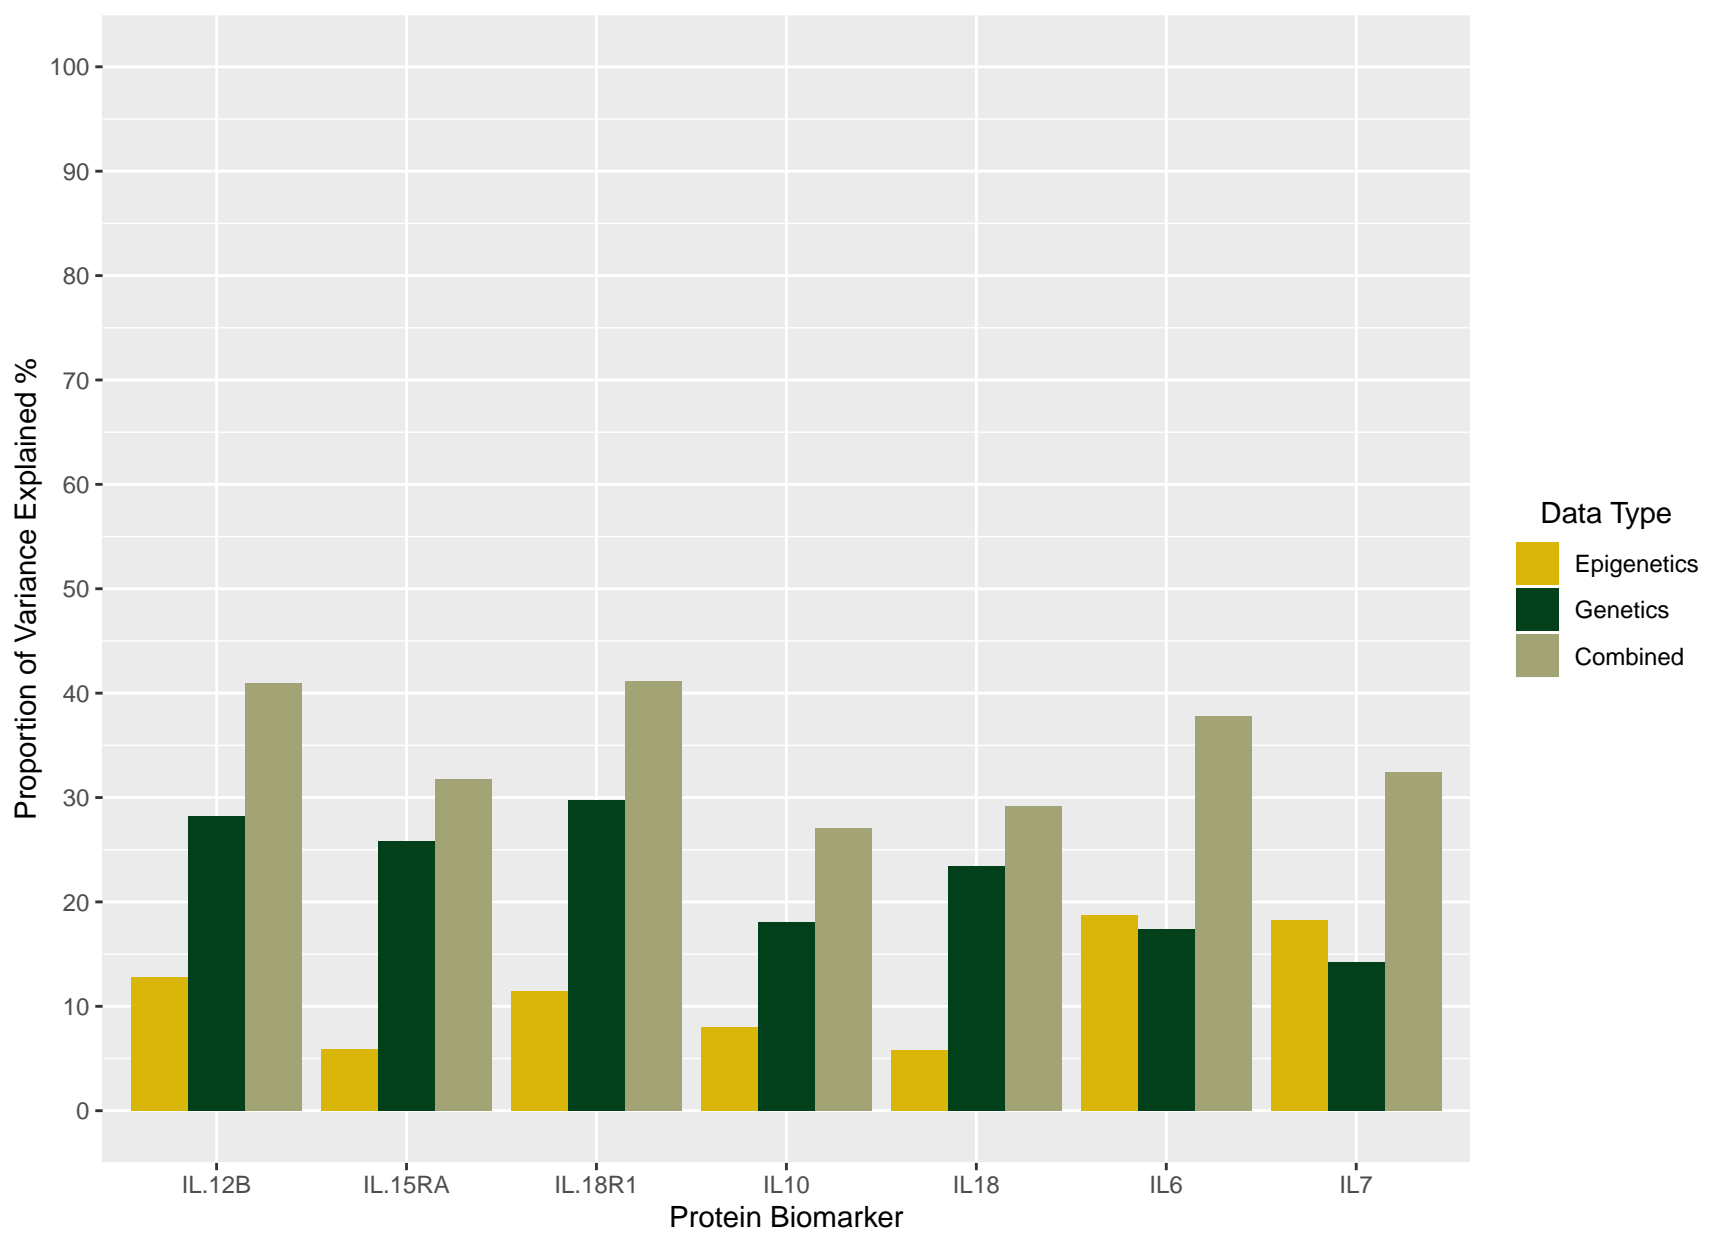

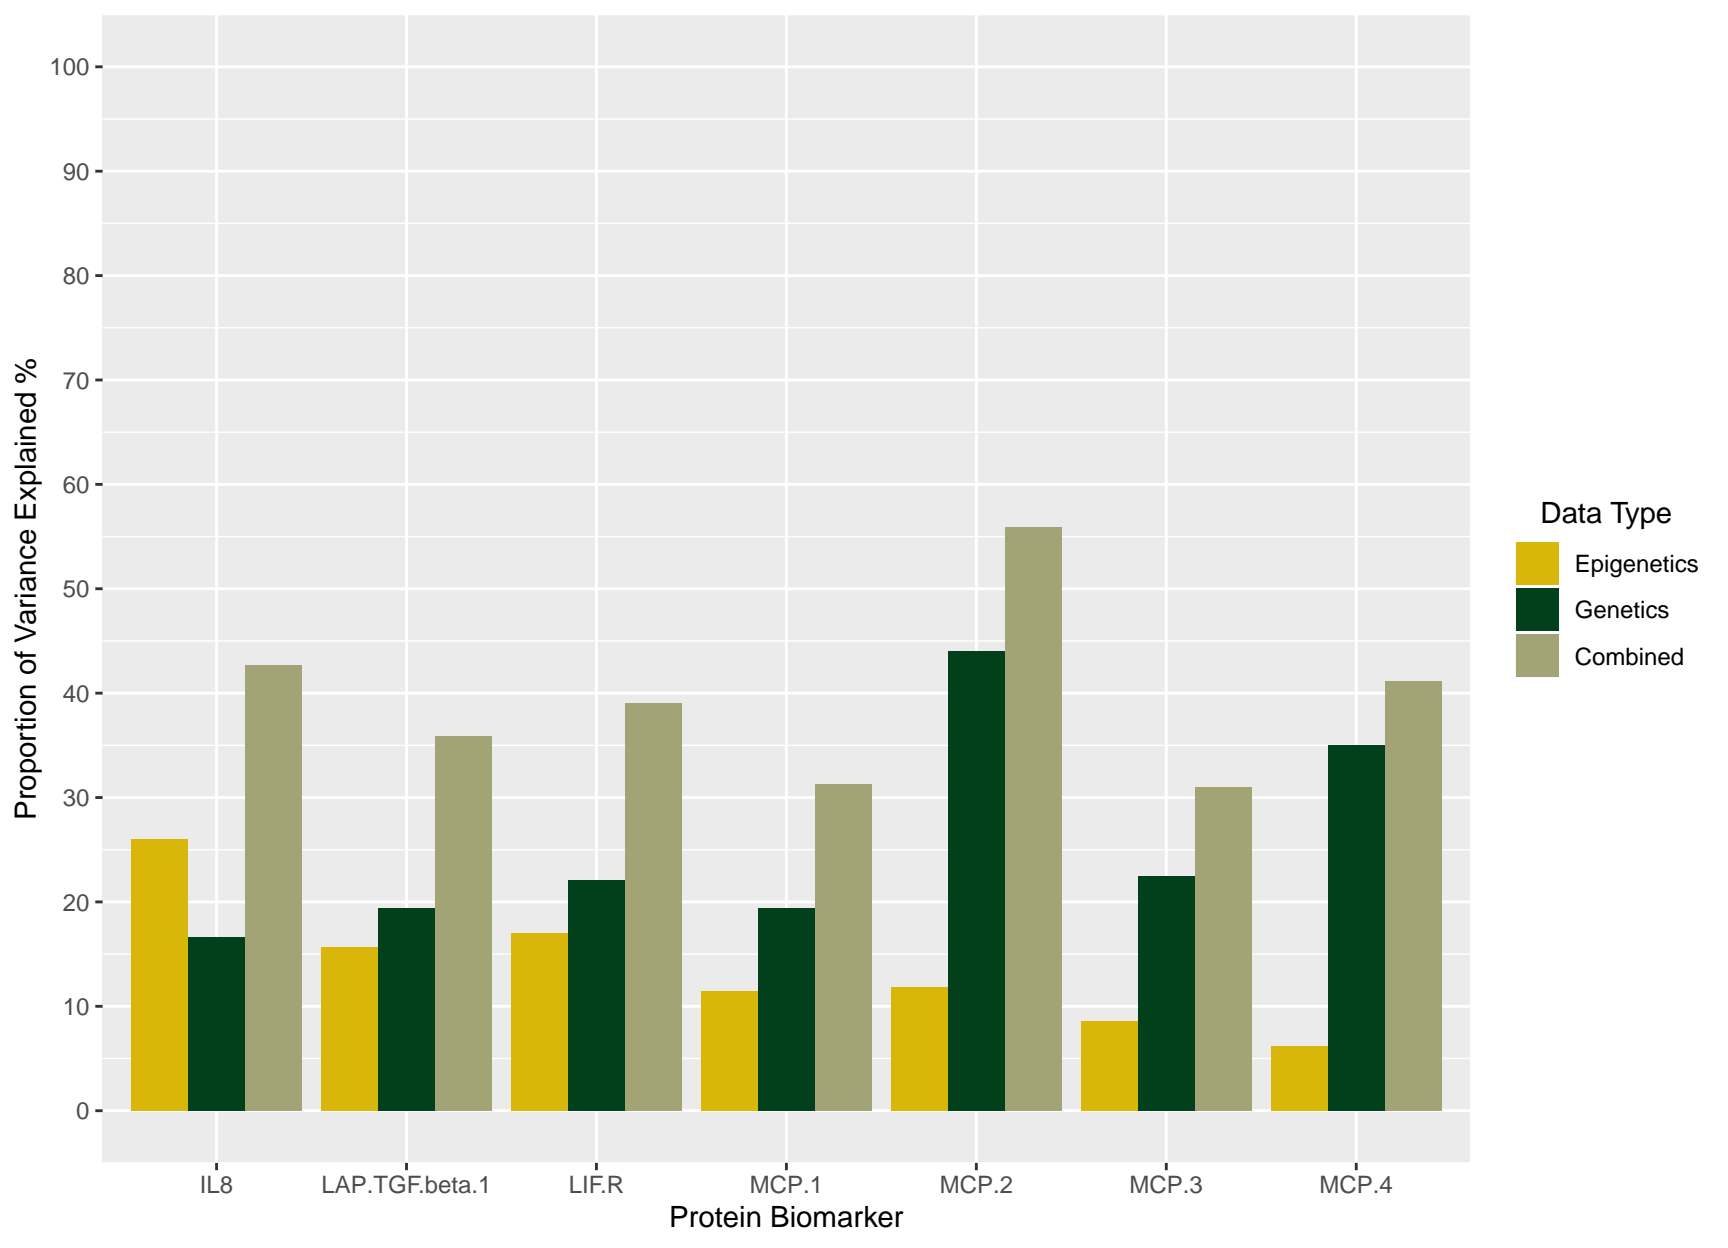

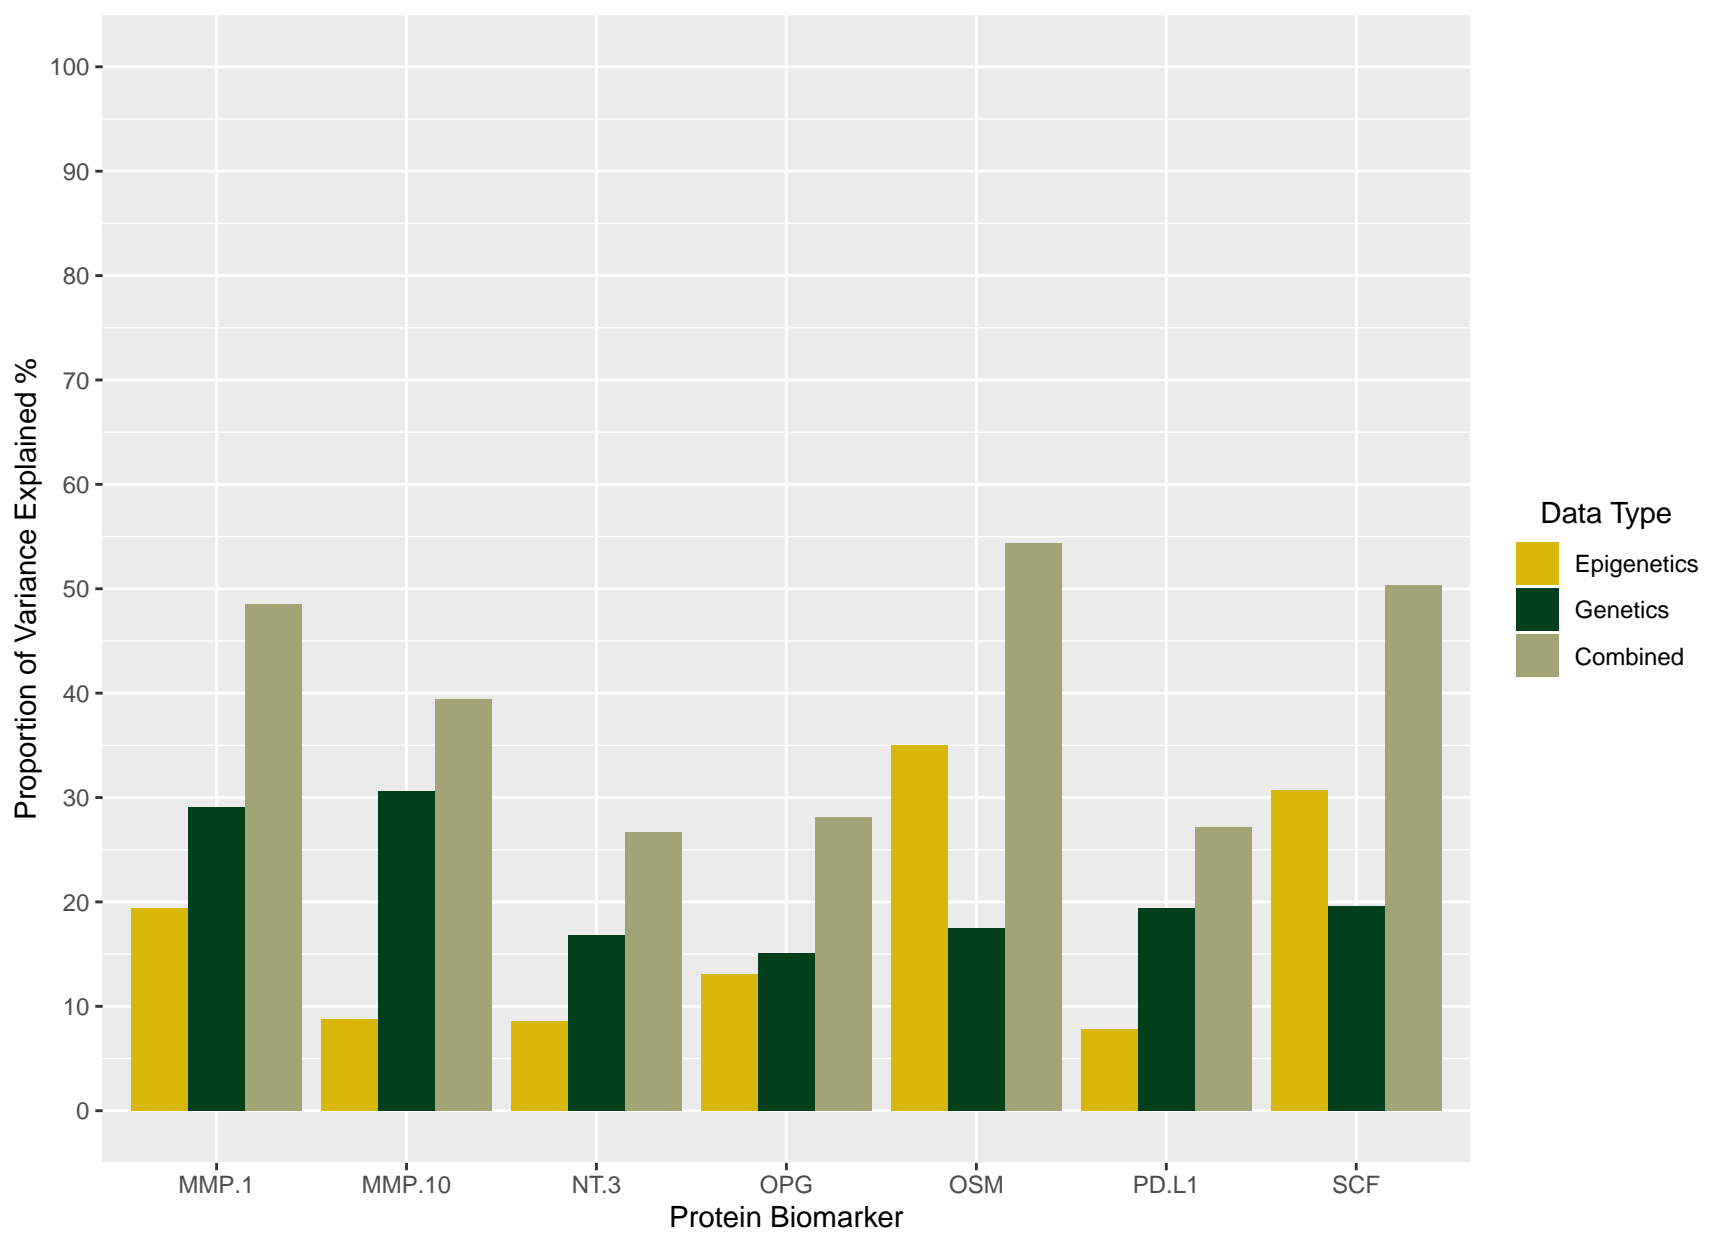



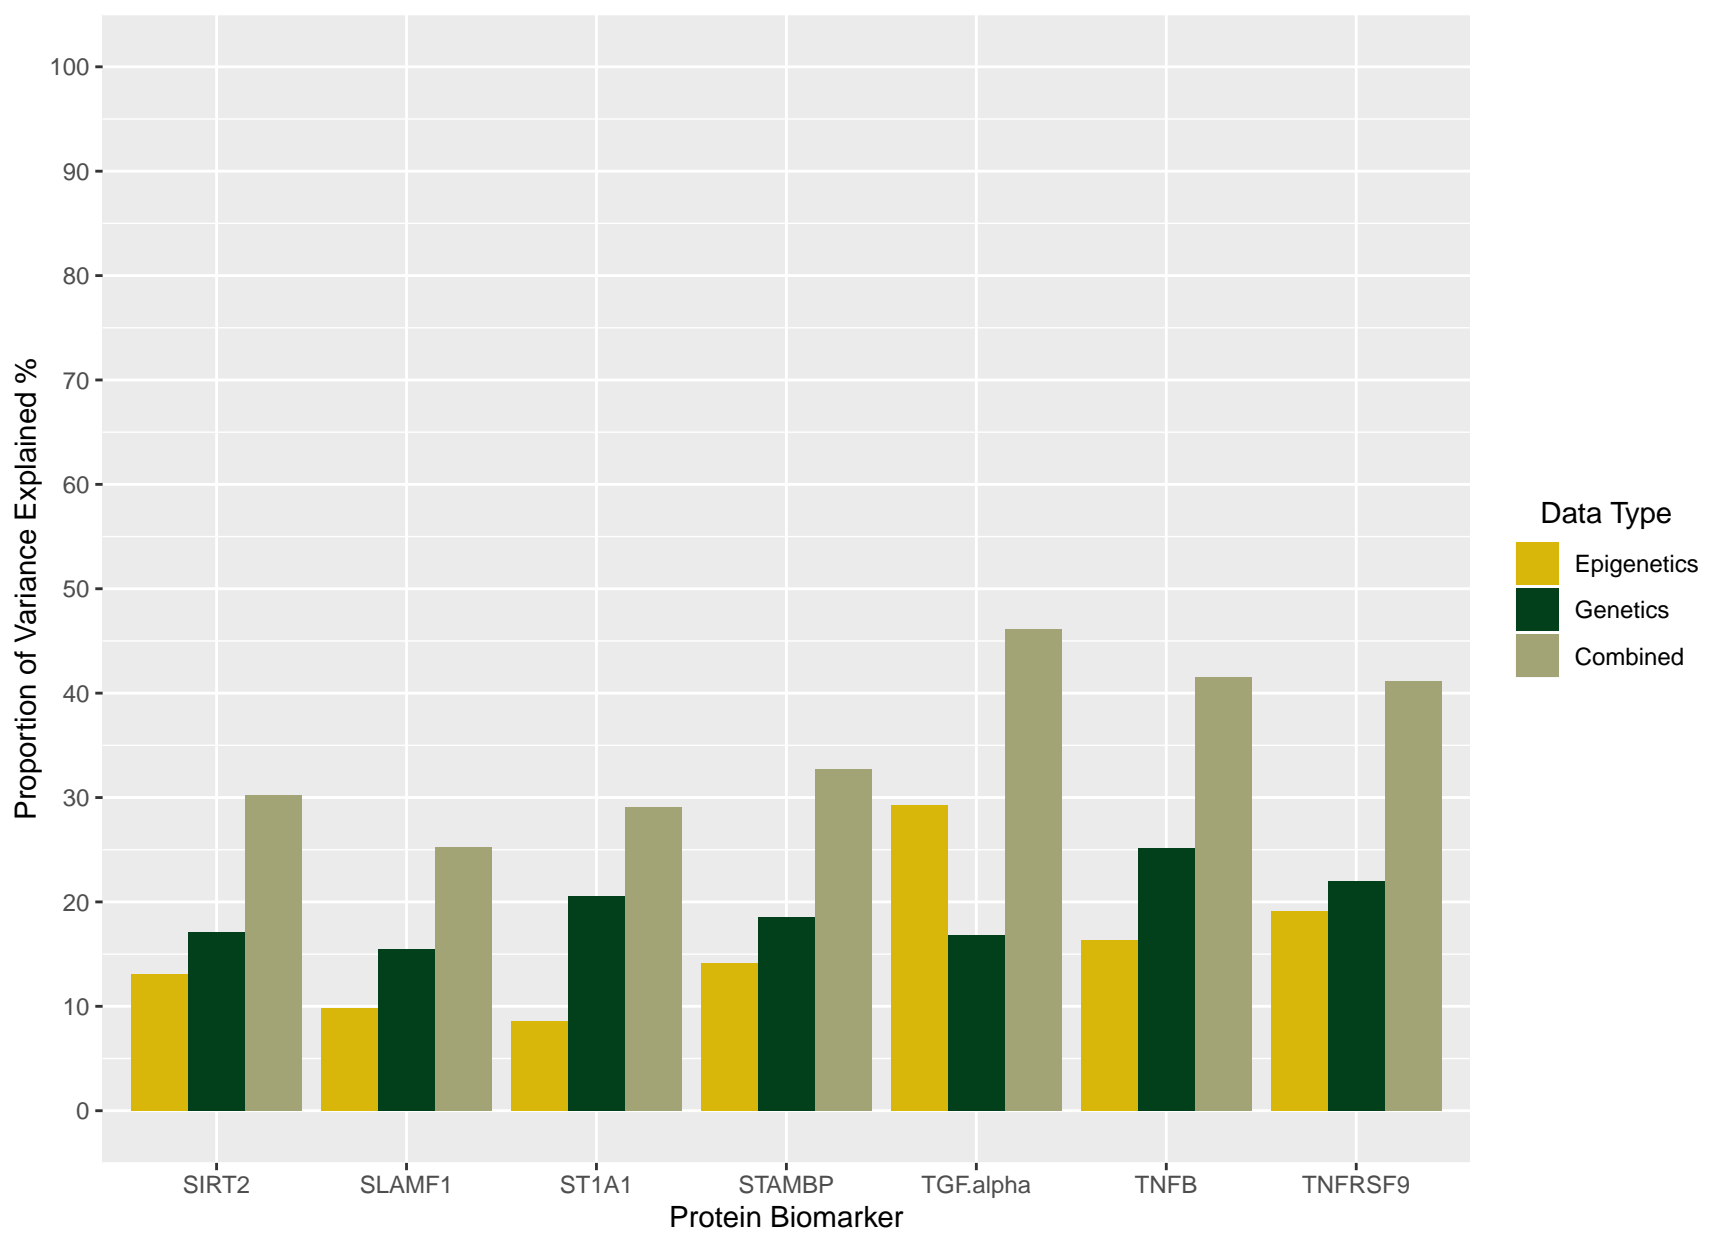

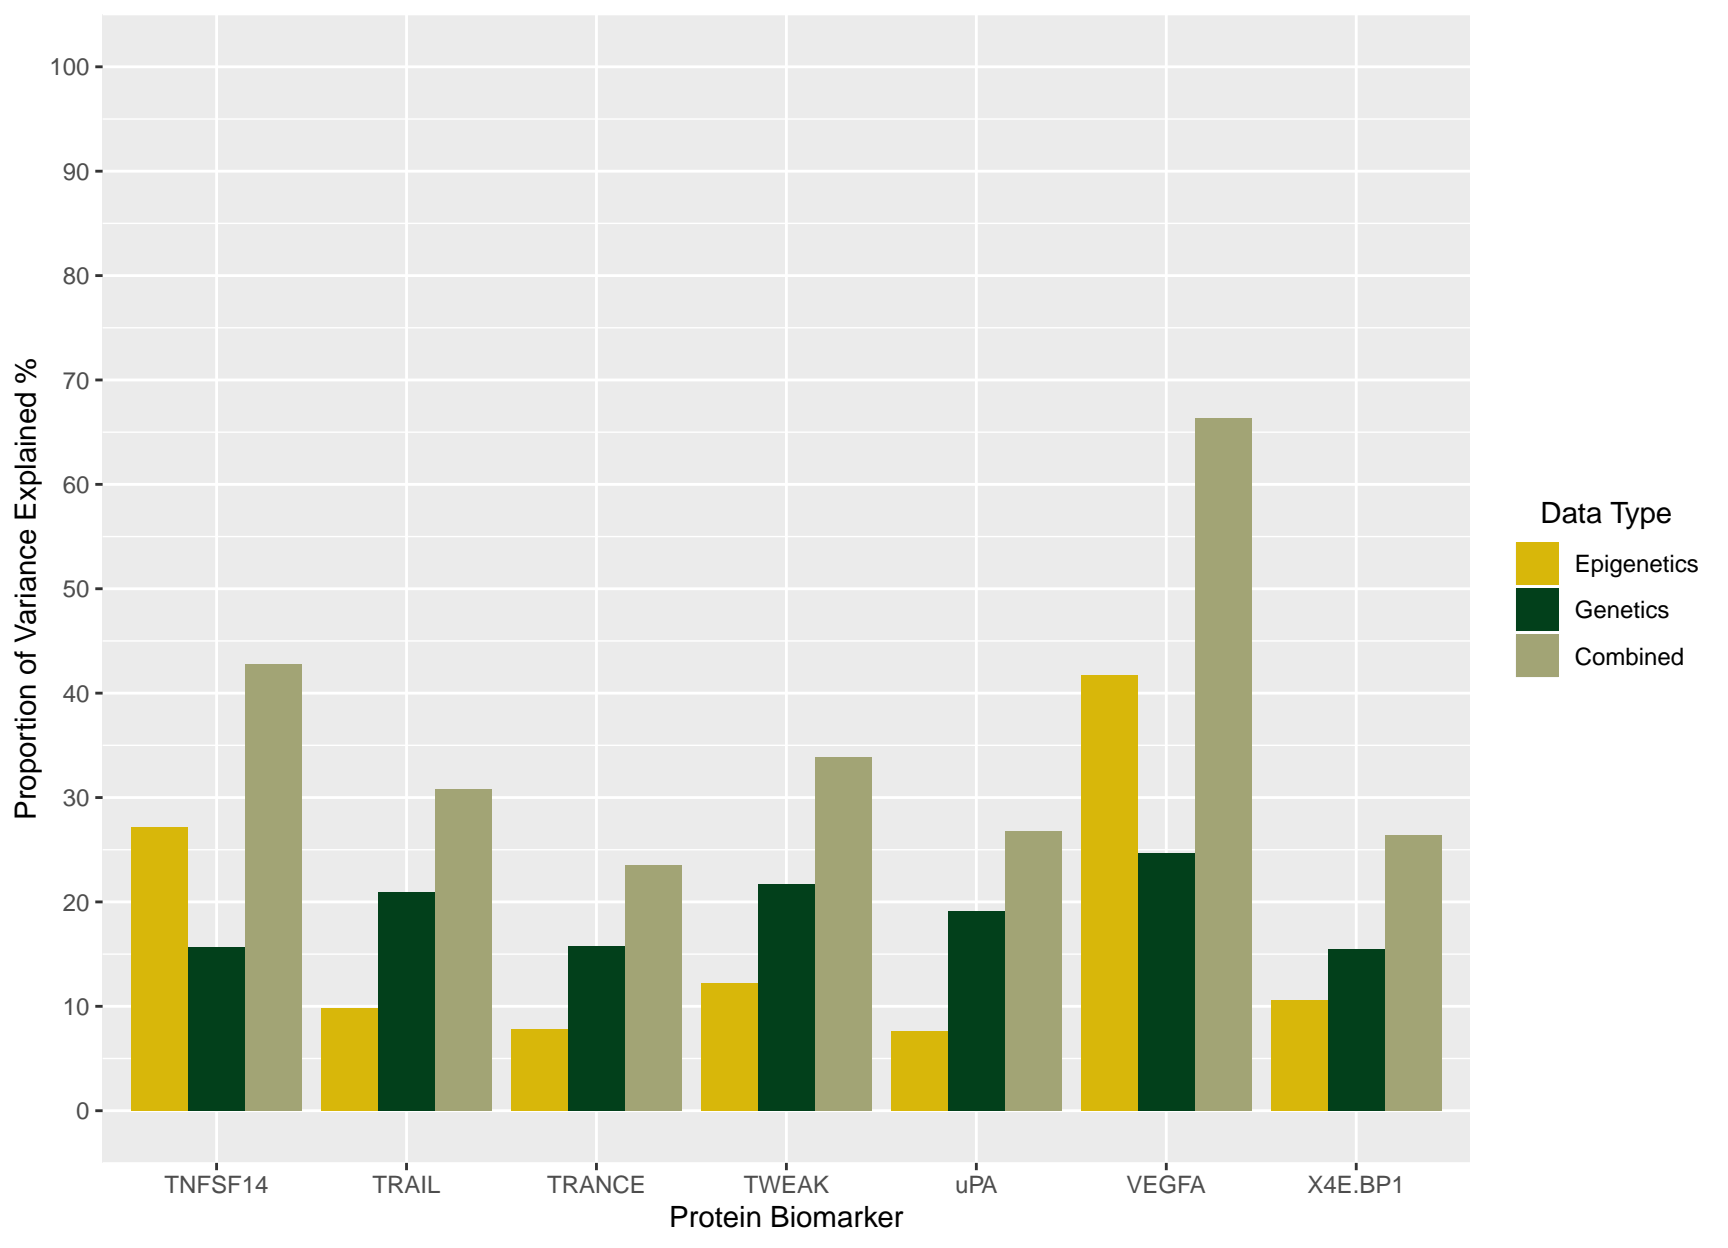

Supplement: 13073_2020_754_MOESM5_ESM.pdf [file 13073_2020_754_MOESM5_ESM.pdf]
